# Supplementary material
Source: Royal Society of Chemistry journal article supplement (doi:10.1039/d6cc02809h)

## Supporting Information

# **Palladium-catalyzed regioselective hydrofunctionalization of methylenecyclopropanes (MCPs) with azaaryl alcohols as latent C(sp<sup>3</sup>)-nucleophiles**

Key Laboratory of Organic Synthesis of Jiangsu Province, College of Chemistry, Chemical Engineering and Materials Science & Collaborative Innovation Center of Suzhou Nano Science and Technology, Soochow University, Suzhou, 215123, P. R. China. E-mail: shunjun@suda.edu.cn; zjcai@suda.edu.cn

## Content

|                                                                                                          |     |
|----------------------------------------------------------------------------------------------------------|-----|
| 1. General information .....                                                                             | S3  |
| 2. Preparation of quinoline derivatives and methylenecyclopropanes (MCPs).....                           | S3  |
| 2.1 Preparation of quinoline derivatives .....                                                           | S3  |
| 2.2 Preparation of methylenecyclopropanes (MCPs) .....                                                   | S4  |
| 3. Optimization of reaction conditions.....                                                              | S4  |
| 4. Experimental procedures .....                                                                         | S7  |
| 4.1 Typical procedure for the synthesis of 3.....                                                        | S7  |
| 4.2 Further transformation of 3 .....                                                                    | S7  |
| 5. References.....                                                                                       | S8  |
| 6. Analytic and characterization data for the products.....                                              | S8  |
| 7. Crystal data and structure refinement for 3.....                                                      | S26 |
| 8. <sup>1</sup> H, <sup>13</sup> C, <sup>19</sup> F NMR spectra of new substrates and all products ..... | S28 |

## 1. General information

Unless otherwise stated, all reagents were purchased from commercial suppliers and used without further purification. An oil bath was used for reactions requiring heating. Temperatures quoted are external. All reactions were carried out at inert atmosphere using reaction tubes and were monitored through thin layer chromatography (TLC) on silica gel-precoated glass plates. Chromatograms were visualized by fluorescence quenching with UV-light at 254 nm and 365 nm. Flash column chromatography was performed using Yantai Yinlong flash silica gel (200-300 mesh). Melting points were recorded on an Electrothermal digital melting point apparatus.  $^1\text{H}$ ,  $^{13}\text{C}$  and  $^{19}\text{F}$  NMR spectra were recorded on Bruker 400 MHz or Agilent 600 MHz spectrometer in  $\text{CDCl}_3$  with tetramethylsilane (TMS) as internal standard. The chemical shifts are expressed in ppm and coupling constants are given in Hz. Data for  $^1\text{H}$  NMR are recorded as follows: chemical shift ( $\delta$ , ppm), multiplicity (s = singlet; d = doublet; t = triplet; q = quarter; p = pentet; m = multiplet; br = broad), coupling constant (Hz), integration. Data for  $^{13}\text{C}$  NMR are reported in terms of chemical shift ( $\delta$ , ppm). Data for  $^{19}\text{F}$  NMR are reported in terms of chemical shift ( $\delta$ , ppm). HRMS spectra were obtained by using BRUKER microTOF-Q III instrument with ESI, EI or CI source. The crystal was measured by using Agilent or Bruker instrument. IR spectra were recorded on a BRUKER VERTEX 70 spectrophotometer and are reported in terms of frequency of absorption ( $\text{cm}^{-1}$ ).

## 2. Preparation of quinoline derivatives and methylenecyclopropanes (MCPs)

### 2.1 Preparation of quinoline derivatives

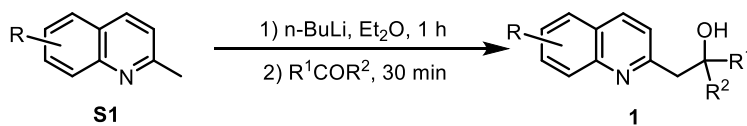

The quinoline derivatives was synthesized according to the literature<sup>[1]</sup>: To a stirred solution of quinoline derivatives (10 mmol, 1 equiv) in anhydrous Et<sub>2</sub>O (50 mL) at 0 °C under nitrogen was added a 1.6 M solution of n-butyllithium in hexanes (6.8 mL, 10.8 mmol, 1.08 equiv). The resulting yellow solution was stirred at 0 °C for 10 min and then at room temperature for 1 h. After cooling to below -30 °C, diisopropyl ketone (1.370 g, 12 mmol, 1.2 equiv) was added and the mixture was stirred for 20 min. The reaction was quenched with saturated aqueous NH<sub>4</sub>Cl solution (20 mL) and warmed to room temperature. The

mixture was extracted with EtOAc (3 × 30 mL). The combined organic layers were dried over Na<sub>2</sub>SO<sub>4</sub> and concentrated under reduced pressure. The residue was purified by silica gel column chromatography to afford the quinoline derivatives.

## 2.2 Preparation of methylenecyclopropanes (MCPs)

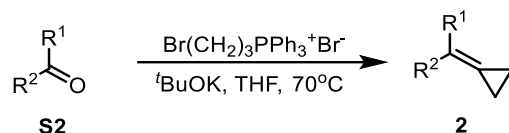

The methylenecyclopropanes was synthesized according to the literature<sup>[2]</sup>: To a suspension of 1-bromopropyl-3-triphenylphosphonium bromide (1.5 equiv) in THF (2 mL/mmol of phosphonium) under argon atmosphere was added a solution of <sup>t</sup>BuOK (3 equiv) in THF (1 mL/mmol of <sup>t</sup>BuOK) via cannula, and the reaction mixture turned to bright orange. The reaction mixture was then heated at reflux with an oil bath for 90 min and the aldehyde or ketone (1 equiv) was then added. The reflux was continued for 16 h for ketones and 2 h for aldehydes, and the reaction mixture was cooled down to room temperature. The reaction mixture was then poured in a large Erlenmeyer containing a large amount of pentane (10 mL/mmol) and the precipitates were filtered. The filtrate was concentrated and the residue was purified on a silica gel chromatography.

## 3. Optimization of reaction conditions

Table S1: Ligand screening<sup>a,b</sup>

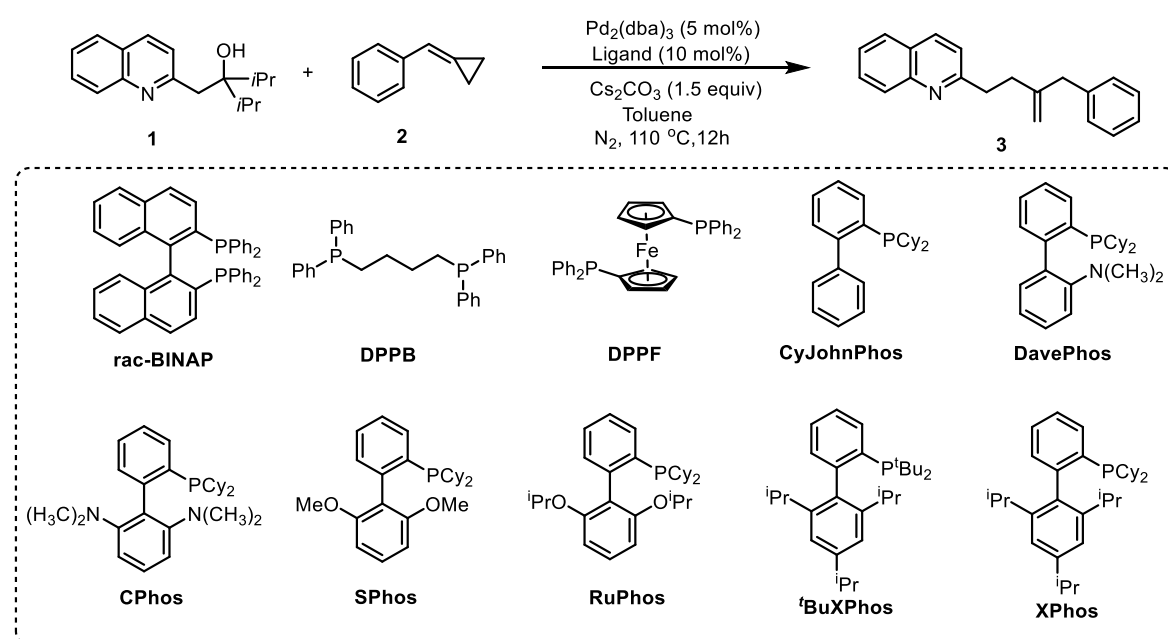

| Entry     | Ligand                           | Yield(%) <sup>b</sup> |
|-----------|----------------------------------|-----------------------|
| 1         | PPh <sub>3</sub>                 | 17                    |
| 2         | <sup>t</sup> BuPh <sub>2</sub> P | 32                    |
| 3         | rac-BINAP                        | trace                 |
| 4         | DPPB                             | 5                     |
| 5         | DPPF                             | 9                     |
| 6         | CyJohnPhos                       | trace                 |
| 7         | DavePhos                         | 42                    |
| 8         | CPhos                            | 27                    |
| 9         | SPhos                            | 46                    |
| 10        | <sup>t</sup> BuXPhos             | trace                 |
| 11        | XPhos                            | 48                    |
| <b>12</b> | <b>RuPhos</b>                    | <b>52</b>             |

<sup>a</sup>Reaction conditions: **1** (0.10 mmol), **2** (0.12 mmol), Pd<sub>2</sub>(dba)<sub>3</sub> (5.0 mol %), Cs<sub>2</sub>CO<sub>3</sub> (1.5 equiv) and ligand (10.0 mol %) in toluene (1.0 mL) at 110 °C for 12 h. <sup>b</sup>Determined by LC analysis using biphenyl as an internal standard.

**Table S2:** Base screening<sup>a,b</sup>

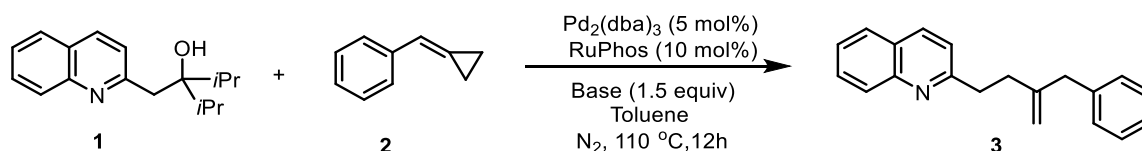

| entry     | Base                            | Yield (%) <sup>b</sup> |
|-----------|---------------------------------|------------------------|
| 13        | Cs <sub>2</sub> CO <sub>3</sub> | 52                     |
| 14        | NaOAc                           | 47                     |
| 15        | NaOH                            | 38                     |
| 16        | <sup>t</sup> BuOK               | N.R.                   |
| <b>17</b> | <b><sup>t</sup>BuOLi</b>        | <b>59</b>              |
| 18        | K <sub>2</sub> CO <sub>3</sub>  | 50                     |
| 19        | KOH                             | 51                     |
| 20        | K <sub>3</sub> PO <sub>4</sub>  | 19                     |
| 21        | DMAP                            | 40                     |

<sup>a</sup>Reaction conditions: **1** (0.10 mmol), **2** (0.12 mmol), Pd<sub>2</sub>(dba)<sub>3</sub> (5.0 mol %), Base (1.5 equiv) and RuPhos (10.0 mol %) in toluene (1.0 mL) at 110 °C for 12 h. <sup>b</sup>Determined by LC analysis using biphenyl as an internal standard.

**Table S3:** Catalyst screening<sup>a,b</sup>

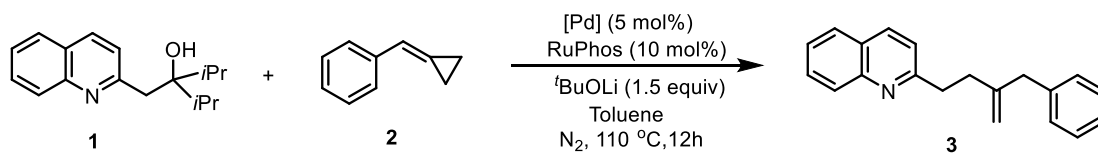

| Entry     | [Pd]                                               | Yield (%) <sup>b</sup> |
|-----------|----------------------------------------------------|------------------------|
| 22        | Pd <sub>2</sub> (dba) <sub>3</sub>                 | 59                     |
| 23        | PdCl <sub>2</sub>                                  | N.R.                   |
| <b>24</b> | <b>Pd(OAc)<sub>2</sub></b>                         | <b>62</b>              |
| 25        | Pd(acac) <sub>2</sub>                              | 41                     |
| 26        | Pd(TFA) <sub>2</sub>                               | 7                      |
| 27        | Pd(alkyl) <sub>2</sub> Cl <sub>2</sub>             | trace                  |
| 28        | Pd(PPh <sub>3</sub> ) <sub>4</sub>                 | 15                     |
| 29        | Pd(PPh <sub>3</sub> ) <sub>2</sub> Cl <sub>2</sub> | trace                  |
| 30        | Pd(MeCN) <sub>4</sub> (OTf) <sub>2</sub>           | 28                     |

<sup>a</sup>Reaction conditions: **1** (0.10 mmol), **2** (0.12 mmol), [Pd] (5.0 mol %), <sup>t</sup>BuOLi (1.5 equiv) and RuPhos (10.0 mol %) in Toluene (1.0 mL) at 110 °C for 12 h. <sup>b</sup>Determined by LC analysis using biphenyl as an internal standard.

**Table S4:** Solvent screening<sup>a,b,c</sup>

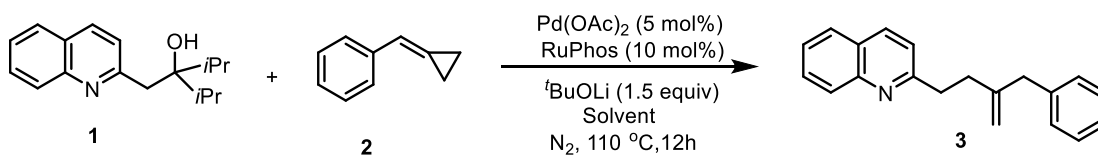

| Entry     | Solvent       | Yield (%) <sup>b</sup>    |
|-----------|---------------|---------------------------|
| 31        | Toluene       | 62                        |
| <b>32</b> | <b>Xylene</b> | <b>72(70)<sup>c</sup></b> |
| 33        | MeCN          | trace                     |
| 34        | DMA           | N.R.                      |
| 35        | Dioxane       | 64                        |

|    |      |       |
|----|------|-------|
| 36 | NMP  | N.R.  |
| 37 | DCM  | 42    |
| 38 | EA   | trace |
| 39 | EtOH | N.R.  |
| 40 | THF  | 36    |

<sup>a</sup>Reaction conditions: **1** (0.10 mmol), **2** (0.12 mmol), Pd(OAc)<sub>2</sub> (5.0 mol %), <sup>t</sup>BuOLi (1.5 equiv) and RuPhos (10.0 mol %) in Solvent (1.0 mL) at 110 °C for 12 h. <sup>b</sup>Determined by LC analysis using biphenyl as an internal standard. <sup>c</sup>Isolated yield.

## 4. Experimental procedures

### 4.1 Typical procedure for the synthesis of **3**

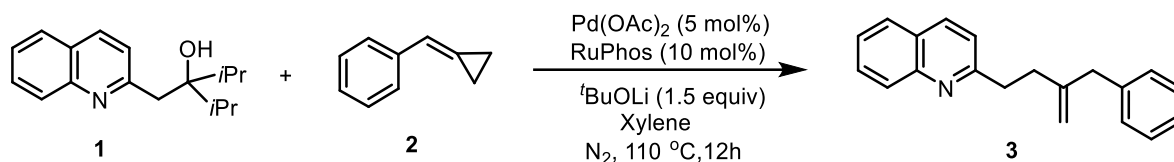

In a glovebox, an 8 mL glass reaction vial was sequentially charged with 2-quinolinyl tertiary alcohol **1** (0.2 mmol, 1.0 equiv), methylenecyclopropane substrate **2** (0.24 mmol, 1.2 equiv), Pd(OAc)<sub>2</sub> (0.01 mmol, 5 mol%), RuPhos (0.02 mmol, 10 mol%), <sup>t</sup>BuOLi (0.3 mmol, 1.5 equiv), and xylene (2 mL). The reaction mixture was stirred at 110 °C for 12 h. After cooling, the mixture was filtered through Celite, and the solution was concentrated under reduced pressure by rotary evaporation. The residue was purified by column chromatography (PE/EtOAc = 40:1-30:1) to afford product **3**.

### 4.2 Further transformation of **3**

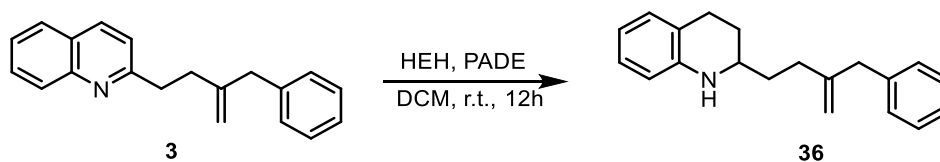

To an 8 mL vial equipped with a magnetic stir bar were added **3** (0.2 mmol, 1.0 equiv), PADE (0.02 mmol, 10 mol%), and HEH (0.48 mmol, 2.4 equiv). Dichloromethane (4 mL) was added under an air atmosphere, and the mixture was stirred at 30 °C for 12 h. After completion of the reaction, the solvent was removed under reduced pressure. The residue was purified by column chromatography on silica gel (PE/EtOAc = 60:1 to 40:1) to afford a yellow liquid **36** (50 mg, 90%).

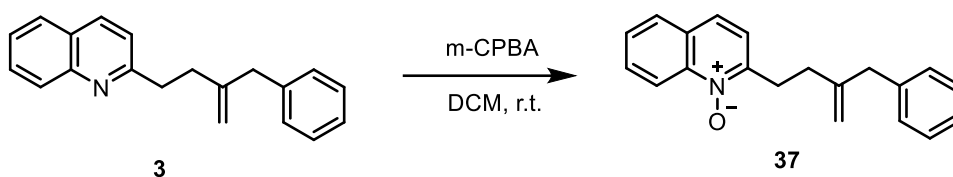

**3** (0.2 mmol, 1.0 equiv) was dissolved in DCM. *m*-CPBA (0.3 mmol, 1.5 equiv) was added slowly at room temperature, and the mixture was stirred for 6 h. The reaction was quenched with saturated aqueous sodium thiosulfate, extracted with DCM three times, dried over anhydrous sodium sulfate, filtered, and concentrated. The residue was purified by silica gel column chromatography (DCM/MeOH = 40:1-20:1) to give compound **37** as a colorless oil (28 mg, 48%).

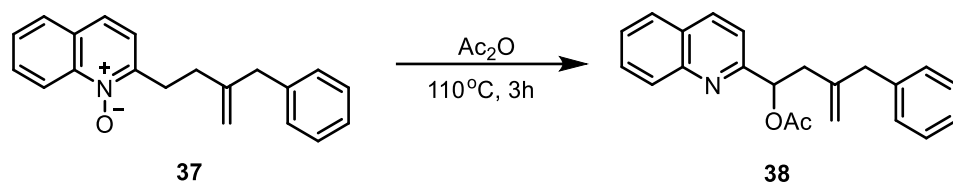

To a 25 mL Schlenk tube equipped with a magnetic stir bar was sealed, and the system was purged with nitrogen gas three times. Quinoline N-oxide derivative **37** (0.2 mmol, 1.0 equiv.) and acetic anhydride (4 mL) were added. The mixture was heated and stirred at 110 °C for 3 h. After completion of the reaction, the solvent was removed under reduced pressure. The crude product was purified by a column chromatography on a silica gel (PE/EtOAc = 40:1-20:1) to afford the product **38** as a yellow liquid (28 mg, 42%).

## 5. References

- [1] M. M. López, N. Jamey, A. Pinet, B. Figadère and L. Ferrié, *Org. Lett.*, 2021, **23**, 1626-1631.
- [2] D.-W. Wang, X.-B. Wang, D.-S. Wang, S.-M. Lu, Y.-G. Zhou and Y.-X. Li, *J. Org. Chem.*, 2009, **74**, 2780-2787.

## 6. Analytic and characterization data for the products

**(8R,9S,13S,14S)-3-(benzyloxy)-13-methyl-6,7,8,9,11,12,13,14,15,16-decahydro-17H-cyclopenta[a]phenanthren-17-one (31-1)**

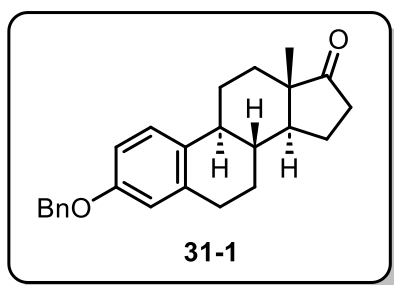

To a dried reaction tube were added estrone (5.0 mmol) and anhydrous potassium carbonate (10.0 mmol). The tube was evacuated and backfilled with nitrogen three times. Acetone (15 mL) was added, and the mixture was stirred at room temperature for 10 min. The reaction mixture was heated to reflux at 56 °C and stirred for 48 h.

After cooling to room temperature, the mixture was filtered to remove inorganic salts, and the filtrate was concentrated under reduced pressure to give a crude product. The crude product was purified by column chromatography to afford a white solid (1.45 g, 80% yield). **m.p.** = 123.8-124.5 °C. **<sup>1</sup>H NMR (400 MHz, CDCl<sub>3</sub>)** δ 7.45 - 7.41 (m, 2H), 7.40 - 7.35 (m, 2H), 7.34 - 7.29 (m, 1H), 7.20 (dd, *J* = 8.7, 1.1 Hz, 1H), 6.79 (dd, *J* = 8.6, 2.8 Hz, 1H), 6.73 (d, *J* = 2.7 Hz, 1H), 5.03 (s, 2H), 2.93 - 2.86 (m, 2H), 2.50 (dd, *J* = 18.8, 8.6 Hz, 1H), 2.42 - 2.36 (m, 1H), 2.30 - 2.22 (m, 1H), 2.19 - 2.09 (m, 1H), 2.08 - 1.93 (m, 3H), 1.68 - 1.60 (m, 1H), 1.58 - 1.41 (m, 5H), 0.91 (s, 3H). **<sup>13</sup>C NMR (101 MHz, CDCl<sub>3</sub>)** δ 156.9, 137.8, 137.3, 132.3, 128.6, 127.9, 127.5, 126.4, 114.9, 112.4, 70.0, 50.4, 48.0, 44.0, 38.4, 35.9, 31.6, 29.7, 26.6, 25.9, 21.6, 13.9. **HRMS (ESI)** calcd for [M+Na]<sup>+</sup> C<sub>25</sub>H<sub>28</sub>NaO<sub>2</sub><sup>+</sup>, *m/z*: 383.1987, found: 383.1985. **FT-IR (ATR)**: 2919, 2866, 2051, 2029, 1734, 1601, 1495, 1228, 1022, 818, 751, 728, 694 cm<sup>-1</sup>.

**(8S,9S,13S,14S)-3-(benzyloxy)-17-cyclopropylidene-13-methyl-7,8,9,11,12,13,14,15,16,17-decahydro-6H-cyclopenta[a]phenanthrene (31-2)**

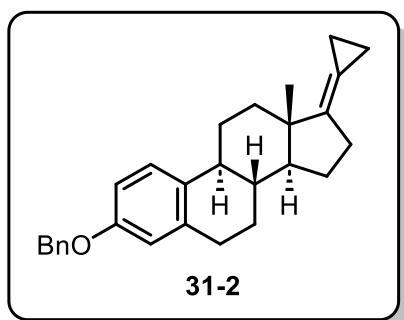

According to the general procedure, **31-2** was obtained as a white solid (0.82 g, 53% yield). **m.p.** = 87.9-89.9 °C. **<sup>1</sup>H NMR (400 MHz, CDCl<sub>3</sub>)** δ 7.42 (d, *J* = 8.4 Hz, 2H), 7.37 (t, *J* = 7.4 Hz, 2H), 7.30 (t, *J* = 7.2 Hz, 1H), 7.22 (d, *J* = 8.5 Hz, 1H), 6.78 (dd, *J* = 8.5, 2.8 Hz, 1H), 6.72 (d, *J* = 2.8 Hz, 1H), 5.03 (s, 2H), 2.95 - 2.80 (m, 2H), 2.60 - 2.49 (m, 1H), 2.41 - 2.30 (m, 2H), 2.28 - 2.18 (m, 1H), 2.18 - 2.10 (m, 1H), 1.99 - 1.91 (m, 1H), 1.91 - 1.82 (m, 1H), 1.54 (d, *J* = 8.9 Hz, 2H), 1.49 - 1.41 (m, 2H), 1.40 - 1.28 (m, 2H), 1.14 - 1.01 (m, 2H), 0.85 (s, 4H), 0.84 - 0.79 (m, 1H). **<sup>13</sup>C NMR (101 MHz, CDCl<sub>3</sub>)** δ 157.3, 139.7, 138.7, 138.0, 133.9, 129.1, 128.4, 128.0, 126.9, 115.4, 112.8, 107.8, 70.6, 54.9, 45.6, 44.9, 39.5, 36.9, 30.5, 29.6, 28.3, 27.3, 25.0, 18.4, 2.1,

0.0. **HRMS (ESI)** calcd for  $[M+H]^+$   $C_{28}H_{33}O^+$ ,  $m/z$ : 385.2531, found: 385.2532. **FT-IR** (ATR): 2913, 2848, 2180, 2145, 1962, 1495, 1278, 1027, 730, 693  $cm^{-1}$ .

### (R)-1-cyclopropylidene-3-methylcyclopentadecane (32-1)

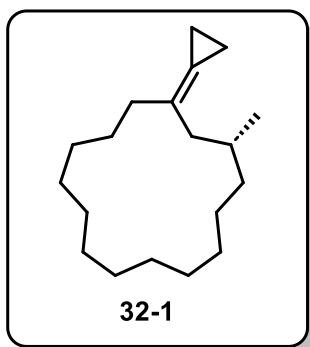

According to the general procedure, **32-1** was obtained as a yellow oil (0.84 g, 64% yield).  **$^1H$  NMR (400 MHz,  $CDCl_3$ )**  $\delta$  2.22 - 2.09 (m, 3H), 1.93 (dd,  $J = 13.4, 7.7$  Hz, 1H), 1.77 - 1.68 (m, 1H), 1.60 - 1.51 (m, 1H), 1.47 - 1.20 (m, 20H), 1.14 - 1.06 (m, 1H), 1.05 - 1.00 (m, 2H), 0.98 - 0.92 (m, 2H), 0.82 (d,  $J = 6.6$  Hz, 3H).  **$^{13}C$  NMR (101 MHz,  $CDCl_3$ )**  $\delta$  125.7, 114.1, 40.8, 33.5, 32.1, 28.1, 25.8, 25.1, 24.8, 24.8, 24.7, 24.6, 24.5, 23.3, 18.5, 0.5,

0.0. **HRMS (ESI)** calcd for  $[M+H]^+$   $C_{19}H_{35}^+$ ,  $m/z$ : 263.2739, found: 263.2739. **FT-IR** (ATR): 2922, 2853, 1456, 1373, 1350, 992, 716  $cm^{-1}$ .

### 2-(3-benzylbut-3-en-1-yl)quinoline (3)

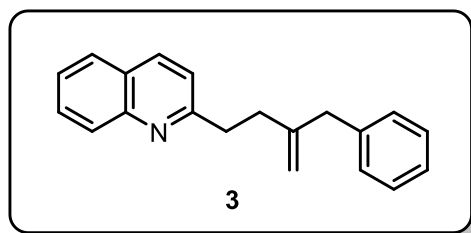

According to the general procedure, **3** was obtained as a yellow liquid (38 mg, 70% yield).  **$^1H$  NMR (400 MHz,  $CDCl_3$ )**  $\delta$  8.05 (dd,  $J = 16.0, 8.4$  Hz, 2H), 7.75 (dd,  $J = 8.0, 1.5$  Hz, 1H), 7.70 - 7.65 (m, 1H), 7.49 - 7.45 (m, 1H), 7.30 - 7.24 (m, 2H), 7.20 (t,  $J =$

7.7 Hz, 4H), 4.92 (d,  $J = 1.6$  Hz, 1H), 4.79 (d,  $J = 1.4$  Hz, 1H), 3.41 (s, 2H), 3.18 - 3.11 (m, 2H), 2.51 (t,  $J = 8.0$  Hz, 2H).  **$^{13}C$  NMR (101 MHz,  $CDCl_3$ )**  $\delta$  162.1, 148.0, 147.6, 139.6,

136.5, 129.6, 129.1, 128.7, 128.3, 127.5, 126.8, 126.1, 125.9, 121.3, 111.9, 43.3, 37.2, 35.2.

**HRMS (ESI)** calcd for  $[M+H]^+$   $C_{20}H_{20}N^+$ ,  $m/z$ : 274.1596, found: 274.1594. **FT-IR** (ATR): 2923, 1599, 1500, 1445, 1113, 823, 745  $cm^{-1}$ .

### 2-(3-(4-methoxybenzyl)but-3-en-1-yl)quinoline (4)

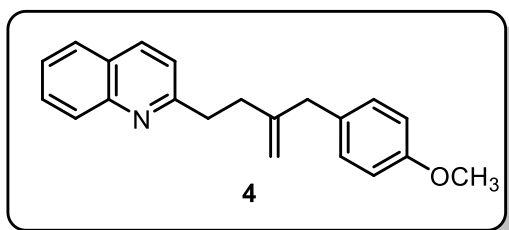

According to the general procedure, **4** was obtained as a yellow liquid (38 mg, 62% yield).

**$^1H$  NMR (400 MHz,  $CDCl_3$ )**  $\delta$  8.04 (dd,  $J = 8.6, 3.2$  Hz, 2H), 7.75 (dd,  $J = 8.2, 1.5$  Hz, 1H), 7.70 - 7.64 (m, 1H), 7.49 - 7.45 (m, 1H), 7.26 (d,  $J = 8.4$

Hz, 1H), 7.12 (s, 4H), 4.90 (d,  $J = 1.4$  Hz, 1H), 4.53 (d,  $J = 1.9$  Hz, 1H), 3.40 (s, 2H), 3.19 -

3.14 (m, 2H), 2.61 - 2.54 (m, 2H), 2.24 (s, 3H).  $^{13}\text{C}$  NMR (101 MHz,  $\text{CDCl}_3$ )  $\delta$  162.2, 148.0, 147.1, 137.7, 136.9, 136.3, 130.2, 130.1, 129.4, 128.9, 127.5, 126.8, 126.4, 125.9, 125.8, 121.3, 111.3, 40.6, 38.0, 36.1, 19.4. HRMS (ESI) calcd for  $[\text{M}+\text{H}]^+$   $\text{C}_{21}\text{H}_{22}\text{NO}^+$ ,  $m/z$ : 304.1696, found: 304.1694. FT-IR (ATR): 2982, 1731, 1597, 1284, 1156, 1031, 907, 725, 645  $\text{cm}^{-1}$ .

### 2-(3-(4-methylbenzyl)but-3-en-1-yl)quinoline (5)

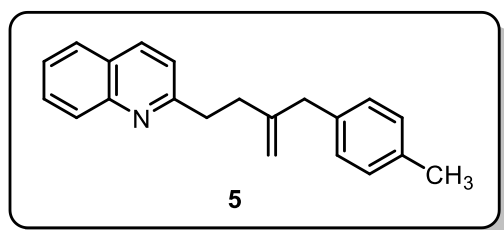

According to the general procedure, **5** was obtained as a yellow liquid (28 mg, 48% yield).

$^1\text{H}$  NMR (400 MHz,  $\text{CDCl}_3$ )  $\delta$  8.04 (dd,  $J = 8.3$ , 2.5 Hz, 2H), 7.77 (dd,  $J = 8.0$ , 1.5 Hz, 1H), 7.70 - 7.65 (m, 1H), 7.50 - 7.46 (m, 1H), 7.24 (d,  $J = 8.4$

Hz, 1H), 7.09 (s, 4H), 4.90 (s, 1H), 4.79 (s, 1H), 3.38 (s, 2H), 3.18 - 3.09 (m, 2H), 2.50 (t,  $J = 8.0$  Hz, 2H), 2.31 (s, 3H).  $^{13}\text{C}$  NMR (101 MHz,  $\text{CDCl}_3$ )  $\delta$  162.6, 148.3, 147.3, 136.5, 136.2, 135.6, 129.4, 129.0, 128.9, 128.8, 127.5, 126.8, 125.8, 121.3, 111.6, 42.9, 37.4, 35.5, 21.1. HRMS (ESI) calcd for  $[\text{M}+\text{H}]^+$   $\text{C}_{21}\text{H}_{22}\text{N}^+$ ,  $m/z$ : 288.1747, found: 288.1749. FT-IR (ATR): 2916, 1599, 1495, 1447, 1315, 1118, 888, 829, 737, 699  $\text{cm}^{-1}$ .

### 2-(3-([1,1'-biphenyl]-4-ylmethyl)but-3-en-1-yl)quinoline (6)

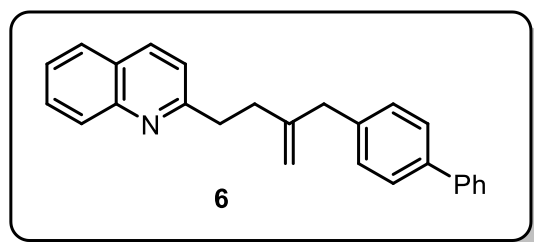

According to the general procedure, **6** was obtained as a yellow liquid (45 mg, 65% yield).

$^1\text{H}$  NMR (400 MHz,  $\text{CDCl}_3$ )  $\delta$  8.02 (dd,  $J = 14.4$ , 8.5 Hz, 2H), 7.73 (dd,  $J = 8.2$ , 1.5 Hz, 1H), 7.67 - 7.63 (m, 1H), 7.59 - 7.55 (m, 2H), 7.52 - 7.48 (m, 2H), 7.47 - 7.38 (m, 3H), 7.33 - 7.28

(m, 1H), 7.28 - 7.24 (m, 2H), 7.21 (d,  $J = 8.4$  Hz, 1H), 4.95 (s, 1H), 4.84 (s, 1H), 3.45 (s, 2H), 3.18 - 3.12 (m, 2H), 2.53 (t,  $J = 8.1$  Hz, 2H).  $^{13}\text{C}$  NMR (101 MHz,  $\text{CDCl}_3$ )  $\delta$  162.2, 148.0, 148.0, 141.1, 139.1, 138.8, 136.3, 129.5, 129.4, 128.9, 128.8, 127.6, 127.1, 127.1, 126.8, 125.8, 121.34, 112.0, 43.0, 37.4, 35.2. HRMS (ESI) calcd for  $[\text{M}+\text{H}]^+$   $\text{C}_{26}\text{H}_{24}\text{N}^+$ ,  $m/z$ : 350.1903, found: 350.1903. FT-IR (ATR): 2924, 1604, 1437, 1373, 1117, 891, 825, 759  $\text{cm}^{-1}$ .

### 2-(3-(4-fluorobenzyl)but-3-en-1-yl)quinoline (7)

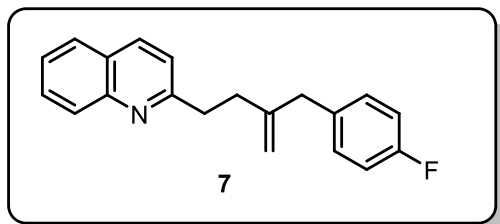

According to the general procedure, **7** was obtained as a yellow liquid (41 mg, 57% yield).

**<sup>1</sup>H NMR (400 MHz, CDCl<sub>3</sub>)** δ 8.03 (t, *J* = 7.7 Hz, 2H), 7.77 (dd, *J* = 8.2, 1.5 Hz, 1H), 7.70 - 7.64 (m, 1H), 7.52 - 7.46 (m, 1H), 7.23 (d, *J* = 8.5 Hz, 1H),

7.18 - 7.11 (m, 2H), 7.01 - 6.91 (m, 2H), 4.92 (d, *J* = 1.7 Hz, 1H), 4.77 (d, *J* = 1.8 Hz, 1H), 3.38 (s, 2H), 3.16 - 3.10 (m, 2H), 2.49 (t, *J* = 8.1 Hz, 2H). **<sup>13</sup>C NMR (101 MHz, CDCl<sub>3</sub>)** δ 162.4 (d, *J*<sub>C-F</sub> = 67.5 Hz), 160.3, 148.0 (d, *J*<sub>C-F</sub> = 7.1 Hz), 136.3, 135.2, 135.1, 130.4 (d, *J*<sub>C-F</sub> = 10.1 Hz), 129.5, 128.8, 127.5, 126.8, 125.8, 121.3, 115.1 (d, *J*<sub>C-F</sub> = 8.0 Hz), 111.9, 42.5, 37.3, 35.1. **<sup>19</sup>F NMR (376 MHz, CDCl<sub>3</sub>)** δ -117.4. **HRMS (ESI)** calcd for [M+H]<sup>+</sup> C<sub>20</sub>H<sub>19</sub>FN<sup>+</sup>, *m/z*: 292.1496, found: 292.1491. **FT-IR (ATR)**: 2918, 1602, 1503, 1430, 1219, 820, 757 cm<sup>-1</sup>.

### 2-(3-(3-fluorobenzyl)but-3-en-1-yl)quinoline (8)

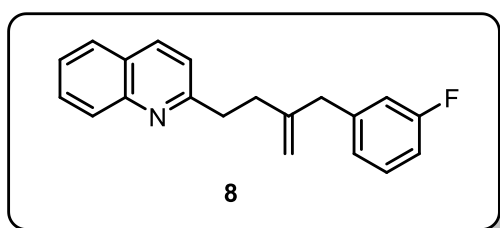

According to the general procedure, **8** was obtained as a yellow liquid (43 mg, 74% yield).

**<sup>1</sup>H NMR (400 MHz, CDCl<sub>3</sub>)** δ 8.08 (d, *J* = 8.4 Hz, 2H), 7.78 (dd, *J* = 8.2, 1.5 Hz, 1H), 7.73 - 7.67 (m, 1H), 7.53 - 7.46 (m, 1H), 7.26 - 7.19 (m, 2H),

6.97 (d, *J* = 7.6 Hz, 1H), 6.93 - 6.85 (m, 2H), 4.95 (d, *J* = 1.6 Hz, 1H), 4.81 (d, *J* = 1.7 Hz, 1H), 3.41 (s, 2H), 3.19 - 3.12 (m, 2H), 2.51 (t, *J* = 8.0 Hz, 2H). **<sup>13</sup>C NMR (101 MHz, CDCl<sub>3</sub>)** δ 165.4, 161.8 (d, *J*<sub>C-F</sub> = 24.6 Hz), 147.9, 146.8, 142.2 (d, *J*<sub>C-F</sub> = 7.3 Hz), 136.3, 129.7 (d, *J*<sub>C-F</sub> = 8.3 Hz), 129.4, 128.9, 127.5, 126.8, 125.8, 124.8 (d, *J*<sub>C-F</sub> = 2.8 Hz), 121.3, 115.8 (d, *J*<sub>C-F</sub> = 21.2 Hz), 113.1 (d, *J*<sub>C-F</sub> = 21.2 Hz), 112.3, 43.0 (d, *J*<sub>C-F</sub> = 1.8 Hz), 37.3, 35.1. **<sup>19</sup>F NMR (376 MHz, CDCl<sub>3</sub>)** δ -113.8. **HRMS (ESI)** calcd for [M+H]<sup>+</sup> C<sub>20</sub>H<sub>19</sub>FN<sup>+</sup>, *m/z*: 292.1496, found: 292.1492. **FT-IR (ATR)**: 2919, 1604, 1498, 1437, 1265, 821, 737 cm<sup>-1</sup>.

### 2-(3-(3-methylbenzyl)but-3-en-1-yl)quinoline (9)

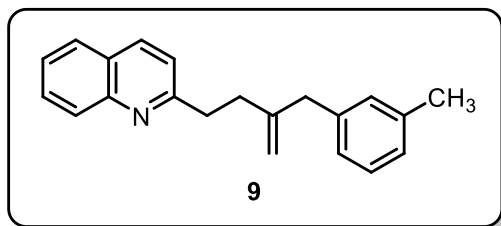

According to the general procedure, **9** was obtained as a yellow liquid (24 mg, 42% yield).

**<sup>1</sup>H NMR (400 MHz, CDCl<sub>3</sub>)** δ 8.05 - 8.00 (m, 2H), 7.74 (dd, *J* = 8.1, 1.5 Hz, 1H), 7.69 - 7.64 (m, 1H), 7.49 - 7.44 (m, 1H), 7.21 (d, *J* = 8.5 Hz,

1H), 7.18 - 7.14 (m, 1H), 7.00 (d, *J* = 5.8 Hz, 3H), 4.91 (dd, *J* = 3.2, 1.6 Hz, 1H), 4.80 (dd, *J* = 2.6, 1.3 Hz, 1H), 3.38 (s, 2H), 3.17 - 3.09 (m, 2H), 2.50 (t, *J* = 6.0 Hz, 2H), 2.31 (s, 3H). **<sup>13</sup>C NMR (101 MHz, CDCl<sub>3</sub>)** δ 162.9, 148.1, 147.9, 134.0, 137.9, 136.2, 129.8, 129.40, 128.8, 128.2, 127.5, 126.9, 126.8, 126.1, 125.8, 121.0, 111.7, 43.3, 37.4, 35.2, 21.4. **HRMS (ESI)** calcd for [M+H]<sup>+</sup> C<sub>21</sub>H<sub>22</sub>N<sup>+</sup>, *m/z*: 288.1747, found: 288.1742. **FT-IR (ATR)**: 2915, 1602, 1499, 1431, 1310, 890, 821, 749 cm<sup>-1</sup>.

### 2-(3-(2-methylbenzyl)but-3-en-1-yl)quinoline (10)

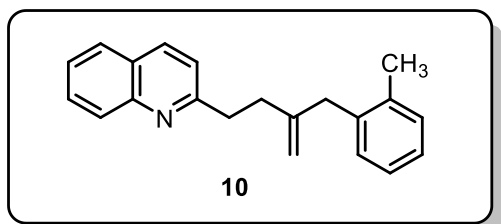

According to the general procedure, **10** was obtained as a yellow liquid (33 mg, 57% yield). **<sup>1</sup>H NMR (400 MHz, CDCl<sub>3</sub>)** δ 8.04 (dd, *J* = 8.5, 2.8 Hz, 2H), 7.75 (dd, *J* = 8.1, 1.6 Hz, 1H), 7.69 - 7.65 (m, 1H), 7.49 - 7.44 (m, 1H), 7.26 (d, *J* = 8.5 Hz,

1H), 7.12 (s, 4H), 4.90 (dd, *J* = 2.6, 1.3 Hz, 1H), 4.53 (d, *J* = 1.9 Hz, 1H), 3.40 (d, *J* = 1.3 Hz, 2H), 3.20 - 3.14 (m, 2H), 2.61 - 2.55 (m, 2H), 2.24 (s, 3H). **<sup>13</sup>C NMR (101 MHz, CDCl<sub>3</sub>)** δ 162.2, 148.0, 147.1, 137.7, 136.9, 136.3, 130.2, 130.1, 129.4, 128.9, 127.5, 126.8, 126.4, 125.9, 125.8, 121.3, 111.3, 40.6, 38.1, 36.1, 19.4. **HRMS (ESI)** calcd for [M+H]<sup>+</sup> C<sub>21</sub>H<sub>22</sub>N<sup>+</sup>, *m/z*: 288.1747, found: 288.1746. **FT-IR (ATR)**: 2923, 1600, 1446, 1330, 1165, 1124, 824, 754, 704 cm<sup>-1</sup>.

### 2-(3-(2-fluorobenzyl)but-3-en-1-yl)quinoline (11)

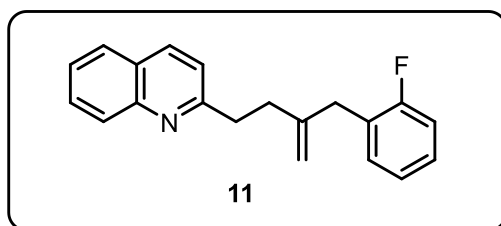

According to the general procedure, **11** was obtained as a yellow liquid (49 mg, 84% yield).

**<sup>1</sup>H NMR (400 MHz, CDCl<sub>3</sub>)** δ 7.99 (dd, *J* = 8.5, 2.0 Hz, 2H), 7.70 (dd, *J* = 8.2, 1.4 Hz, 1H), 7.66 - 7.57 (m, 1H), 7.41 (t, *J* = 7.5 Hz, 1H), 7.19 (d,

$J = 2.1$  Hz, 1H), 7.17 - 7.06 (m, 2H), 7.02 - 6.89 (m, 2H), 4.84 (s, 1H), 4.66 (s, 1H), 3.38 (s, 2H), 3.14 - 3.06 (m, 2H), 2.48 (t,  $J = 8.1$  Hz, 2H).  **$^{13}\text{C}$  NMR (101 MHz,  $\text{CDCl}_3$ )**  $\delta$  162.4 (d,  $J_{\text{C-F}} = 34.6$  Hz), 160.0, 148.3, 146.8, 136.3, 131.3 (d,  $J_{\text{C-F}} = 4.7$  Hz), 129.4, 128.8, 128.0 (d,  $J_{\text{C-F}} = 8.1$  Hz), 127.5, 126.8, 126.5 (d,  $J_{\text{C-F}} = 14.8$  Hz), 125.8, 124.0 (d,  $J_{\text{C-F}} = 3.6$  Hz), 121.4, 115.3 (d,  $J_{\text{C-F}} = 22.5$  Hz), 111.8, 37.4, 35.7 (d,  $J_{\text{C-F}} = 2.9$  Hz), 35.6.  **$^{19}\text{F}$  NMR (376 MHz,  $\text{CDCl}_3$ )**  $\delta$  -118.2. **HRMS (ESI)** calcd for  $[\text{M}+\text{H}]^+$   $\text{C}_{20}\text{H}_{19}\text{FN}^+$ ,  $m/z$ : 292.1496, found: 292.1491. **FT-IR (ATR)**: 2920, 1599, 1493, 1438, 1226, 895, 823, 751  $\text{cm}^{-1}$ .

### 2-(3-(3,5-dimethylbenzyl)but-3-en-1-yl)quinoline (12)

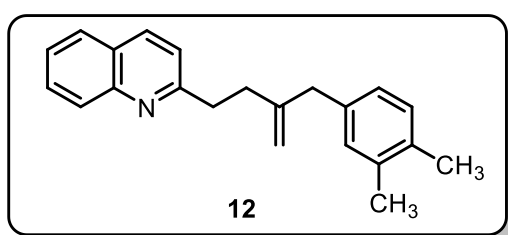

According to the general procedure, **12** was obtained as a yellow liquid (39 mg, 64% yield).  **$^1\text{H}$  NMR (400 MHz,  $\text{CDCl}_3$ )**  $\delta$  8.03 (d,  $J = 8.4$  Hz, 2H), 7.78 - 7.73 (m, 1H), 7.69 - 7.64 (m, 1H), 7.49 - 7.45 (m, 1H), 7.23 (d,  $J = 8.8$  Hz, 1H), 7.06 - 7.02 (m, 1H), 6.97 - 6.91 (m, 2H), 4.90 (s, 1H), 4.80 (s, 1H), 3.35 (s, 2H), 3.17 - 3.09 (m, 2H), 2.50 (t,  $J = 8.0$  Hz, 2H), 2.22 (s, 6H).  **$^{13}\text{C}$  NMR (400 MHz,  $\text{CDCl}_3$ )**  $\delta$  162.3, 148.3, 147.9, 137.0, 136.4, 136.2, 134.2, 130.3, 129.6, 129.4, 128.8, 127.5, 126.8, 126.4, 125.7, 121.4, 111.5, 42.9, 37.4, 35.2, 19.8, 19.4. **HRMS (ESI)** calcd for  $[\text{M}+\text{H}]^+$   $\text{C}_{22}\text{H}_{24}\text{N}^+$ ,  $m/z$ : 302.1903, found: 302.1902. **FT-IR (ATR)**: 2956, 1599, 1434, 1362, 1248, 886, 821, 751  $\text{cm}^{-1}$ .

### 2-(3-(2,4,6-trimethylbenzyl)but-3-en-1-yl)quinoline (13)

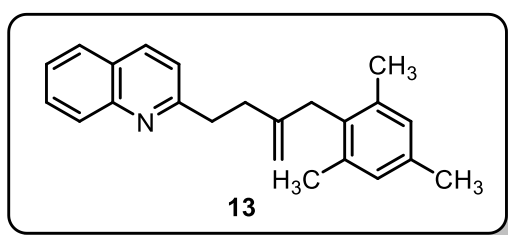

According to the general procedure, **13** was obtained as a yellow liquid (58 mg, 92% yield).  **$^1\text{H}$  NMR (400 MHz,  $\text{CDCl}_3$ )**  $\delta$  7.96 (dd,  $J = 8.4$ , 5.1 Hz, 2H), 7.66 (dd,  $J = 8.0$ , 1.5 Hz, 1H), 7.60 - 7.55 (m, 1H), 7.40 - 7.34 (m, 1H), 7.22 (d,  $J = 8.4$  Hz, 1H), 6.73 (s, 2H), 4.67 (dd,  $J = 3.0$ , 1.5 Hz, 1H), 4.13 (dd,  $J = 3.8$ , 1.9 Hz, 1H), 3.24 (d,  $J = 1.9$  Hz, 2H), 3.18 - 3.11 (m, 2H), 2.61 - 2.54 (m, 2H), 2.15 (s, 3H), 2.09 (s, 6H).  **$^{13}\text{C}$  NMR (400 MHz,  $\text{CDCl}_3$ )**  $\delta$  162.2, 148.0, 146.1, 137.0, 136.3, 135.3, 133.3, 129.5, 128.9, 128.7, 127.6, 126.8, 125.8, 121.3, 109.4, 37.8, 37.2, 35.8, 20.9, 19.8. **HRMS (ESI)** calcd for

$[M+H]^+$   $C_{23}H_{26}N^+$ ,  $m/z$ : 316.2060, found: 316.2055. **FT-IR** (ATR): 2915, 1602, 1502, 1429, 1309, 894, 825, 759  $cm^{-1}$ .

### 2-(3-(3,5-di-tert-butylbenzyl)but-3-en-1-yl)quinoline (14)

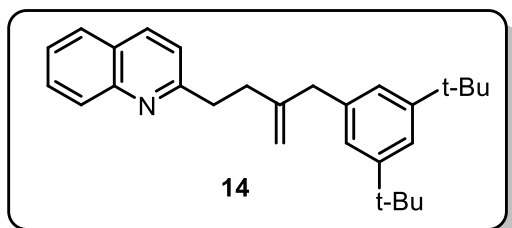

According to the general procedure, **14** was obtained as a yellow liquid (39 mg, 51% yield).

**$^1H$  NMR (400 MHz,  $CDCl_3$ )**  $\delta$  8.05 - 7.99 (m, 2H), 7.74 (dd,  $J = 8.2, 1.4$  Hz, 1H), 7.68 - 7.64 (m, 1H), 7.48 - 7.43 (m, 1H), 7.27 (t,  $J = 1.9$  Hz,

1H), 7.20 (d,  $J = 8.4$  Hz, 1H), 7.05 (d,  $J = 1.9$  Hz, 2H), 4.91 (d,  $J = 1.6$  Hz, 1H), 4.81 (d,  $J = 2.0$  Hz, 1H), 3.42 (s, 2H), 3.17 - 3.10 (m, 2H), 2.56 - 2.50 (m, 2H), 1.31 (s, 18H).  **$^{13}C$  NMR (101 MHz,  $CDCl_3$ )**  $\delta$  162.4, 150.6, 148.4, 148.0, 138.6, 136.2, 129.4, 128.9, 127.5, 126.8, 125.7, 123.3, 121.3, 120.0, 111.7, 43.8, 37.6, 35.4, 34.8, 31.6. **HRMS (ESI)** calcd for  $[M+H]^+$   $C_{28}H_{36}N^+$ ,  $m/z$ : 386.2842, found: 386.2839. **FT-IR** (ATR): 2923, 2253, 1643, 1600, 1445, 1377, 1038, 893, 823, 751  $cm^{-1}$ .

### 2-(3-(3,5-dimethoxybenzyl)but-3-en-1-yl)quinoline (15)

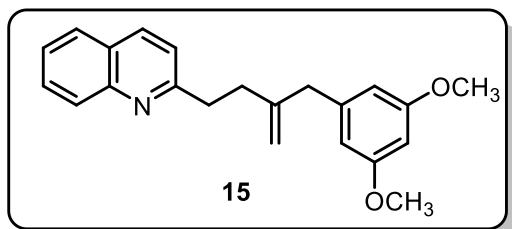

According to the general procedure, **15** was obtained as a yellow liquid (48 mg, 72% yield).

**$^1H$  NMR (400 MHz,  $CDCl_3$ )**  $\delta$  8.02 (dd,  $J = 8.6, 2.8$  Hz, 2H), 7.75 (dd,  $J = 8.2, 1.5$  Hz, 1H), 7.68 - 7.64 (m, 1H), 7.48 - 7.44 (m, 1H), 7.22 (d,  $J =$

8.4 Hz, 1H), 6.36 (d,  $J = 2.3$  Hz, 2H), 6.31 (t,  $J = 2.3$  Hz, 1H), 4.93 (d,  $J = 1.2$  Hz, 1H), 4.84 (d,  $J = 1.6$  Hz, 1H), 3.75 (s, 6H), 3.35 (s, 2H), 3.16 - 3.08 (m, 2H), 2.51 (t,  $J = 8.0$  Hz, 2H).  **$^{13}C$  NMR (101 MHz,  $CDCl_3$ )**  $\delta$  162.2, 160.8, 147.9, 147.6, 142.0, 136.2, 129.4, 128.8, 127.5, 126.8, 125.8, 121.3, 112.0, 107.1, 98.2, 55.3, 43.6, 37.4, 35.1. **HRMS (ESI)** calcd for  $[M+H]^+$   $C_{22}H_{24}NO_2^+$ ,  $m/z$ : 334.1802, found: 334.1799. **FT-IR** (ATR): 2929, 1595, 1459, 1200, 1149, 1061, 825, 753  $cm^{-1}$ .

### 2-(3-((2,2-difluorobenzo[d][1,3]dioxol-5-yl)methyl)but-3-en-1-yl)quinoline (16)



- 7.40 (m, 3H), 7.33 (dd,  $J = 8.4, 1.8$  Hz, 1H), 7.18 (d,  $J = 8.4$  Hz, 1H), 4.97 (d,  $J = 1.6$  Hz, 1H), 4.87 - 4.83 (m, 1H), 3.57 (s, 2H), 3.18 - 3.12 (m, 2H), 2.56 - 2.50 (t,  $J = 8.4$  Hz, 2H).  **$^{13}\text{C}$  NMR (101 MHz,  $\text{CDCl}_3$ )**  $\delta$  162.1, 147.9, 147.9, 137.1, 136.3, 133.6, 132.2, 129.4, 128.8, 127.9, 127.7, 127.7, 127.6, 127.5, 127.4, 126.8, 125.9, 125.8, 125.3, 121.3, 112.1, 43.5, 37.4, 35.3. **HRMS (ESI)** calcd for  $[\text{M}+\text{H}]^+$   $\text{C}_{24}\text{H}_{22}\text{N}^+$ ,  $m/z$ : 324.1747, found: 324.1751. **FT-IR (ATR)**: 2914, 1599, 1503, 1430, 1310, 893, 778  $\text{cm}^{-1}$ .

### 2-(3-((ferrocenyl)methyl)but-3-en-1-yl)quinoline (19)

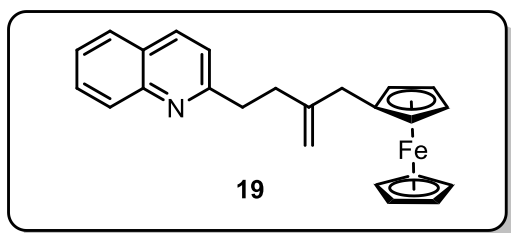

According to the general procedure, **19** was obtained as a yellow liquid (46 mg, 60% yield).  **$^1\text{H}$  NMR (400 MHz,  $\text{CDCl}_3$ )**  $\delta$  8.05 (dd,  $J = 8.4, 1.6$  Hz, 2H), 7.77 (dd,  $J = 8.1, 1.5$  Hz, 1H), 7.70 - 7.66 (m, 1H), 7.50 - 7.46 (m, 1H), 7.26 (d,  $J = 8.4$  Hz, 1H), 4.74 (d,  $J = 1.6$  Hz, 1H), 4.68 (d,  $J = 1.7$  Hz, 1H), 4.18 - 4.12 (m, 1H), 4.09 (s, 6H), 4.06 (t,  $J = 1.8$  Hz, 2H), 3.16 (s, 2H), 3.12 - 3.02 (m, 2H), 2.51 (t,  $J = 8.0$  Hz, 2H).  **$^{13}\text{C}$  NMR (101 MHz,  $\text{CDCl}_3$ )**  $\delta$  162.3, 148.9, 147.9, 136.2, 129.4, 128.8, 127.5, 126.8, 125.8, 121.4, 110.3, 86.3, 69.1, 68.6, 67.5, 37.5, 37.4, 35.6. **HRMS (ESI)** calcd for  $[\text{M}+\text{H}]^+$   $\text{C}_{24}\text{H}_{24}\text{FeN}^+$ ,  $m/z$ : 382.1247, found: 382.1242. **FT-IR (ATR)**: 2918, 1602, 1498, 1432, 892, 823, 743  $\text{cm}^{-1}$ .

### 2-(3-(thiophen-3-ylmethyl)but-3-en-1-yl)quinoline (20)

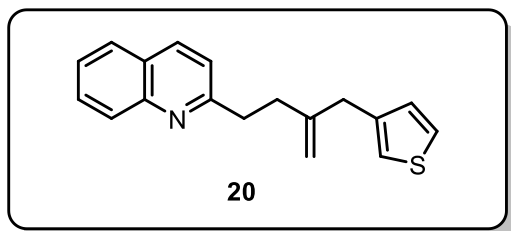

According to the general procedure, **20** was obtained as a yellow liquid (38 mg, 68% yield).  **$^1\text{H}$  NMR (400 MHz,  $\text{CDCl}_3$ )**  $\delta$  8.07 - 8.03 (m, 2H), 7.77 (dd,  $J = 8.1, 1.5$  Hz, 1H), 7.71 - 7.66 (m, 1H), 7.51 - 7.46 (m, 1H), 7.33 (dd,  $J = 1.9, 0.9$  Hz, 1H), 7.26 (d,  $J = 8.4$  Hz, 1H), 6.30 (dd,  $J = 3.2, 1.9$  Hz, 1H), 6.08 (dd,  $J = 3.1, 0.9$  Hz, 1H), 4.93 (d,  $J = 1.8$  Hz, 1H), 4.86 (dd,  $J = 2.2, 1.1$  Hz, 1H), 3.44 (s, 2H), 3.16 - 3.09 (m, 2H), 2.55 (t, 2H).  **$^{13}\text{C}$  NMR (101 MHz,  $\text{CDCl}_3$ )**  $\delta$  162.6, 153.5, 147.8, 146.1, 141.4, 135.8, 129.4, 128.4, 127.5, 126.8, 125.8, 121.3, 112.2, 110.3, 106.5, 37.3, 35.6, 35.3. **HRMS (ESI)** calcd for  $[\text{M}+\text{H}]^+$   $\text{C}_{18}\text{H}_{18}\text{NS}^+$ ,  $m/z$ : 280.1154, found: 280.1156. **FT-IR (ATR)**: 3362, 2920, 2851, 1718, 1659, 1426, 1263, 734, 704  $\text{cm}^{-1}$ .

### 2-(3-(furan-2-ylmethyl)but-3-en-1-yl)quinoline (21)

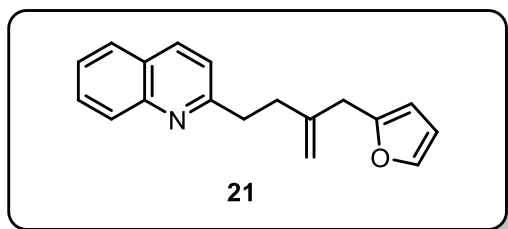

According to the general procedure, **21** was obtained as a yellow liquid (22 mg, 42% yield).

**<sup>1</sup>H NMR (400 MHz, CDCl<sub>3</sub>)** δ 8.08 - 8.00 (m, 2H), 7.76 (dd, *J* = 8.1, 1.5 Hz, 1H), 7.70 - 7.65 (m, 1H), 7.50 - 7.45 (m, 1H), 7.26 - 7.24 (m, 1H),

7.23 (t, *J* = 2.5 Hz, 1H), 6.99 - 6.96 (m, 1H), 6.92 (dd, *J* = 4.9, 1.3 Hz, 1H), 4.91 (d, *J* = 1.7 Hz, 1H), 4.82 (d, *J* = 1.3 Hz, 1H), 3.43 (s, 2H), 3.18 - 3.07 (m, 2H), 2.53 (t, *J* = 8.0 Hz, 2H). **<sup>13</sup>C NMR (101 MHz, CDCl<sub>3</sub>)** δ 161.2, 147.9, 147.2, 140.0, 135.9, 129.4, 128.8, 128.7, 127.5, 126.8, 125.8, 125.3, 121.4, 121.3, 111.5, 37.7, 37.4, 35.3. **HRMS (ESI)** calcd for [M+H]<sup>+</sup> C<sub>18</sub>H<sub>18</sub>NO<sup>+</sup>, *m/z*: 264.1383, found: 264.1380. **FT-IR (ATR)**: 3053, 2922, 1600, 1504, 1427, 895, 818, 754 cm<sup>-1</sup>.

### 2-(3-(pyridin-3-ylmethyl)but-3-en-1-yl)quinoline (22)

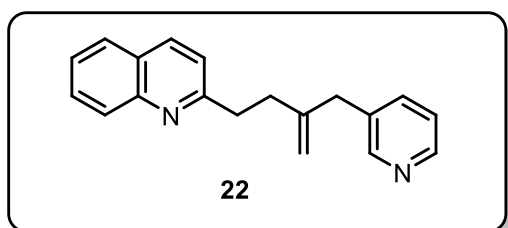

According to the general procedure, **22** was obtained as a yellow liquid (27 mg, 49% yield).

**<sup>1</sup>H NMR (400 MHz, CDCl<sub>3</sub>)** δ 8.50 - 8.40 (m, 2H), 8.04 (dd, *J* = 8.5, 5.7 Hz, 2H), 7.76 (dd, *J* = 8.1, 1.5 Hz, 1H), 7.70 - 7.65 (m, 1H), 7.52 - 7.44

(m, 2H), 7.26 - 7.15 (m, 2H), 4.96 (d, *J* = 1.6 Hz, 1H), 4.77 (d, *J* = 1.2 Hz, 1H), 3.39 (s, 2H), 3.18 - 3.09 (m, 2H), 2.51 (t, *J* = 8.0 Hz, 2H). **<sup>13</sup>C NMR (101 MHz, CDCl<sub>3</sub>)** δ 161.8, 150.4, 147.9, 147.7, 147.0, 136.5, 136.3, 134.9, 129.5, 128.8, 127.5, 126.8, 125.8, 123.3, 121.2, 112.5, 40.3, 37.2, 35.2. **HRMS (ESI)** calcd for [M+H]<sup>+</sup> C<sub>19</sub>H<sub>19</sub>N<sub>2</sub><sup>+</sup>, *m/z*: 275.1543, found: 275.1539. **FT-IR (ATR)**: 3740, 3357, 2921, 2852, 1642, 1424, 748 cm<sup>-1</sup>.

### 2-(3-methylenenonyl)quinoline (23)

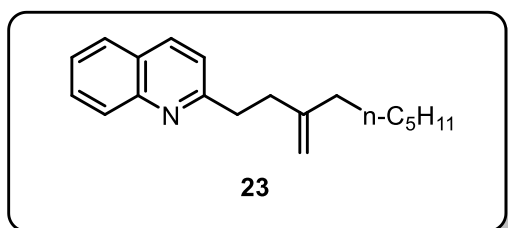

According to the general procedure, **23** was obtained as a yellow liquid (36 mg, 67% yield).

**<sup>1</sup>H NMR (400 MHz, CDCl<sub>3</sub>)** δ 8.00 - 7.96 (m, 2H), 7.69 (dd, *J* = 8.2, 1.5 Hz, 1H), 7.62 - 7.57 (m, 1H), 7.43 - 7.37 (m, 1H), 7.23 (d, *J* = 8.5 Hz,

1H), 4.72 (d, *J* = 1.7 Hz, 1H), 4.69 (d, *J* = 1.7 Hz, 1H), 3.09 - 3.01 (m, 2H), 2.49 - 2.41 (m,

2H), 2.05 - 1.98 (m, 2H), 1.41 - 1.34 (m, 2H), 1.24 - 1.18 (m, 6H), 0.83 - 0.77 (m, 3H).  $^{13}\text{C}$  NMR (101 MHz,  $\text{CDCl}_3$ )  $\delta$  162.5, 149.7, 147.9, 136.2, 129.4, 128.8, 127.5, 126.8, 125.7, 121.4, 108.8, 37.6, 36.4, 35.9, 31.8, 29.1, 27.8, 22.7, 14.1. HRMS (ESI) calcd for  $[\text{M}+\text{H}]^+$   $\text{C}_{19}\text{H}_{26}\text{N}^+$ ,  $m/z$ : 268.2060, found: 268.2061. FT-IR (ATR): 2924, 1602, 1503, 1432, 1114, 887, 822, 752  $\text{cm}^{-1}$ .

### 2-(3-(cyclohexylmethyl)but-3-en-1-yl)quinoline (24)

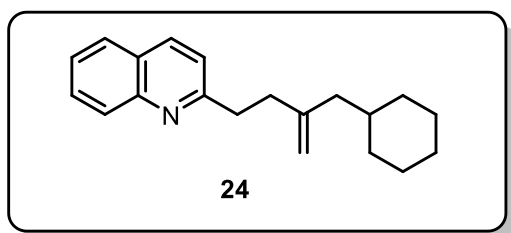

According to the general procedure, **24** was obtained as a yellow liquid (41 mg, 74% yield).  $^1\text{H}$  NMR (400 MHz,  $\text{CDCl}_3$ )  $\delta$  8.05 (dd,  $J = 8.4$ , 2.1 Hz, 2H), 7.77 (dd,  $J = 8.1$ , 1.5 Hz, 1H), 7.70 - 7.65 (m, 1H), 7.50 - 7.45 (m, 1H), 7.30 (d,  $J = 8.4$  Hz, 1H), 4.83 (dd,  $J = 3.6$ , 1.6 Hz, 1H), 4.73 (dd,  $J = 2.0$ , 0.8 Hz, 1H), 3.15 - 3.09 (m, 2H), 2.51 (t,  $J = 8.2$  Hz, 2H), 1.98 (dd,  $J = 7.2$ , 0.8 Hz, 2H), 1.72 - 1.65 (m, 4H), 1.51 - 1.42 (m, 1H), 1.30 - 1.08 (m, 4H), 0.90 - 0.79 (m, 2H).  $^{13}\text{C}$  NMR (101 MHz,  $\text{CDCl}_3$ )  $\delta$  162.5, 149.0, 147.3, 136.2, 129.4, 128.8, 127.5, 126.8, 125.7, 121.0, 110.7, 44.8, 37.5, 35.6, 35.6, 33.4, 26.6, 26.4. HRMS (ESI) calcd for  $[\text{M}+\text{H}]^+$   $\text{C}_{20}\text{H}_{26}\text{N}^+$ ,  $m/z$ : 280.2060, found: 280.2063. FT-IR (ATR): 2918, 1600, 1495, 1447, 1118, 890, 830, 700  $\text{cm}^{-1}$ .

### 2-(3-((tetrahydro-2H-pyran-4-yl)methyl)but-3-en-1-yl)quinoline (25)

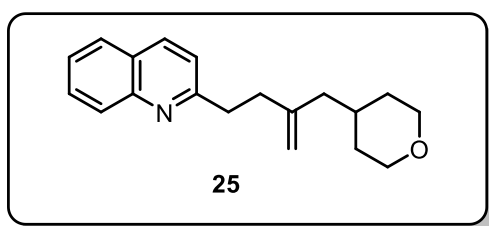

According to the general procedure, **25** was obtained as a yellow liquid (45 mg, 80% yield).  $^1\text{H}$  NMR (400 MHz,  $\text{CDCl}_3$ )  $\delta$  7.96 (dd,  $J = 8.4$ , 2.3 Hz, 2H), 7.67 (dd,  $J = 8.2$ , 1.5 Hz, 1H), 7.61 - 7.56 (m, 1H), 7.40 - 7.36 (m, 1H), 7.20 (d,  $J = 8.4$  Hz, 1H), 4.79 (d,  $J = 1.6$  Hz, 1H), 4.67 (d,  $J = 1.6$  Hz, 1H), 3.83 (dd,  $J = 12.0$ , 4.0 Hz, 2H), 3.24 (td,  $J = 11.8$ , 2.1 Hz, 2H), 3.07 - 3.00 (m, 2H), 2.44 (t,  $J = 8.0$  Hz, 2H), 1.94 (d,  $J = 7.2$  Hz, 2H), 1.65 - 1.55 (m, 1H), 1.49 - 1.45 (m, 2H), 1.18 - 1.11 (m, 2H).  $^{13}\text{C}$  NMR (101 MHz,  $\text{CDCl}_3$ )  $\delta$  162.2, 147.9, 146.2, 136.2, 129.4, 128.8, 127.5, 126.8, 125.8, 121.4, 111.4, 68.0, 44.2, 37.4, 35.5, 33.1, 32.9. HRMS (ESI) calcd for  $[\text{M}+\text{H}]^+$   $\text{C}_{19}\text{H}_{24}\text{NO}^+$ ,  $m/z$ : 282.1852, found: 282.1857. FT-IR (ATR): 2922, 1600, 1504, 1428, 894, 819, 752  $\text{cm}^{-1}$ .

### 2-(3-methylene-6-phenylhexyl)quinoline (26)

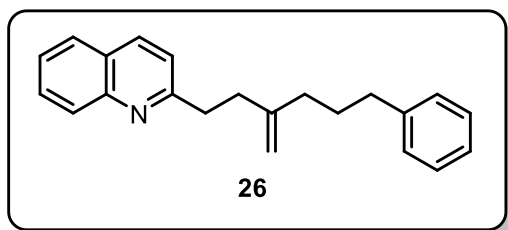

According to the general procedure, **26** was obtained as a yellow liquid (56 mg, 93% yield).

**<sup>1</sup>H NMR (400 MHz, CDCl<sub>3</sub>)** δ 8.03 (dd, *J* = 12.3, 8.5 Hz, 2H), 7.74 (dd, *J* = 8.1, 1.5 Hz, 1H), 7.68 - 7.63 (m, 1H), 7.48 - 7.43 (m, 1H), 7.26 (dd, *J* =

8.4, 6.2 Hz, 3H), 7.19 - 7.13 (m, 3H), 4.84 (d, *J* = 1.8 Hz, 1H), 4.79 (s, 1H), 3.15 - 3.07 (m, 2H), 2.61 (t, *J* = 7.8 Hz, 2H), 2.54 (t, *J* = 7.8 Hz, 2H), 2.14 (t, *J* = 7.8 Hz, 2H), 1.84 - 1.75 (m, 2H). **<sup>13</sup>C NMR (101 MHz, CDCl<sub>3</sub>)** δ 148.6, 147.6, 142.0, 136.3, 129.4, 128.9, 128.3, 127.6, 126.8, 125.8, 121.0, 109.7, 37.6, 35.9, 35.9, 35.6, 29.6. **HRMS (ESI)** calcd for [M+H]<sup>+</sup> C<sub>22</sub>H<sub>24</sub>N<sup>+</sup>, *m/z*: 302.1903, found: 302.1900. **FT-IR (ATR)**: 2928, 1601, 1500, 1434, 822, 746, 699 cm<sup>-1</sup>.

### 2-(6,10-dimethyl-3-methyleneundec-9-en-1-yl)quinoline (27)

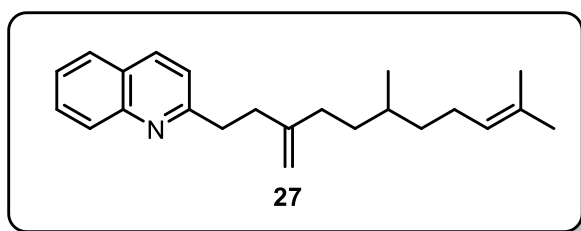

According to the general procedure, **27** was obtained as a yellow liquid (40 mg, 62% yield). **<sup>1</sup>H NMR (400 MHz, CDCl<sub>3</sub>)** δ 8.05 (dd, *J* = 8.5, 2.9 Hz, 2H), 7.77 (dd, *J* = 8.1, 1.5 Hz, 1H), 7.70 - 7.65 (m, 1H), 7.50 -

7.45 (m, 1H), 7.30 (d, *J* = 8.4 Hz, 1H), 5.12 - 5.06 (m, 1H), 4.80 (d, *J* = 1.7 Hz, 1H), 4.77 (d, *J* = 1.7 Hz, 1H), 3.18 - 3.06 (m, 2H), 2.54 (t, *J* = 8.0 Hz, 2H), 2.14 - 2.05 (m, 2H), 2.02 - 1.90 (m, 2H), 1.70 - 1.66 (m, 4H), 1.60 (d, *J* = 1.3 Hz, 3H), 1.52-1.38 (m, 2H), 1.37- 1.25 (m, 2H), 1.19 - 1.10 (m, 1H), 0.89 (d, *J* = 6.4 Hz, 3H). **<sup>13</sup>C NMR (101 MHz, CDCl<sub>3</sub>)** δ 162.8, 149.5, 147.9, 136.2, 131.1, 129.4, 128.9, 127.5, 126.8, 125.7, 124.2, 121.4, 109.1, 37.7, 37.1, 36.0, 35.1, 33.9, 32.3, 25.8, 25.6, 19.5, 17.7. **HRMS (ESI)** calcd for [M+H]<sup>+</sup> C<sub>23</sub>H<sub>32</sub>N<sup>+</sup>, *m/z*: 322.2529, found: 322.2528. **FT-IR (ATR)**: 2921, 1509, 1418, 1098, 986, 852, 629 cm<sup>-1</sup>.

### 2-(3-methylene-4-phenylpentyl)quinoline (28)

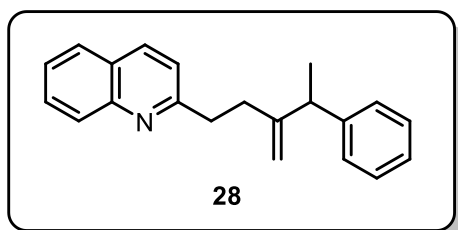

According to the general procedure, **28** was obtained as a yellow liquid (35 mg, 61% yield). **<sup>1</sup>H NMR (400 MHz, CDCl<sub>3</sub>)** δ 8.01 (d, *J* = 8.4 Hz, 2H), 7.75 (dd, *J* = 8.1, 1.5 Hz, 1H), 7.69 - 7.63 (m, 1H), 7.50 - 7.44 (m, 1H), 7.29 - 7.26 (m, 1H), 7.26 - 7.14 (m, 5H), 5.00 (d, *J* = 1.2 Hz, 2H), 3.49 (dd, *J* = 14.0, 7.2 Hz, 1H), 3.14 - 3.01 (m, 2H), 2.50 - 2.33 (m, 2H), 1.39 (d, *J* = 7.0 Hz, 3H). **<sup>13</sup>C NMR (101 MHz, CDCl<sub>3</sub>)** δ 162.3, 152.1, 148.3, 145.2, 136.2, 129.4, 128.8, 128.3, 127.6, 127.5, 126.7, 126.2, 125.7, 121.3, 109.4, 45.6, 37.6, 34.7, 20.7. **HRMS (ESI)** calcd for [M+H]<sup>+</sup> C<sub>21</sub>H<sub>22</sub>N<sup>+</sup>, *m/z*: 288.1752, found: 288.1754. **FT-IR (ATR)**: 2965, 2928, 1599, 1503, 1492, 1451, 898, 823, 751, 700 cm<sup>-1</sup>.

### 2-(3-benzhydrylbut-3-en-1-yl)quinoline (**29**)

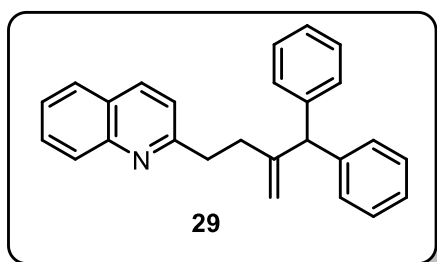

According to the general procedure, **29** was obtained as a yellow liquid (45 mg, 65% yield). **<sup>1</sup>H NMR (400 MHz, CDCl<sub>3</sub>)** δ 8.03 (d, *J* = 8.4 Hz, 2H), 7.76 (dd, *J* = 8.1, 1.5 Hz, 1H), 7.71 - 7.66 (m, 1H), 7.50 - 7.45 (m, 1H), 7.30 - 7.23 (m, 5H), 7.22 - 7.20 (m, 1H), 7.19 (d, *J* = 2.5 Hz, 1H), 7.18 - 7.14 (m, 4H), 5.18 (s, 1H), 4.86 (s, 1H), 4.54 (s, 1H), 3.22 - 3.12 (m, 2H), 2.59 (t, *J* = 8.0 Hz, 2H). **<sup>13</sup>C NMR (101 MHz, CDCl<sub>3</sub>)** δ 162.0, 150.9, 147.9, 142.3, 136.2, 129.4, 129.4, 128.8, 128.3, 127.5, 126.8, 126.3, 125.8, 121.3, 114.4, 57.6, 37.7, 35.9. **HRMS (ESI)** calcd for [M+H]<sup>+</sup> C<sub>26</sub>H<sub>24</sub>N<sup>+</sup>, *m/z*: 350.1909, found: 350.1908. **FT-IR (ATR)**: 3057, 3025, 1598, 1497, 1427, 902, 824, 745, 699 cm<sup>-1</sup>.

### 2-(3-cyclohexylbut-3-en-1-yl)quinoline (**30**)

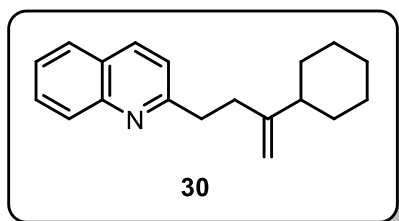

According to the general procedure, **30** was obtained as a yellow liquid (24 mg, 45% yield). **<sup>1</sup>H NMR (400 MHz, CDCl<sub>3</sub>)** δ 8.06 (t, *J* = 8.3 Hz, 2H), 7.78 (dd, *J* = 8.2, 1.5 Hz, 1H), 7.71 - 7.66 (m, 1H), 7.52 - 7.45 (m, 1H), 7.31 (d, *J* = 8.4 Hz, 1H), 4.82 - 4.74 (m, 2H), 3.17 - 3.05 (m, 2H), 2.62 - 2.48 (m, 2H), 2.00 - 1.88 (m, 1H), 1.84 - 1.74 (m, 4H), 1.71 - 1.65 (m, 1H), 1.28 - 1.10 (m, 5H). **<sup>13</sup>C NMR (101 MHz, CDCl<sub>3</sub>)** δ 162.6, 154.5, 148.2, 136.2, 129.4, 128.8,

127.5, 126.8, 125.7, 121.4, 107.3, 44.5, 38.0, 34.8, 32.5, 26.8, 26.4. **HRMS (ESI)** calcd for  $[M+H]^+$   $C_{19}H_{24}N^+$ ,  $m/z$ : 266.1909, found: 266.1908. **FT-IR (ATR)**: 2924, 2852, 1640, 1600, 1503, 1447, 886, 825, 753  $cm^{-1}$ .

**2-(3-(((8S,9S,13R,14S,17S)-3-(benzyloxy)-13-methyl-7,8,9,11,12,13,14,15,16,17-decahydro-6H-cyclopenta[a]phenanthren-17-yl)methyl)but-3-en-1-yl)quinoline (31)**

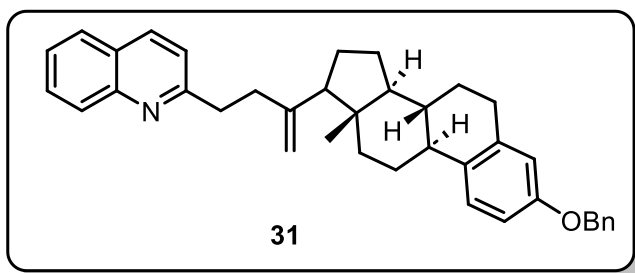

According to the general procedure, **31** was obtained as a white solid (51 mg, 47% yield). **m.p.** = 129.0-132.8 °C.  **$^1H$  NMR (400 MHz,  $CDCl_3$ )**  $\delta$  8.06 (dd,  $J$  = 8.5, 2.6 Hz, 2H), 7.77 (dd,  $J$  = 8.1, 1.5 Hz, 1H), 7.71 - 7.65 (m, 1H), 7.50 - 7.45

(m, 1H), 7.44 - 7.40 (m, 2H), 7.39 - 7.34 (m, 2H), 7.33 - 7.28 (m, 2H), 7.18 (d,  $J$  = 8.5 Hz, 1H), 6.76 (dd,  $J$  = 8.6, 2.8 Hz, 1H), 6.71 (d,  $J$  = 2.8 Hz, 1H), 5.02 (s, 2H), 5.00 (d,  $J$  = 1.6 Hz, 1H), 4.87 (s, 1H), 3.21 - 3.10 (m, 2H), 2.89 - 2.78 (m, 2H), 2.70 - 2.59 (m, 1H), 2.56 - 2.46 (m, 1H), 2.30 - 2.16 (m, 3H), 1.97 (dd,  $J$  = 8.5, 2.6 Hz, 1H), 1.92 - 1.72 (m, 5H), 1.51 - 1.43 (m, 2H), 1.40 - 1.35 (m, 2H), 0.91 - 0.84 (m, 1H), 0.62 (s, 3H).  **$^{13}C$  NMR (101 MHz,  $CDCl_3$ )**  $\delta$  162.6, 156.7, 148.5, 148.0, 138.1, 137.4, 136.2, 133.2, 129.4, 128.9, 128.6, 127.9, 127.5, 127.5, 126.8, 126.3, 125.7, 121.5, 114.8, 112.3, 110.3, 70.0, 56.4, 55.4, 43.9, 43.7, 39.2, 38.9, 38.2, 37.6, 31.6, 29.9, 27.7, 26.8, 26.0, 23.9, 22.7, 14.2, 13.0. **HRMS (ESI)** calcd for  $[M+H]^+$   $C_{38}H_{42}NO^+$ ,  $m/z$ : 528.3266, found: 528.3270. **FT-IR (ATR)**: 2921, 2855, 1600, 1499, 1235, 1048, 888, 827, 734, 695  $cm^{-1}$ .

**2-(3-(((1S,3R)-3-methylcyclopentadecyl)methyl)but-3-en-1-yl)quinoline (32)**

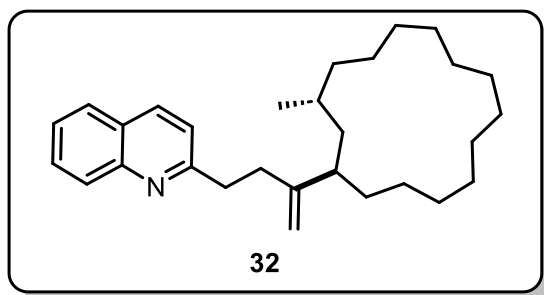

According to the general procedure, **32** was obtained as a yellow liquid (26 mg, 31% yield, d.r.  $\approx$  1.5:1).  **$^1H$  NMR (400 MHz,  $CDCl_3$ )**  $\delta$  8.06 (t,  $J$  = 9.0 Hz, 2H), 7.78 (dd,  $J$  = 8.0, 1.5 Hz, 1H), 7.71 - 7.66 (m, 1H), 7.48 (t,  $J$  = 7.5 Hz, 1H), 7.32 (dd,  $J$  = 8.4, 2.3 Hz, 1H), 4.87

(dd,  $J$  = 7.9, 1.7 Hz, 1H), 4.82 (s, 1H), 3.19 - 3.10 (m, 2H), 2.53 - 2.44 (m, 2H), 2.20 - 2.12 (m, 1H), 1.58 - 1.48 (m, 2H), 1.39 - 1.24 (m, 25H), 0.84 (dd,  $J$  = 6.7, 1.5 Hz, 3H).  **$^{13}C$  NMR**

(101 MHz, CDCl<sub>3</sub>)  $\delta$  162.6, 153.2(isomers), 152.4, 147.9, 136.2, 129.4, 128.8, 127.5, 126.8, 125.7, 121.4, 121.4(isomers), 109.1, 108.4(isomers), 43.9(isomers), 43.5, 42.7(isomers), 40.0, 37.7(isomers), 37.6, 35.2, 33.6(isomers), 33.2(isomers), 32.7, 32.6, 30.1(isomers), 29.8, 29.3, 27.5, 27.2(isomers), 27.1, 26.9(isomers), 26.8, 26.7(isomers), 26.7, 26.6(isomers), 26.6, 26.6(isomers), 25.5(isomers), 25.4, 24.8, 23.6, 21.4(isomers), 21.1. **HRMS (ESI)** calcd for [M+H]<sup>+</sup> C<sub>29</sub>H<sub>44</sub>N<sup>+</sup>, m/z: 406.3474, found: 406.3475. **FT-IR (ATR):** 2923, 2854, 1601, 1502, 1457, 1312, 967, 887, 824, 750 cm<sup>-1</sup>.

### 2-(3-benzylbut-3-en-1-yl)-6-methylquinoline (33)

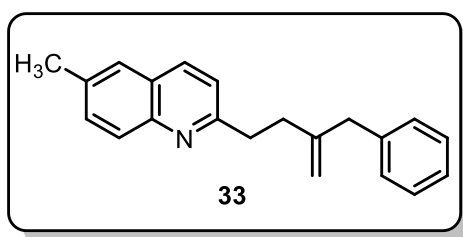

According to the general procedure, **33** was obtained as a yellow liquid (32 mg, 56% yield). **<sup>1</sup>H NMR (400 MHz, CDCl<sub>3</sub>)**  $\delta$  7.93 (dd,  $J = 11.1, 8.4$  Hz, 2H), 7.54 - 7.48 (m, 2H), 7.31 - 7.26 (m, 2H), 7.22 - 7.17 (m, 4H), 4.91 (d,  $J = 1.7$  Hz, 1H), 4.79 (d,  $J = 1.8$  Hz, 1H), 3.41 (s, 2H), 3.14 - 3.08 (m, 2H), 2.51 (s, 3H), 2.48 (t,  $J = 8.0, 2$ H). **<sup>13</sup>C NMR (101 MHz, CDCl<sub>3</sub>)**  $\delta$  161.2, 148.1, 146.5, 139.6, 135.6, 135.5, 131.6, 129.1, 128.5, 128.3, 126.8, 126.4, 126.1, 121.3, 111.8, 43.3, 37.3, 35.3, 21.5. **HRMS (ESI)** calcd for [M+H]<sup>+</sup> C<sub>21</sub>H<sub>22</sub>N<sup>+</sup>, m/z: 288.1747, found: 288.1742. **FT-IR (ATR):** 2917, 1597, 1492, 1440, 1315, 890, 824, 745, 699 cm<sup>-1</sup>.

### 2-(3-benzylbut-3-en-1-yl)-6-methoxyquinoline (34)

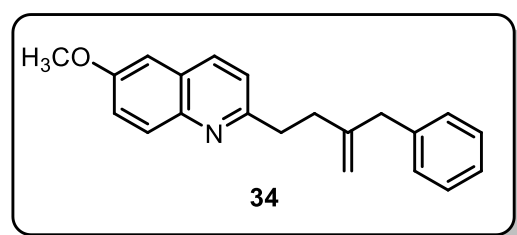

According to the general procedure, **34** was obtained as a yellow liquid (28 mg, 46% yield). **<sup>1</sup>H NMR (400 MHz, CDCl<sub>3</sub>)**  $\delta$  7.90 (t,  $J = 8.1$  Hz, 2H), 7.28 (dd,  $J = 9.2, 2.8$  Hz, 1H), 7.23 - 7.19 (m, 2H), 7.15 - 7.10 (m, 4H), 6.97 (d,  $J = 2.8$  Hz, 1H), 4.84 (d,  $J = 1.7$  Hz, 1H), 4.72 (d,  $J = 1.8$  Hz, 1H), 3.85 (s, 3H), 3.34 (s, 2H), 3.08 - 3.02 (m, 2H), 2.42 (t,  $J = 8.0$  Hz, 2H). **<sup>13</sup>C NMR (101 MHz, CDCl<sub>3</sub>)**  $\delta$  159.4, 157.4, 148.0, 143.5, 139.6, 135.6, 129.8, 129.1, 128.3, 127.7, 126.1, 122.2, 121.5, 111.9, 105.2, 55.5, 43.3, 36.8, 35.2. **HRMS (ESI)** calcd for [M+H]<sup>+</sup> C<sub>21</sub>H<sub>22</sub>NO<sup>+</sup>, m/z: 304.1696, found: 304.1694. **FT-IR (ATR):** 2919, 1608, 1499, 1225, 1102, 869, 825, 738, 698 cm<sup>-1</sup>.

### 2-(3-benzylbut-3-en-1-yl)-6-fluoroquinoline (35)

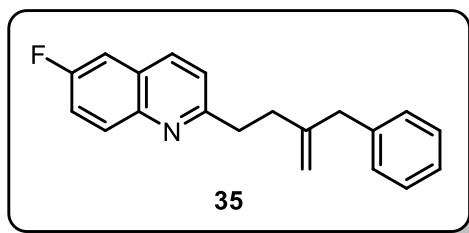

According to the general procedure, **35** was obtained as a yellow liquid (33 mg, 57% yield). **<sup>1</sup>H NMR (400 MHz, CDCl<sub>3</sub>)** δ 8.02 (dd, *J* = 9.3, 5.3 Hz, 1H), 7.94 (d, *J* = 8.5 Hz, 1H), 7.38 (td, *J* = 8.8, 2.9 Hz, 1H), 7.31 (dd, *J* = 8.8, 2.8 Hz, 1H), 7.19 (t, 3H), 7.14 - 7.09 (m, 3H), 4.83 (d, *J* = 1.8 Hz, 1H), 4.72 (d, *J* = 1.8 Hz, 1H), 3.34 (s, 2H), 3.11 - 3.04 (m, 2H), 2.43 (t, *J* = 8.0 Hz, 2H). **<sup>13</sup>C NMR (101 MHz, CDCl<sub>3</sub>)** δ 161.38, 158.9, 147.8, 144.3, 139.5, 136.1 (d, *J*<sub>C-F</sub> = 5.2 Hz), 130.8 (d, *J*<sub>C-F</sub> = 9.1 Hz), 129.1, 128.3, 127.3 (d, *J*<sub>C-F</sub> = 10.1 Hz), 126.2, 122.1, 119.8 (d, *J*<sub>C-F</sub> = 25.8 Hz), 112.0, 110.5 (d, *J*<sub>C-F</sub> = 21.7 Hz), 43.3, 36.8, 35.0. **<sup>19</sup>F NMR (376 MHz, CDCl<sub>3</sub>)** δ -114.25. **HRMS (ESI)** calcd for [M+H]<sup>+</sup> C<sub>20</sub>H<sub>19</sub>FN<sup>+</sup>, *m/z*: 292.1496, found: 292.1492. **FT-IR (ATR)**: 2918, 1608, 1498, 1225, 1141, 871, 829, 739, 699 cm<sup>-1</sup>.

### 2-(3-benzylbut-3-en-1-yl)-1,2,3,4-tetrahydroquinoline (36)

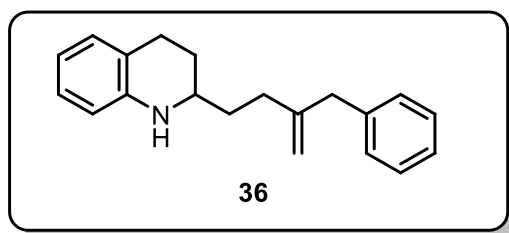

According to the general procedure, **36** was obtained as a yellow liquid (50 mg, 90% yield). **<sup>1</sup>H NMR (400 MHz, CDCl<sub>3</sub>)** δ 7.22 - 7.17 (m, 2H), 7.14 - 7.08 (m, 3H), 6.88 - 6.81 (m, 2H), 6.50 (m, 1H), 6.32 (dd, *J* = 7.9, 1.2 Hz, 1H), 4.79 (d, *J* = 3.2 Hz, 1H), 4.72 (d, *J* = 1.8 Hz, 1H), 3.52 (s, 1H), 3.27 (s, 2H), 3.13 - 3.08 (m, 1H), 2.69 - 2.56 (m, 2H), 2.01 - 1.94 (m, 2H), 1.83 - 1.76 (m, 1H), 1.56 - 1.50 (m, 2H), 1.50 - 1.43 (m, 1H). **<sup>13</sup>C NMR (101 MHz, CDCl<sub>3</sub>)** δ 148.6, 144.7, 140.5, 129.3, 129.1, 128.5, 126.8, 126.5, 121.9, 117.1, 114.2, 111.7, 51.3, 43.3, 34.5, 31.5, 28.0, 26.3. **HRMS (ESI)** calcd for [M+H]<sup>+</sup> C<sub>20</sub>H<sub>24</sub>N<sup>+</sup>, *m/z*: 278.1909, found: 278.1907. **FT-IR (ATR)**: 2922, 1713, 1655, 1599, 1500, 1451, 1427, 1113, 824, 751, 700 cm<sup>-1</sup>.

### 2-(3-benzylbut-3-en-1-yl)quinoline 1-oxide (37)

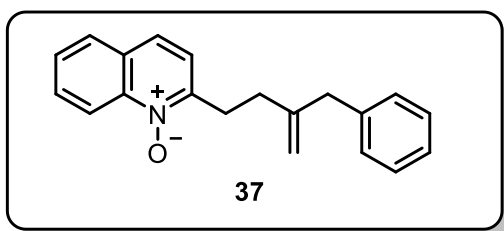

According to the general procedure, **37** was obtained as a colorless liquid (28 mg, 48% yield).

**<sup>1</sup>H NMR (400 MHz, CDCl<sub>3</sub>)** δ 8.70 (d, *J* = 8.7 Hz, 1H), 7.74 (dd, *J* = 8.1, 1.4 Hz, 1H), 7.70 - 7.64 (m, 1H), 7.57 - 7.47 (m, 2H), 7.24 - 7.18 (m,

2H), 7.17 - 7.08 (m, 4H), 4.85 (d, *J* = 1.6 Hz, 1H), 4.77 (d, *J* = 1.8 Hz, 1H), 3.37 (s, 2H), 3.25 - 3.15 (m, 2H), 2.44 (t, *J* = 7.7 Hz, 2H). **<sup>13</sup>C NMR (101 MHz, CDCl<sub>3</sub>)** δ 148.6, 147.4, 141.7, 139.4, 130.3, 129.1, 128.4, 128.0, 127.8, 126.2, 125.1, 121.9, 119.7, 112.2, 43.3, 31.2, 29.7. **HRMS (ESI)** calcd for [M+H]<sup>+</sup> C<sub>20</sub>H<sub>19</sub>NO<sup>+</sup>, *m/z*: 290.1545, found: 290.1547. **FT-IR (ATR)**: 2921, 1638, 1600, 1502, 1429, 1260, 1022, 891, 820, 752 cm<sup>-1</sup>.

### 3-benzyl-1-(quinolin-2-yl)but-3-en-1-yl acetate (**38**)

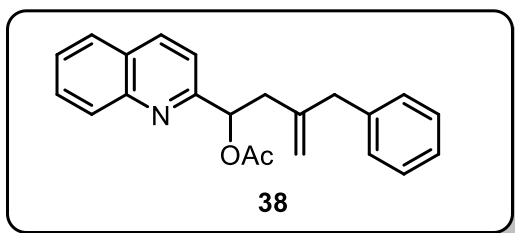

According to the general procedure, **38** was obtained as a yellow liquid (28 mg, 42% yield).

**<sup>1</sup>H NMR (400 MHz, CDCl<sub>3</sub>)** δ 8.14 - 8.08 (m, 2H), 7.79 (dd, *J* = 8.1, 1.5 Hz, 1H), 7.73 - 7.68 (m, 1H), 7.55 - 7.50 (m, 1H), 7.40 (d, *J* = 8.5 Hz,

1H), 7.30 - 7.27 (m, 1H), 7.26 - 7.25 (m, 1H), 7.21 - 7.16 (m, 3H), 6.18 (t, *J* = 7.0 Hz, 1H), 4.92 (dd, *J* = 2.6, 1.0 Hz, 1H), 4.80 (dd, *J* = 3.0, 1.4 Hz, 1H), 3.41 (d, *J* = 4.6 Hz, 2H), 2.72 (dd, *J* = 7.1, 1.0 Hz, 2H), 2.13 (s, 3H). **<sup>13</sup>C NMR (101 MHz, CDCl<sub>3</sub>)** δ 170.4, 159.4, 149.0, 144.3, 139.2, 136.8, 129.6, 129.4, 129.2, 128.4, 127.5, 126.6, 126.2, 118.6, 115.0, 75.4, 43.0, 40.8, 21.2. **HRMS (ESI)** calcd for [M+H]<sup>+</sup> C<sub>22</sub>H<sub>22</sub>NO<sup>+</sup>, *m/z*: 332.1651, found: 332.1651. **FT-IR (ATR)**: 2925, 1594, 1493, 1452, 1243, 1112, 894, 758, 733 cm<sup>-1</sup>.

## 7. Crystal data and structure refinement for **3**

Crystal of **3** was prepared in a mixture solvent system (dichloromethane and hexane), the solution was evaporated at 0°C for about two week, sing crystals were formed.

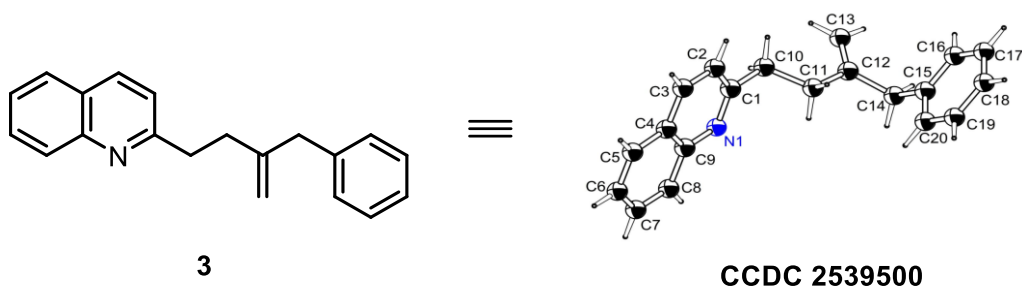

The thermal ellipsoid was drawn at the 50% probability level.

Crystal data and structure refinement for **3**

|                       |                                               |
|-----------------------|-----------------------------------------------|
| CCDC                  | 2539500                                       |
| dentification code    | PHY325                                        |
| Empirical formula     | C <sub>20</sub> H <sub>19</sub> N             |
| Formula weight        | 273.36                                        |
| Temperature/K         | 223.00                                        |
| Crystal system        | orthorhombic                                  |
| Space group           | P2 <sub>1</sub> 2 <sub>1</sub> 2 <sub>1</sub> |
| a/Å                   | 6.0064(2)                                     |
| b/Å                   | 10.9329(4)                                    |
| c/Å                   | 23.1967(9)                                    |
| α/°                   | 90                                            |
| β/°                   | 90                                            |
| γ/°                   | 90                                            |
| Volume/Å <sup>3</sup> | 1523.27(10)                                   |

|                                                |                                                               |
|------------------------------------------------|---------------------------------------------------------------|
| Z                                              | 4                                                             |
| $\rho_{\text{calc}}/\text{cm}^3$               | 1.192                                                         |
| $\mu/\text{mm}^{-1}$                           | 0.069                                                         |
| F(000)                                         | 584.0                                                         |
| Crystal size/ $\text{mm}^3$                    | $0.5 \times 0.4 \times 0.2$                                   |
| Radiation                                      | MoK $\alpha$ ( $\lambda = 0.71073$ )                          |
| $2\Theta$ range for data collection/ $^\circ$  | 4.118 to 54.964                                               |
| Index ranges                                   | $-7 \leq h \leq 7, -13 \leq k \leq 14, -30 \leq l \leq 30$    |
| Reflections collected                          | 17746                                                         |
| Independent reflections                        | 3500 [ $R_{\text{int}} = 0.0391, R_{\text{sigma}} = 0.0304$ ] |
| Data/restraints/parameters                     | 3500/0/190                                                    |
| Goodness-of-fit on F <sup>2</sup>              | 0.978                                                         |
| Final R indexes [ $I \geq 2\sigma(I)$ ]        | $R_1 = 0.0357, wR_2 = 0.1180$                                 |
| Final R indexes [all data]                     | $R_1 = 0.0420, wR_2 = 0.1265$                                 |
| Largest diff. peak/hole / $e \text{ \AA}^{-3}$ | 0.14/-0.12                                                    |
| Flack parameter                                | -0.7(10)                                                      |

## 8. $^1\text{H}$ , $^{13}\text{C}$ , $^{19}\text{F}$ NMR spectra of new substrates and all products

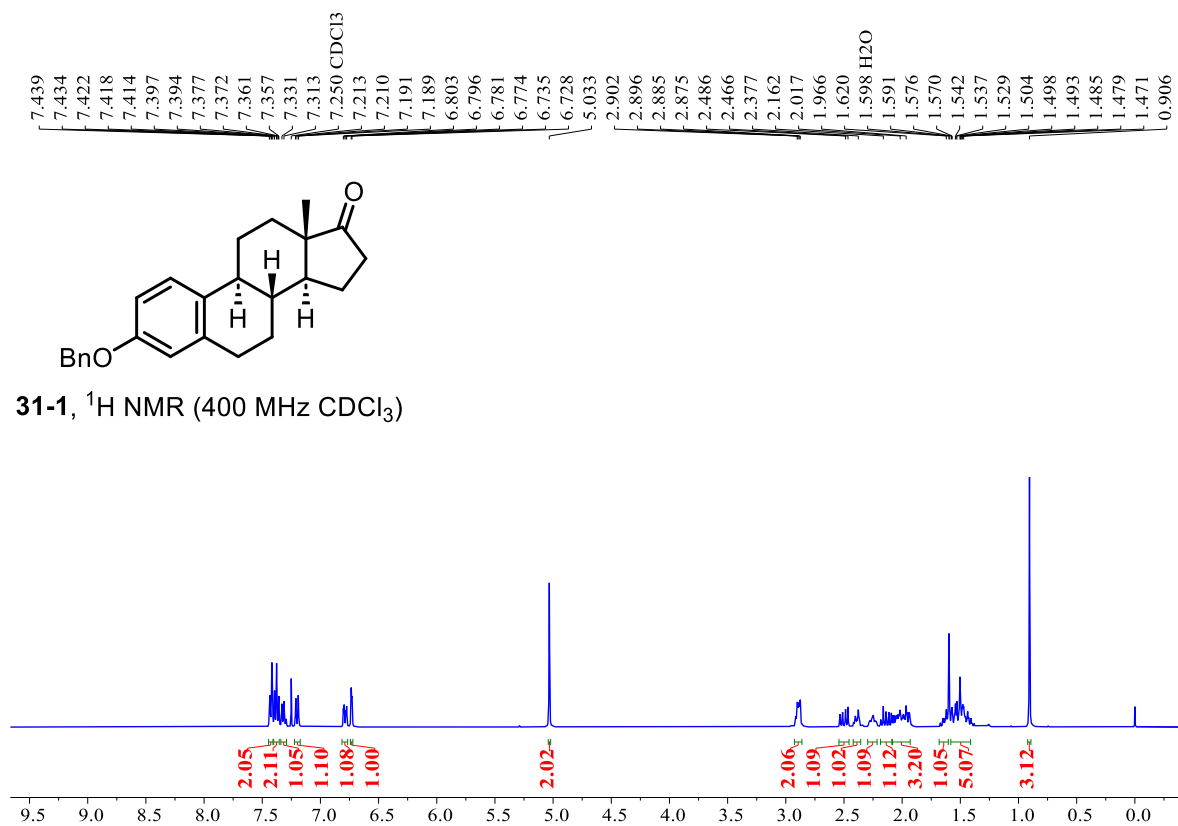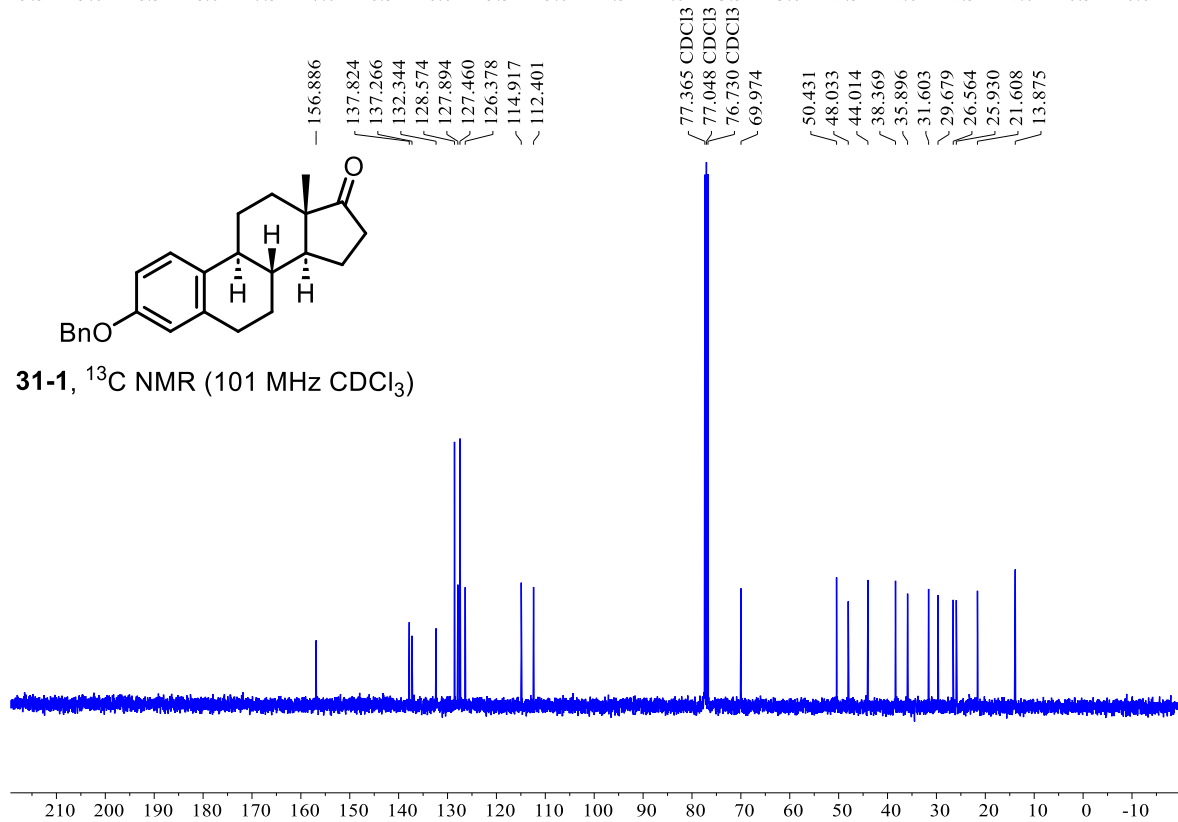

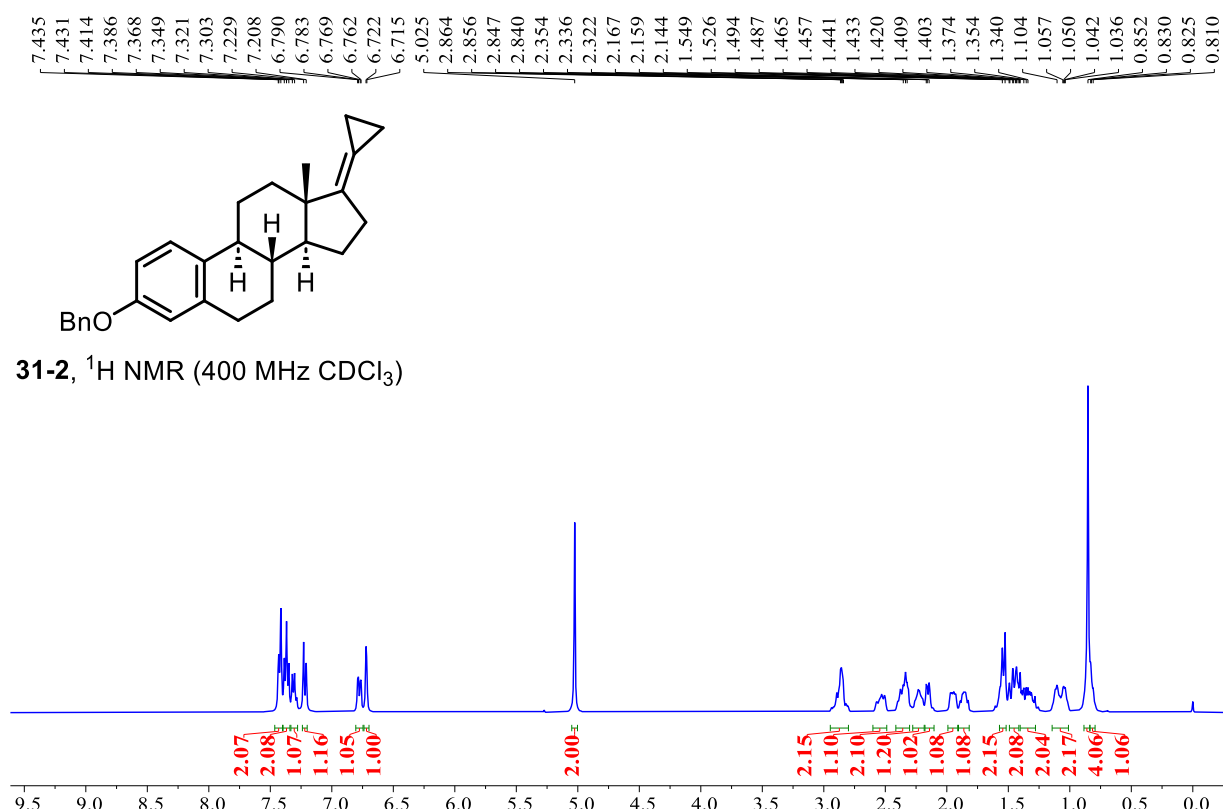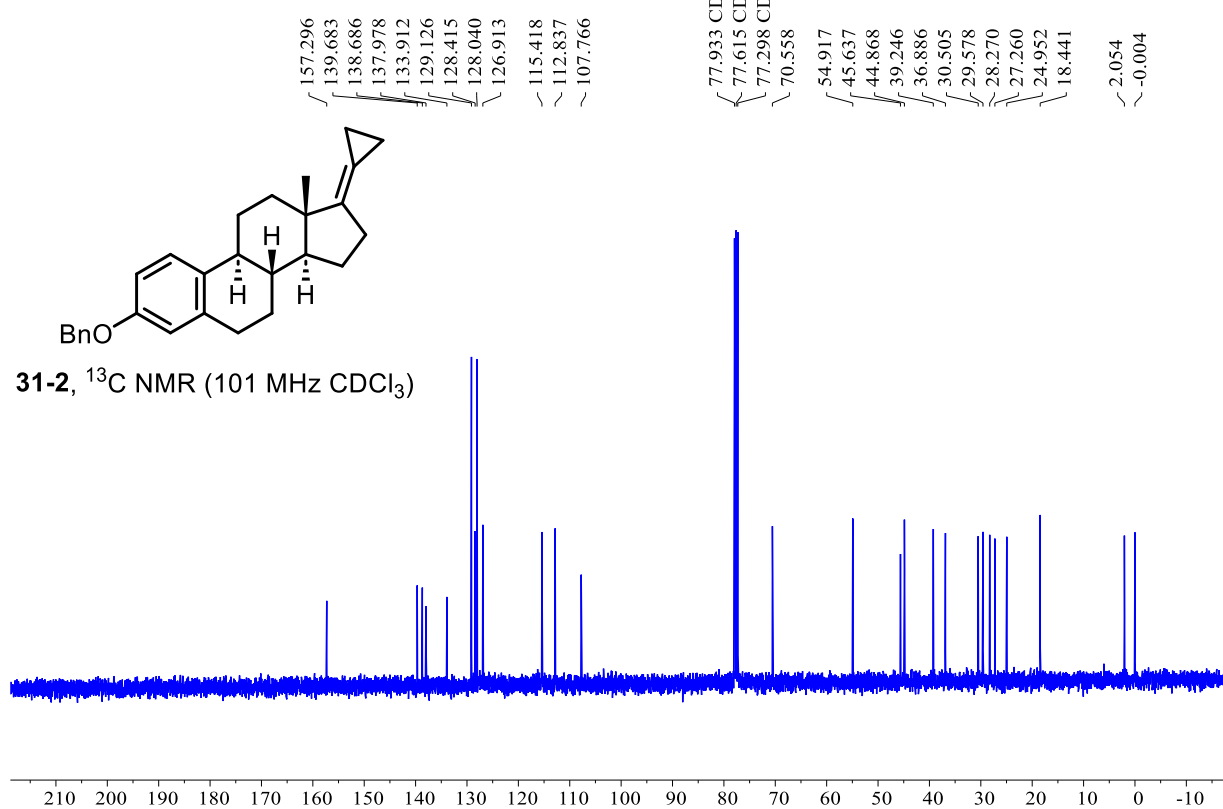

2.197  
2.182  
2.164  
2.151  
2.133  
2.114  
1.959  
1.939  
1.925  
1.906  
1.736  
1.720  
1.570  
1.553  
1.535  
1.524  
1.472  
1.458  
1.453  
1.438  
1.433  
1.426  
1.419  
1.404  
1.389  
1.370  
1.354  
1.344  
1.339  
1.328  
1.315  
1.307  
1.298  
1.276  
1.274  
1.257  
1.240  
1.229  
1.219  
1.116  
1.105  
1.088  
1.043  
1.026  
1.009  
0.971  
0.955  
0.938  
0.826  
0.809

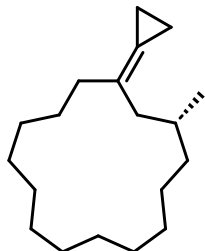

32-1,  $^1\text{H}$  NMR (400 MHz  $\text{CDCl}_3$ )

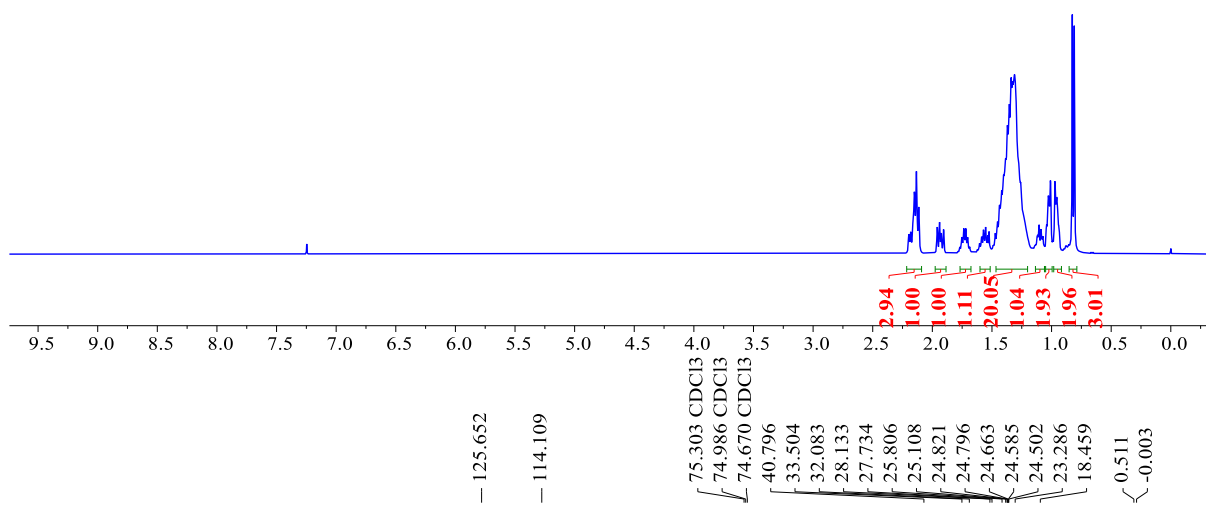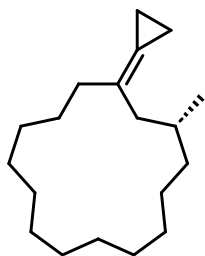

32-1,  $^{13}\text{C}$  NMR (101 MHz  $\text{CDCl}_3$ )

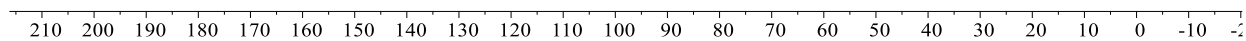

8.080  
8.059  
8.040  
8.019  
7.762  
7.758  
7.742  
7.738  
7.691  
7.688  
7.674  
7.670  
7.666  
7.653  
7.649  
7.488  
7.486  
7.471  
7.468  
7.465  
7.451  
7.448  
7.292  
7.289  
7.285  
7.279  
7.276  
7.271  
7.268  
7.259  
7.252  
7.239  
7.225  
7.204 CDCl<sub>3</sub>  
7.186  
6.152  
4.919  
4.793  
3.414  
3.166  
3.153  
3.149  
3.146  
3.142  
3.126  
2.526  
2.505  
2.485

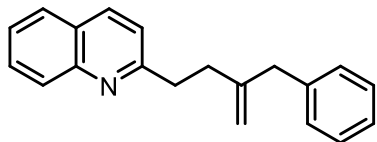

3, <sup>1</sup>H NMR (400 MHz CDCl<sub>3</sub>)

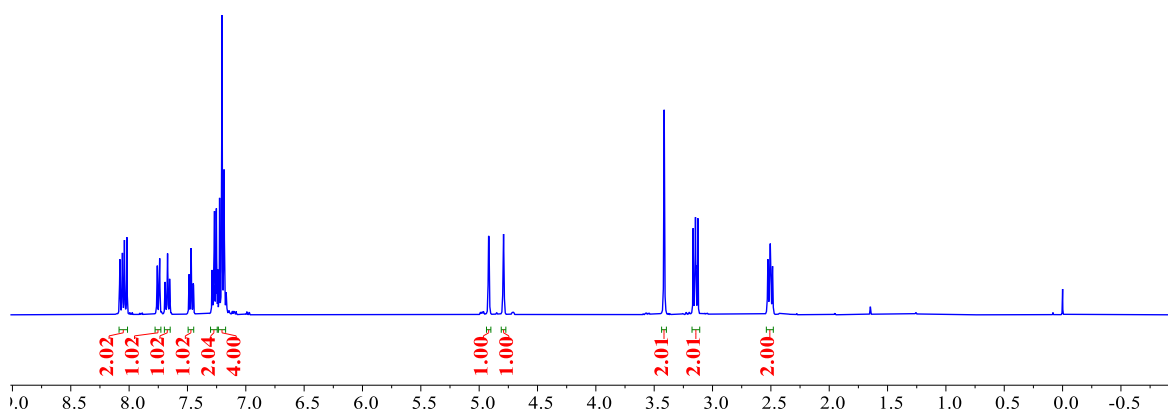

162.126  
147.980  
147.596  
139.585  
136.499  
129.555  
129.085  
128.651  
128.343  
128.299  
128.057  
127.511  
126.770  
126.146  
126.097  
125.874  
121.318  
111.866

77.403 CDCl<sub>3</sub>  
77.085 CDCl<sub>3</sub>  
76.768 CDCl<sub>3</sub>

43.344  
37.212  
35.183

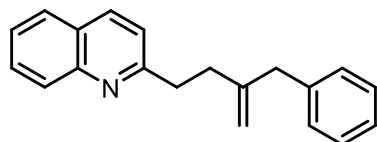

3, <sup>13</sup>C NMR (101 MHz CDCl<sub>3</sub>)

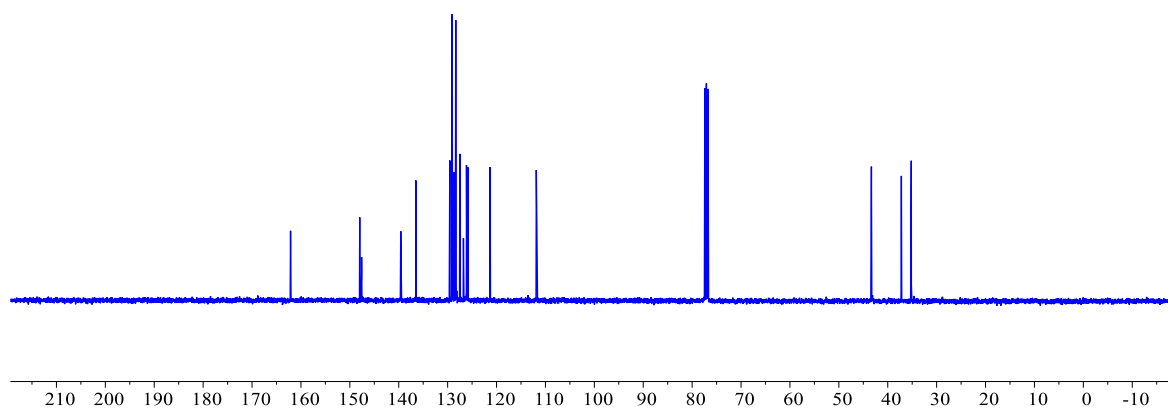

8.055  
8.053  
8.051  
8.044  
8.031  
8.023  
8.014  
7.765  
7.762  
7.745  
7.741  
7.691  
7.688  
7.681  
7.674  
7.670  
7.666  
7.653  
7.649  
7.645  
7.487  
7.484  
7.470  
7.467  
7.464  
7.449  
7.446  
7.432  
7.266  
7.245  
7.233 CDCl<sub>3</sub>  
7.124  
4.904  
4.900  
4.897  
4.893  
4.533  
4.528  
3.551  
3.189  
3.176  
3.172  
3.169  
3.164  
3.160  
3.148  
2.594  
2.574  
2.553  
2.244

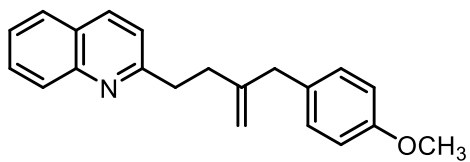

4, <sup>1</sup>H NMR (400 MHz CDCl<sub>3</sub>)

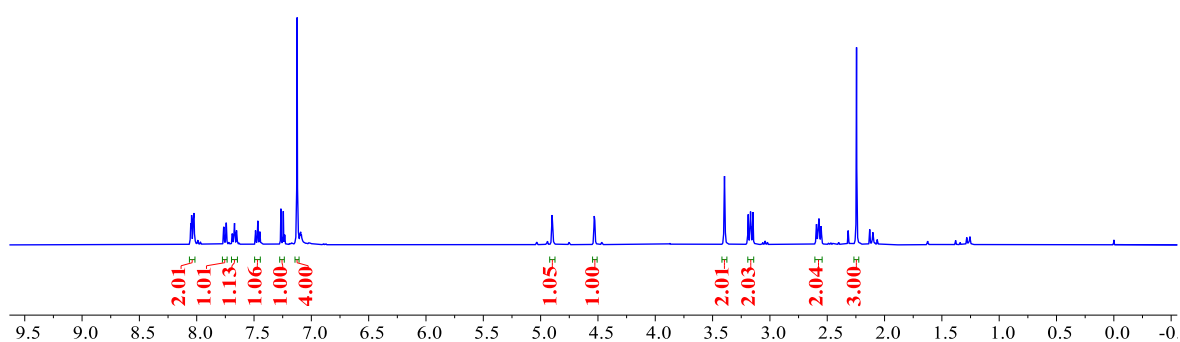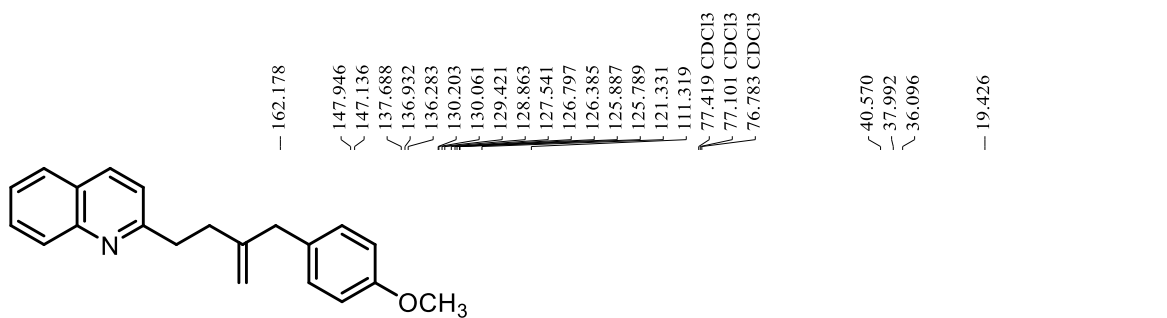

4, <sup>13</sup>C NMR (101 MHz CDCl<sub>3</sub>)

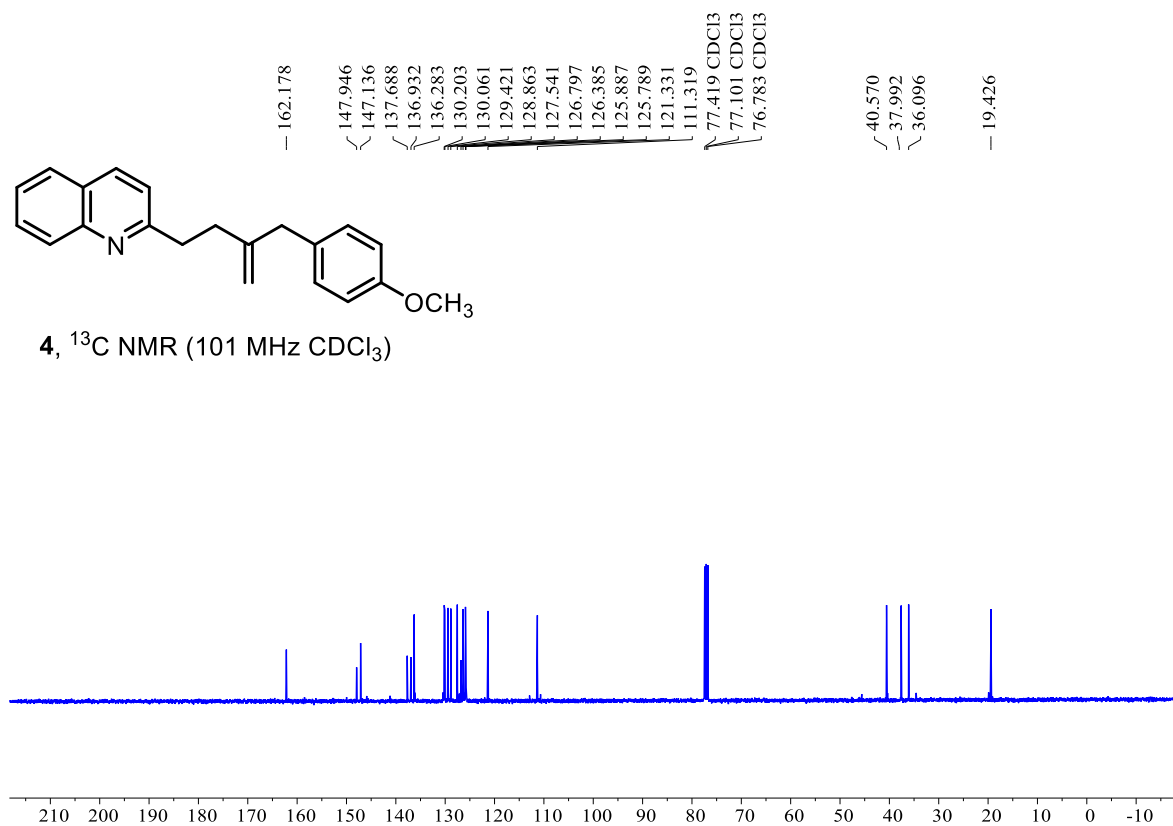

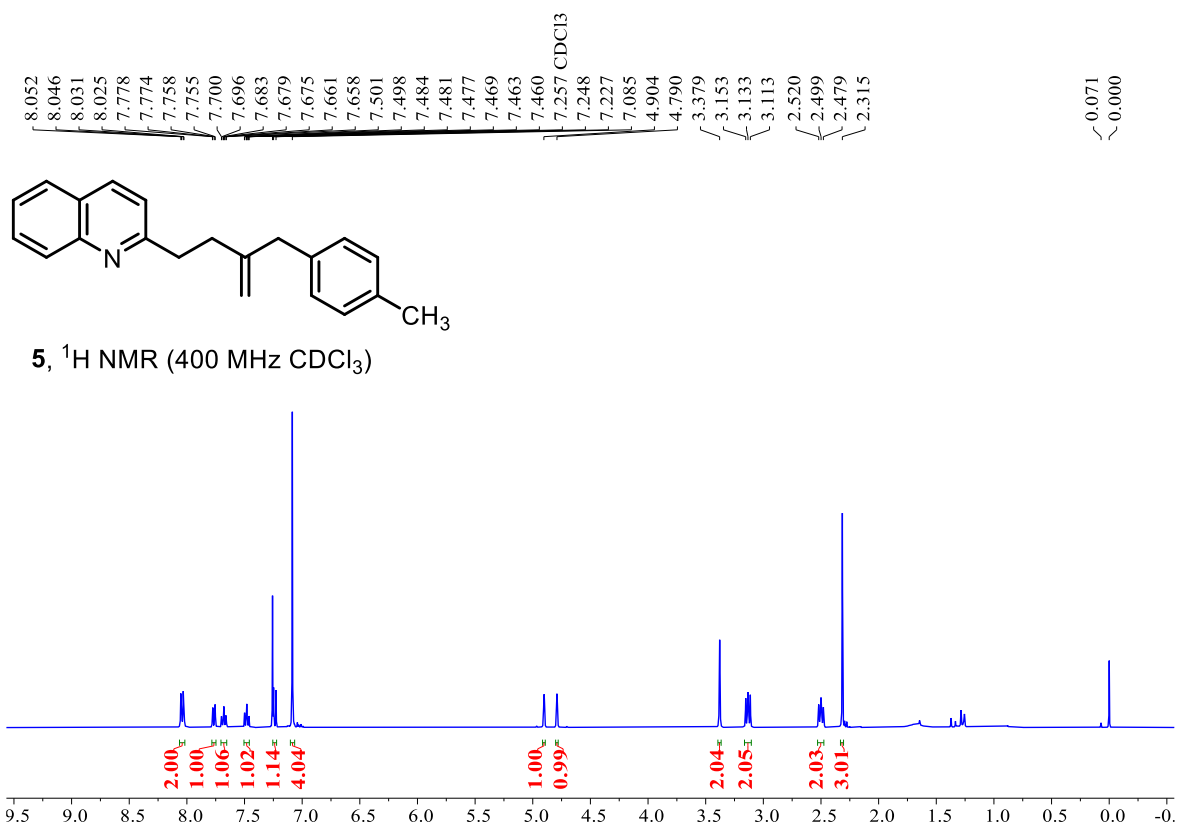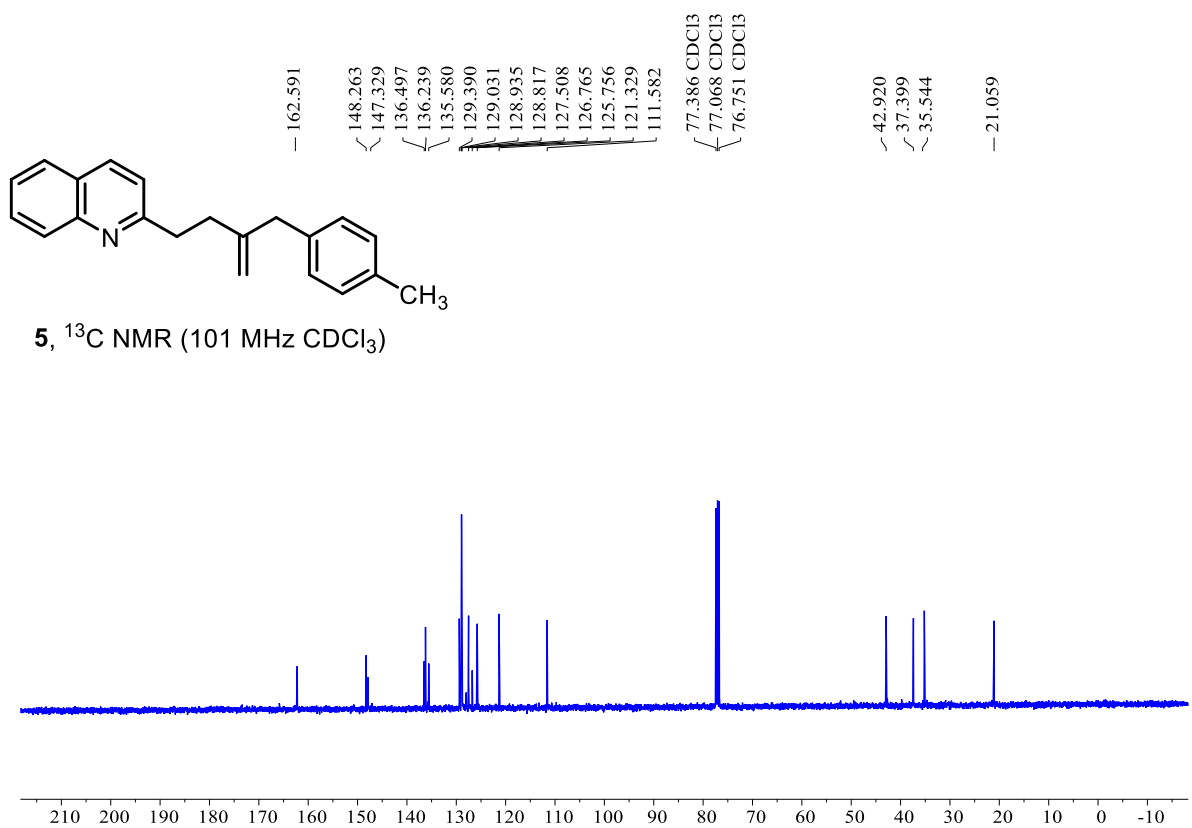

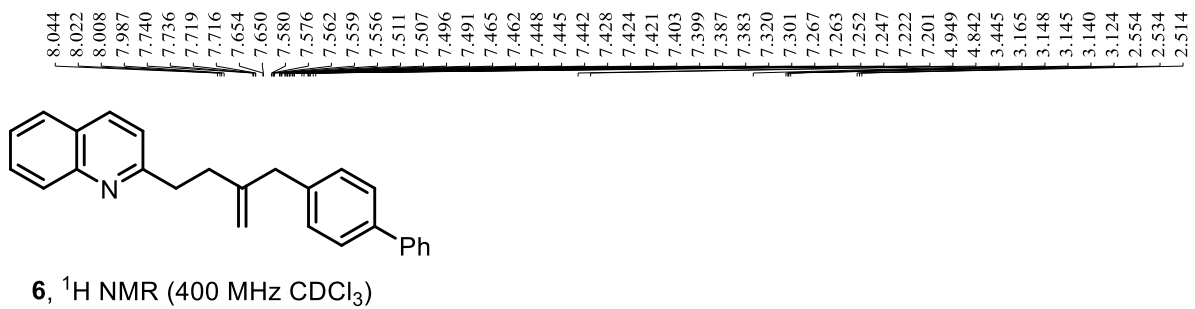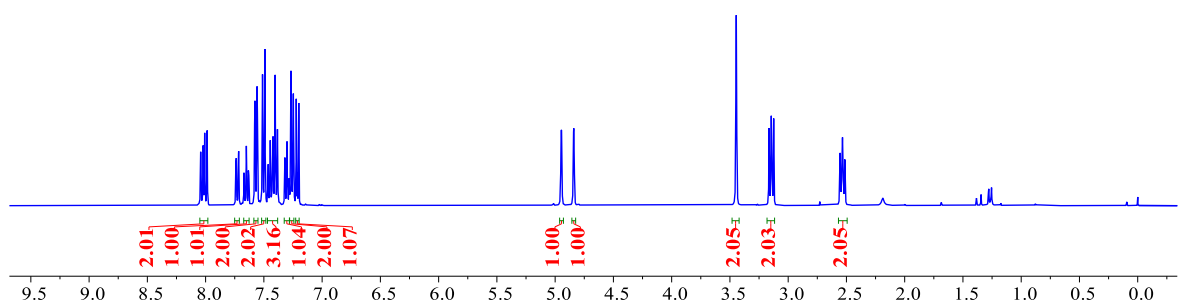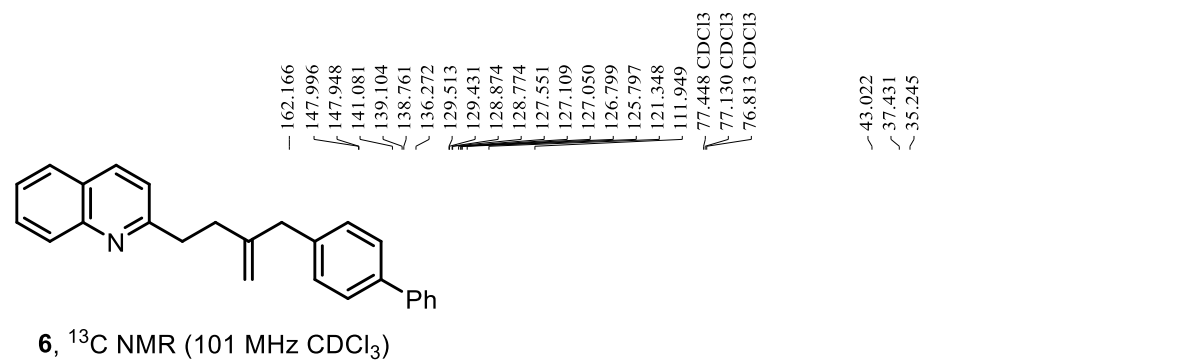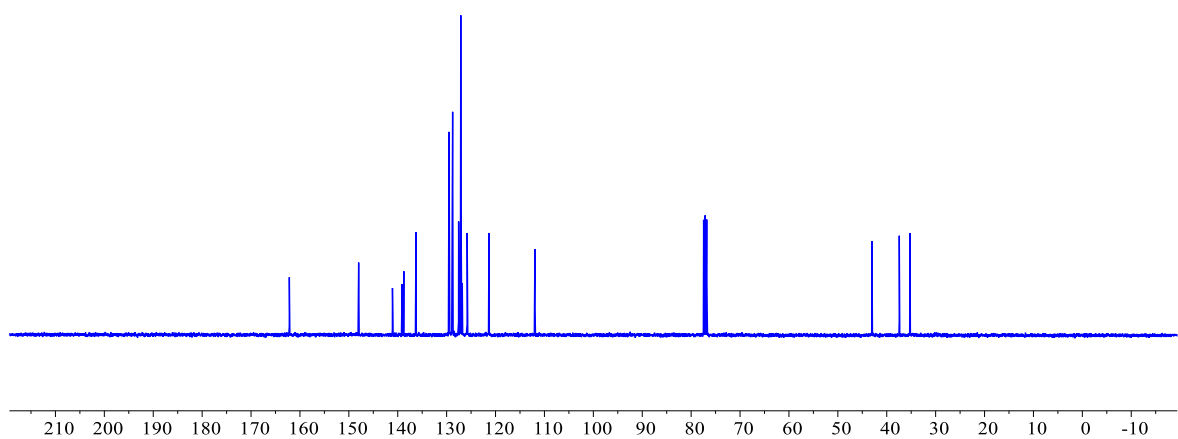

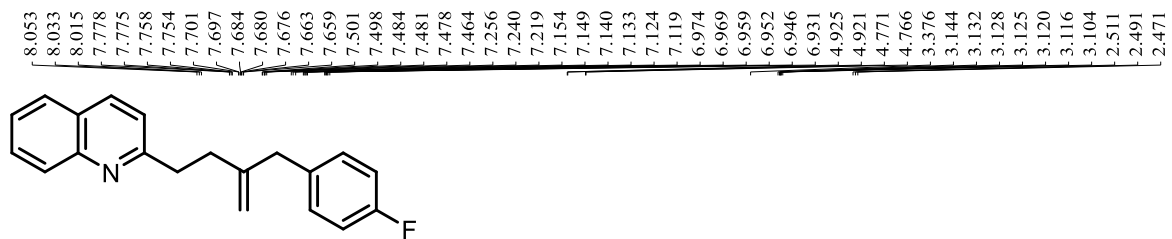

7,  $^1\text{H}$  NMR (400 MHz  $\text{CDCl}_3$ )

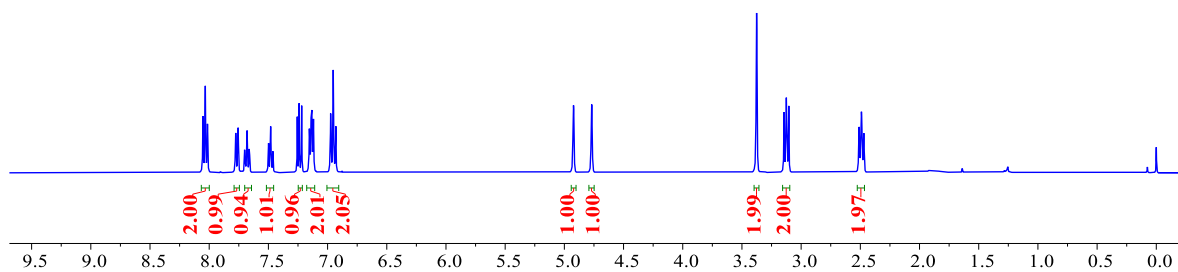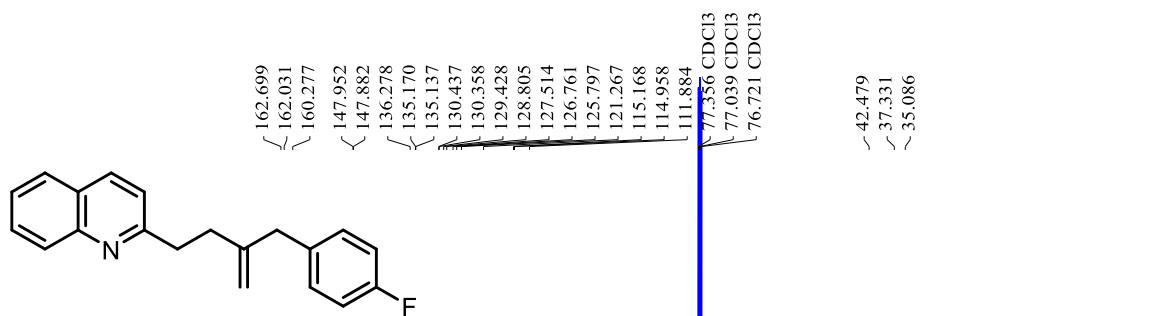

7,  $^{13}\text{C}$  NMR (101 MHz  $\text{CDCl}_3$ )

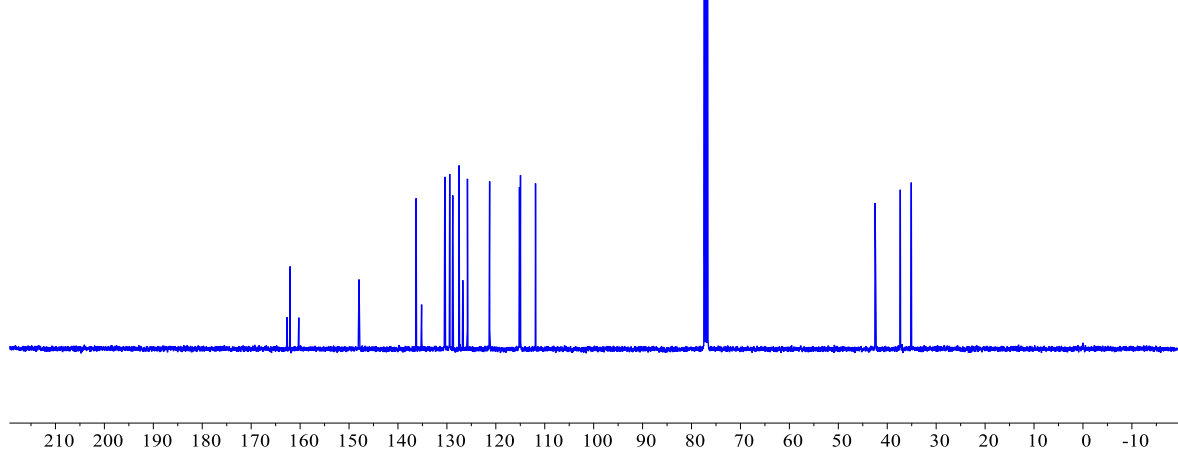

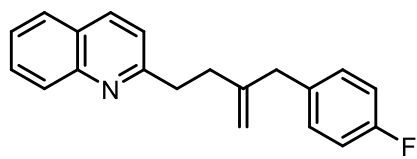

7,  $^{19}\text{F}$  NMR (376 MHz  $\text{CDCl}_3$ )

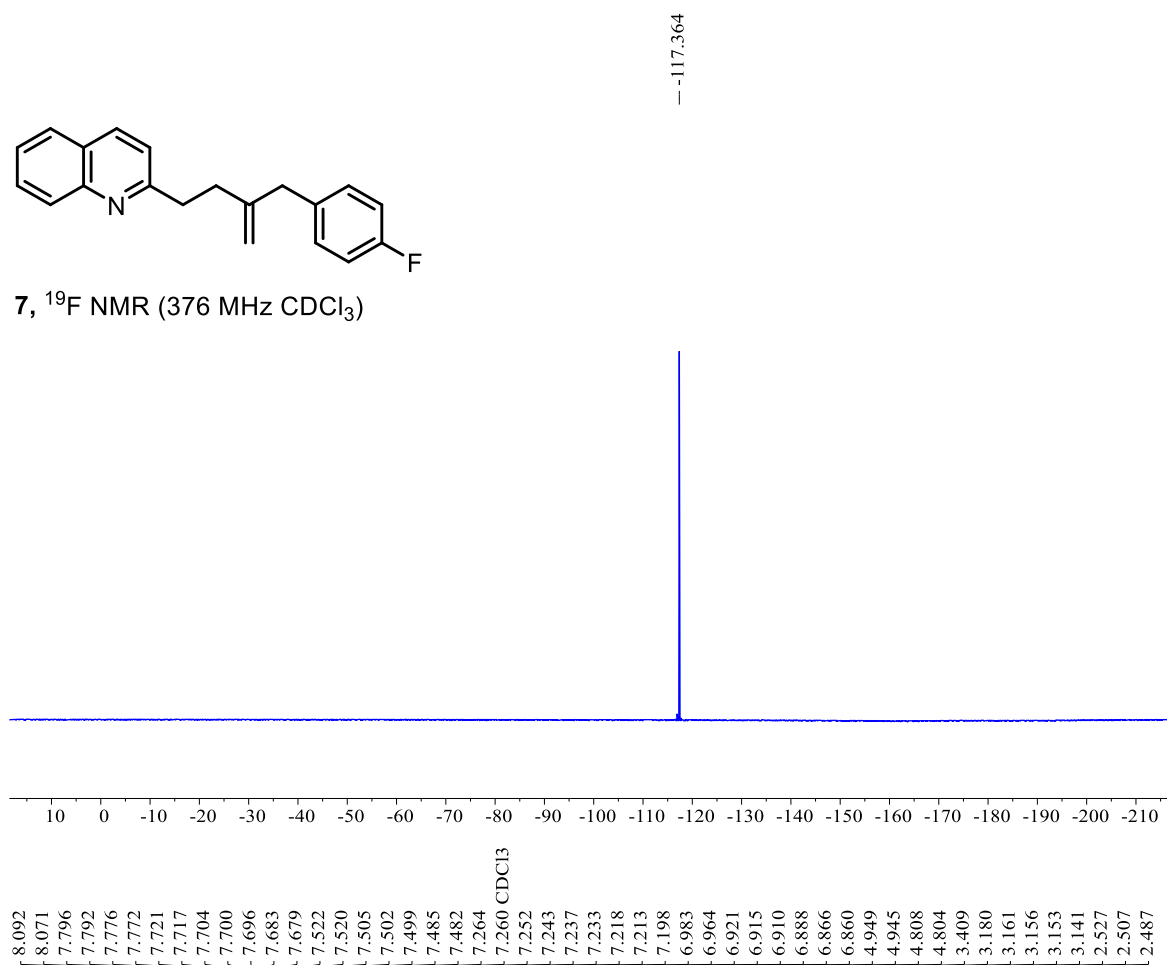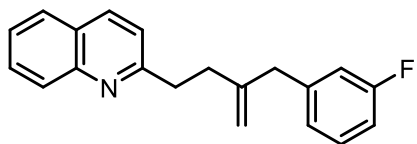

8,  $^1\text{H}$  NMR (400 MHz  $\text{CDCl}_3$ )

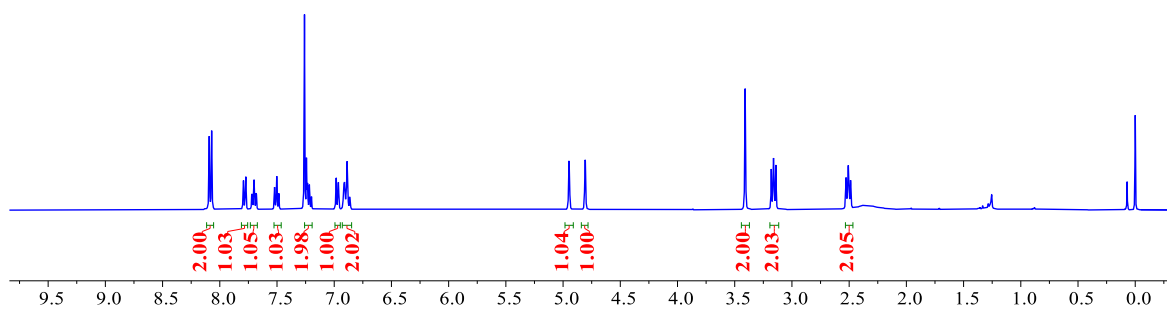

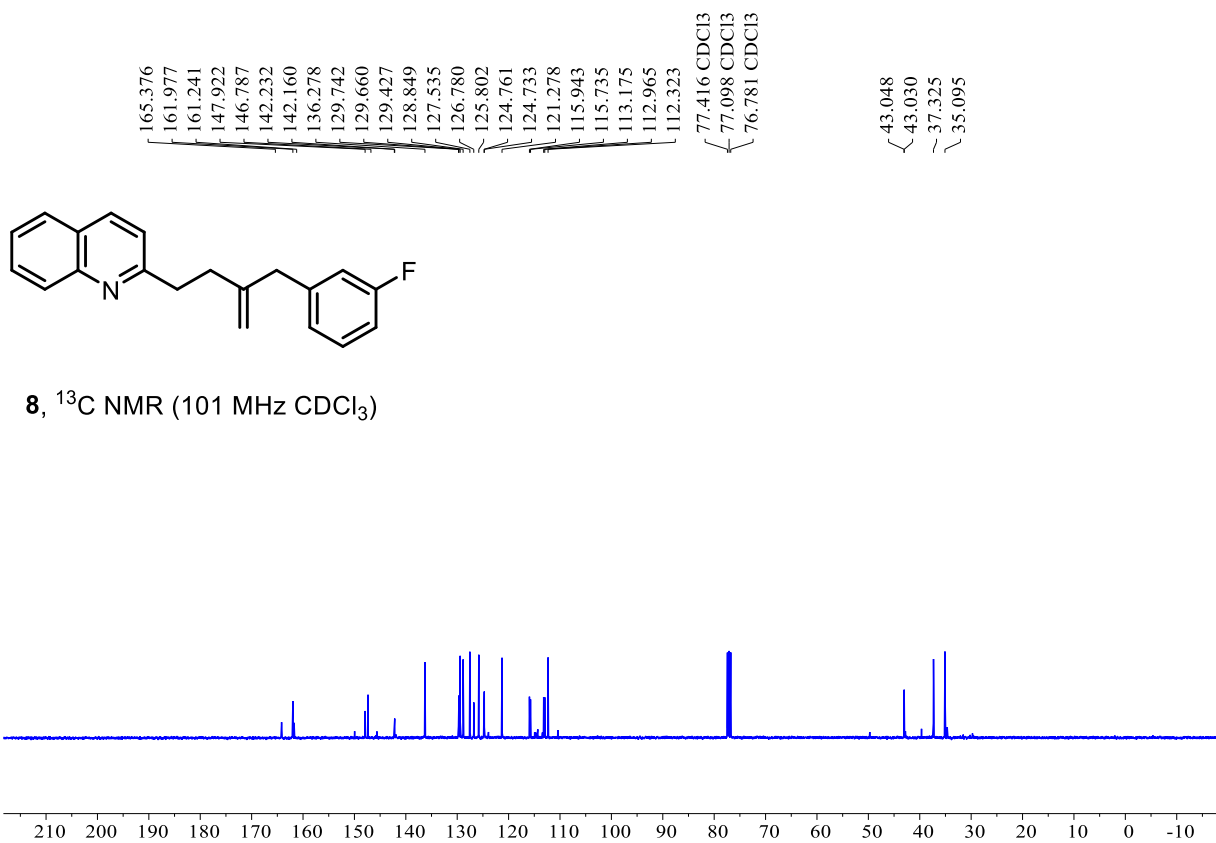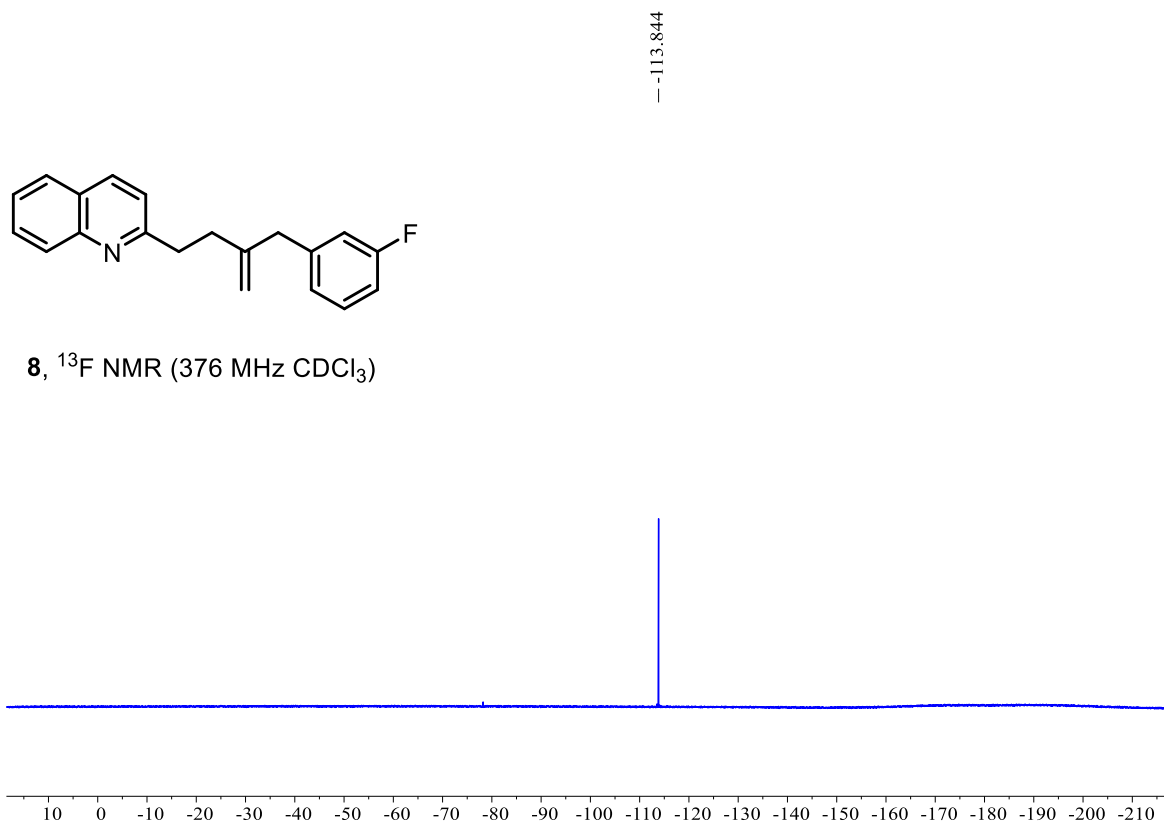

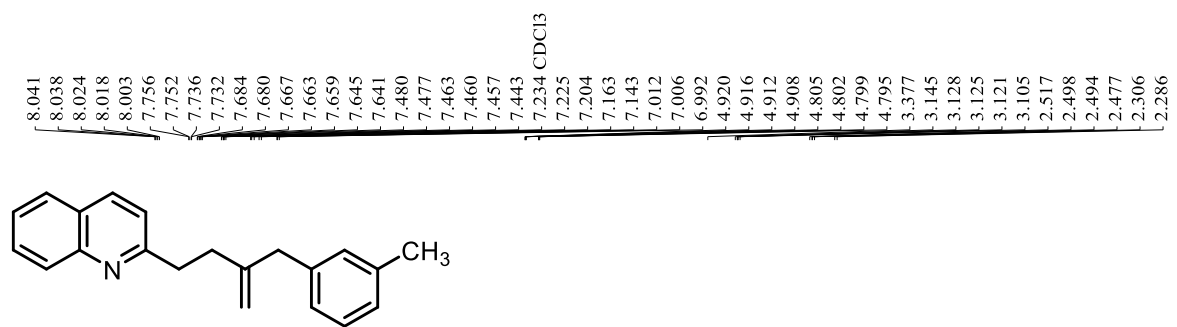

**9**, <sup>1</sup>H NMR (400 MHz CDCl<sub>3</sub>)

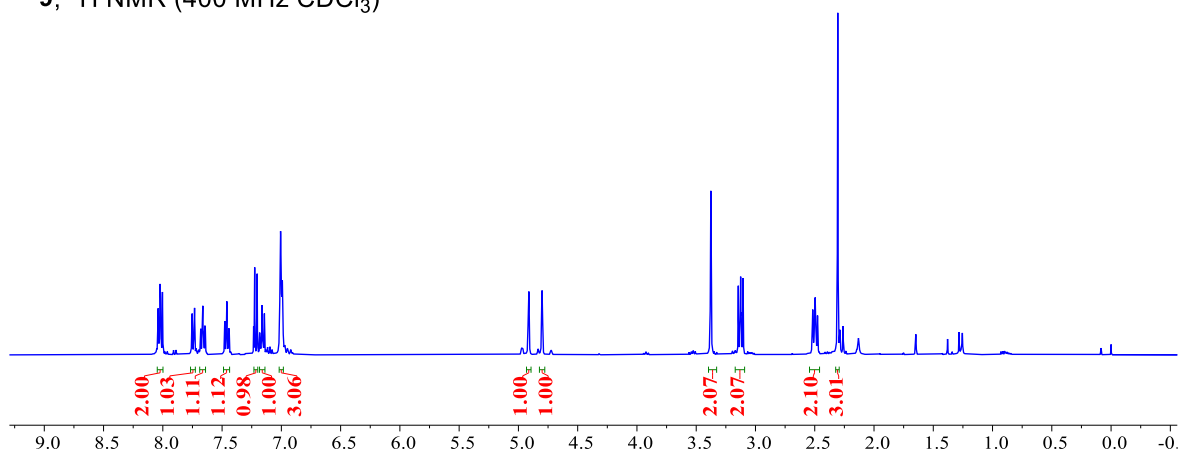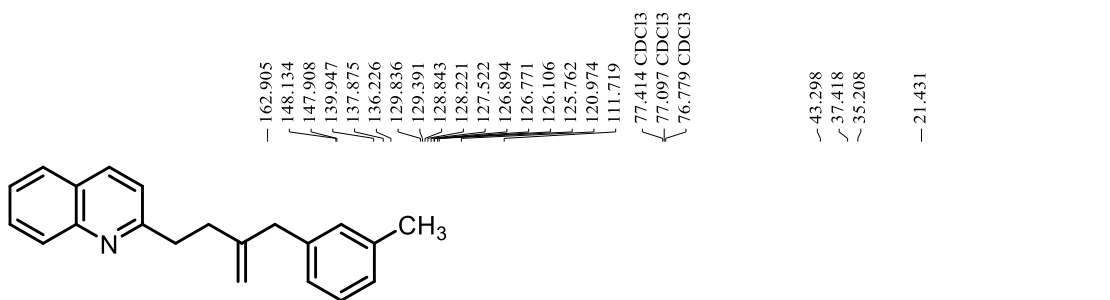

**9**, <sup>13</sup>C NMR (101 MHz CDCl<sub>3</sub>)

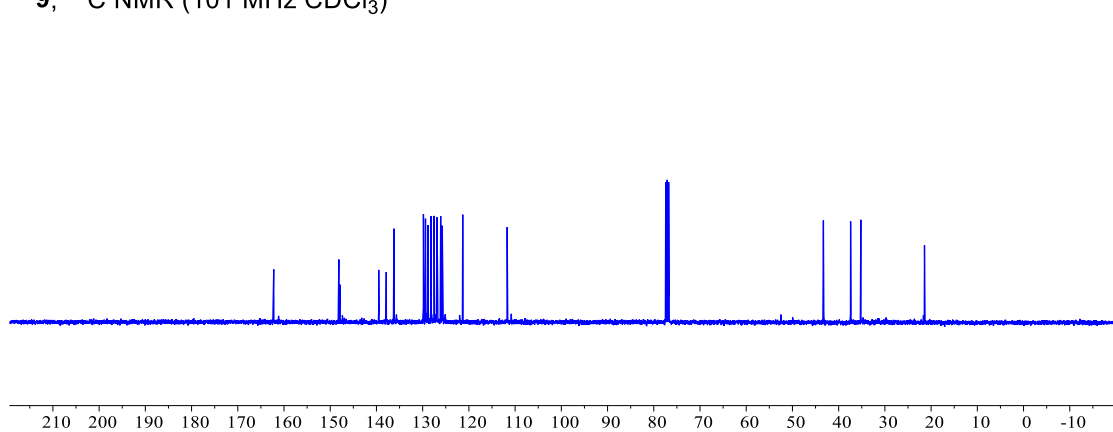

8.053  
8.045  
8.031  
8.024  
7.766  
7.763  
7.746  
7.742  
7.692  
7.689  
7.675  
7.671  
7.667  
7.654  
7.650  
7.646  
7.488  
7.485  
7.471  
7.468  
7.465  
7.451  
7.447  
7.267  
7.259  
7.246  
7.233 CDCl<sub>3</sub>  
7.124  
4.907  
4.904  
4.901  
4.897  
4.894  
4.531  
4.526  
3.399  
3.396  
3.393  
3.190  
3.177  
3.173  
3.170  
3.165  
3.161  
3.149  
2.621  
2.594  
2.574  
2.554  
2.245

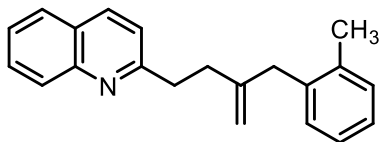

10, <sup>1</sup>H NMR (400 MHz CDCl<sub>3</sub>)

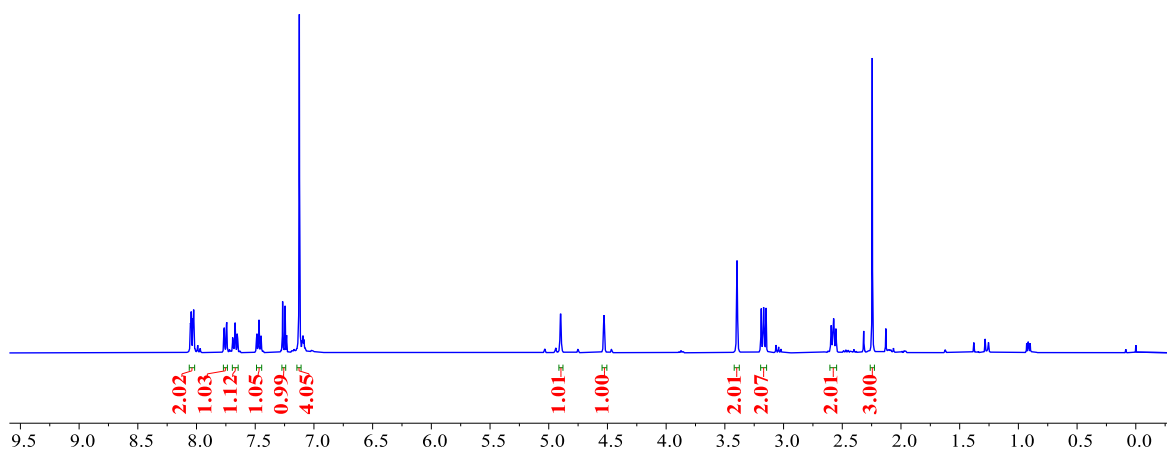

162.176  
147.951  
147.135  
137.685  
136.930  
136.272  
130.197  
130.058  
129.414  
128.870  
127.539  
126.791  
126.380  
125.883  
125.782  
121.327  
111.305  
77.413 CDCl<sub>3</sub>  
77.095 CDCl<sub>3</sub>  
76.777 CDCl<sub>3</sub>  
40.568  
38.054  
36.095  
19.425

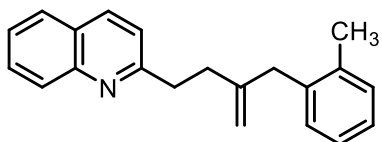

10, <sup>13</sup>C NMR (101 MHz CDCl<sub>3</sub>)

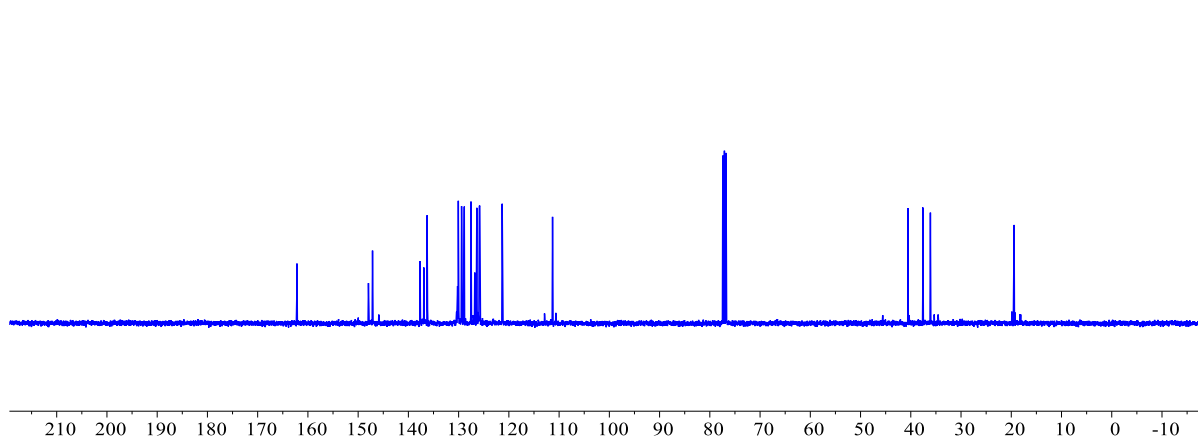

8.000  
7.995  
7.979  
7.974  
7.974  
7.712  
7.709  
7.692  
7.688  
7.633  
7.629  
7.616  
7.612  
7.607  
7.594  
7.591  
7.432  
7.413  
7.394  
7.210 CDCl<sub>3</sub>  
7.189  
7.184  
7.144  
7.139  
7.124  
7.120  
7.104  
7.100  
7.094  
7.086  
7.082  
7.001  
6.982  
6.963  
6.945  
6.940  
6.919  
6.915  
4.842  
4.657  
3.376  
3.121  
3.102  
3.096  
3.092  
3.081  
2.501  
2.481  
2.461

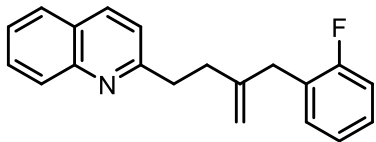

11, <sup>1</sup>H NMR (400 MHz CDCl<sub>3</sub>)

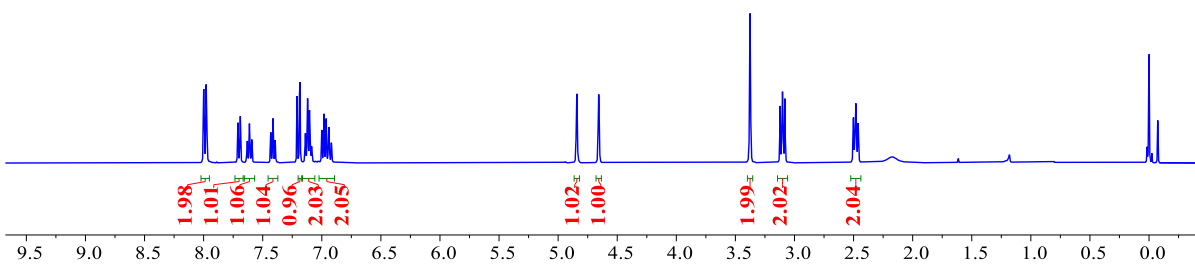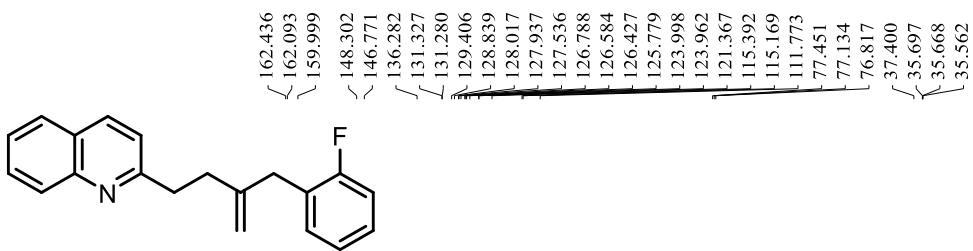

11, <sup>13</sup>C NMR (101 MHz CDCl<sub>3</sub>)

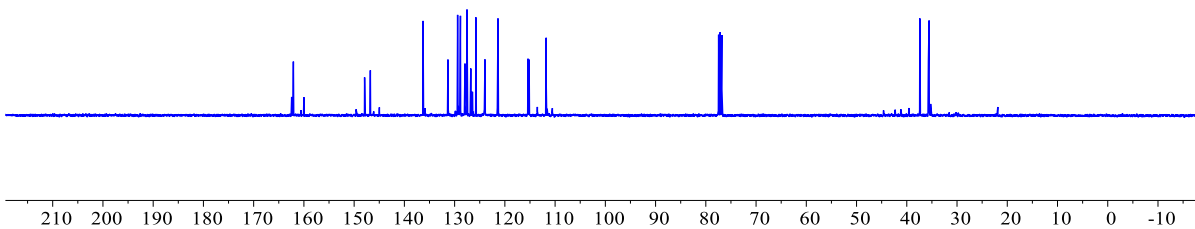

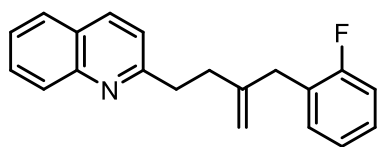

11,  $^{19}\text{F}$  NMR (376 MHz  $\text{CDCl}_3$ )

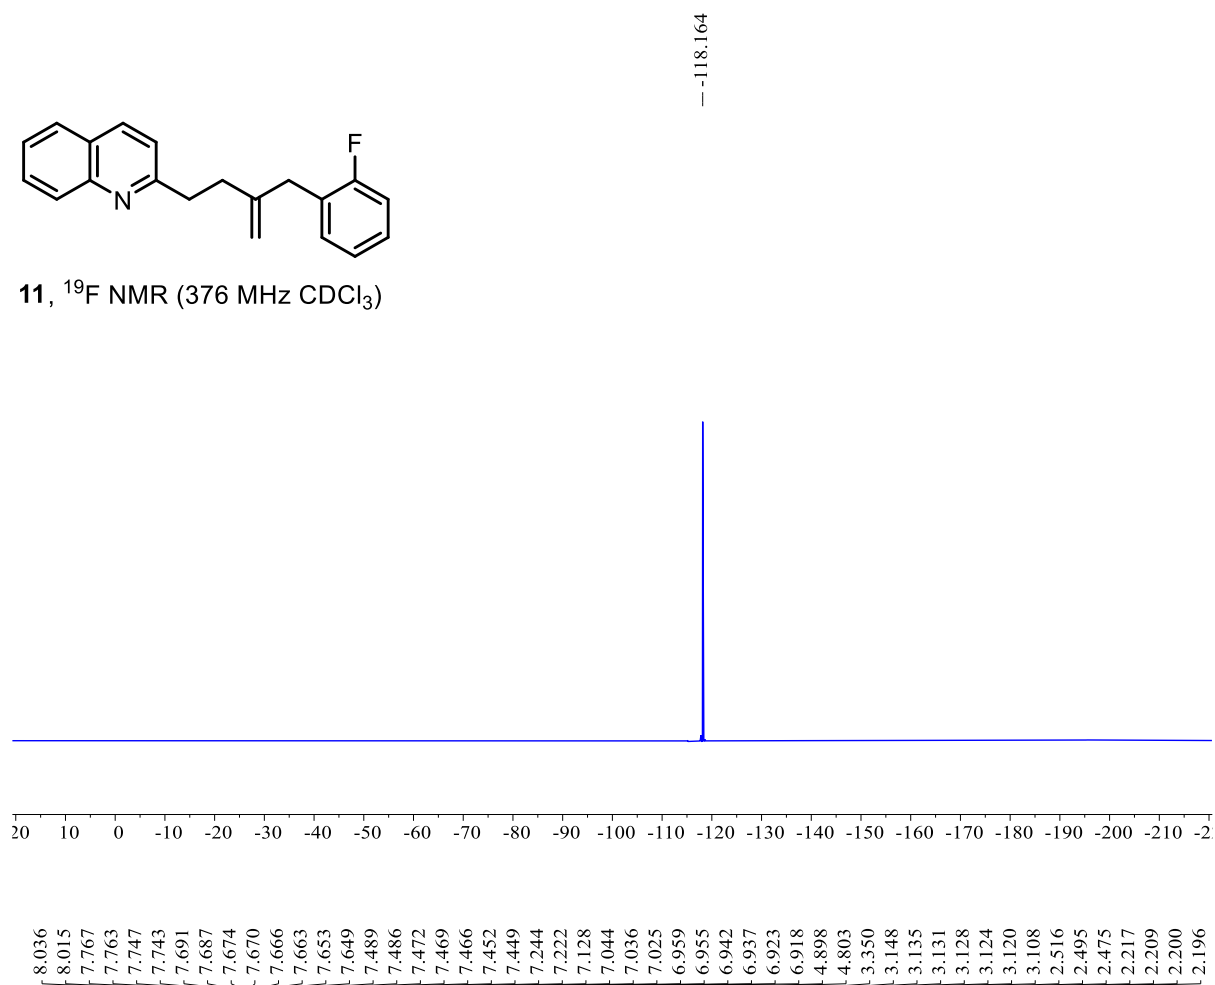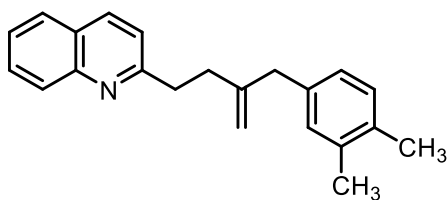

12,  $^1\text{H}$  NMR (400 MHz  $\text{CDCl}_3$ )

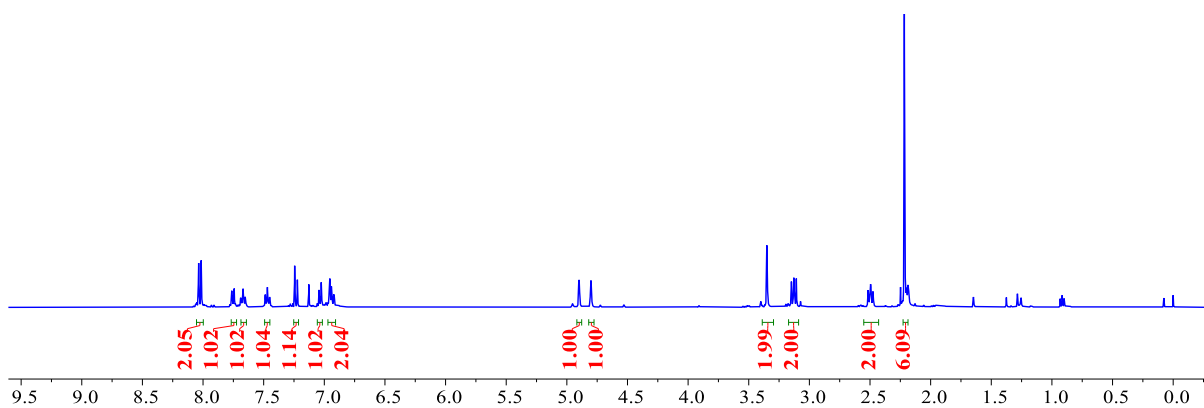

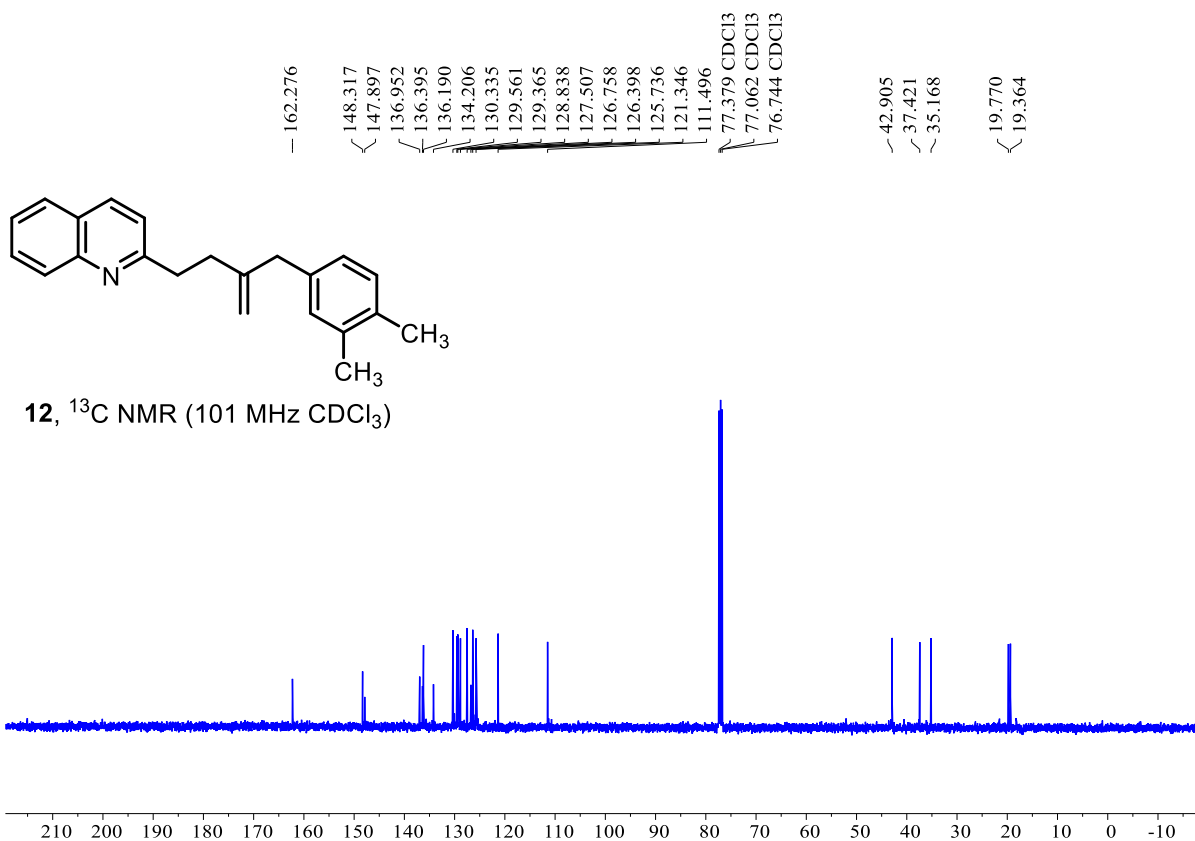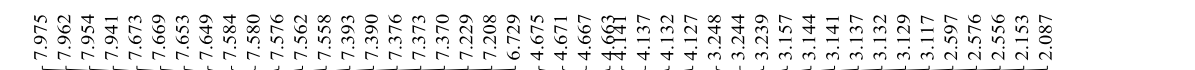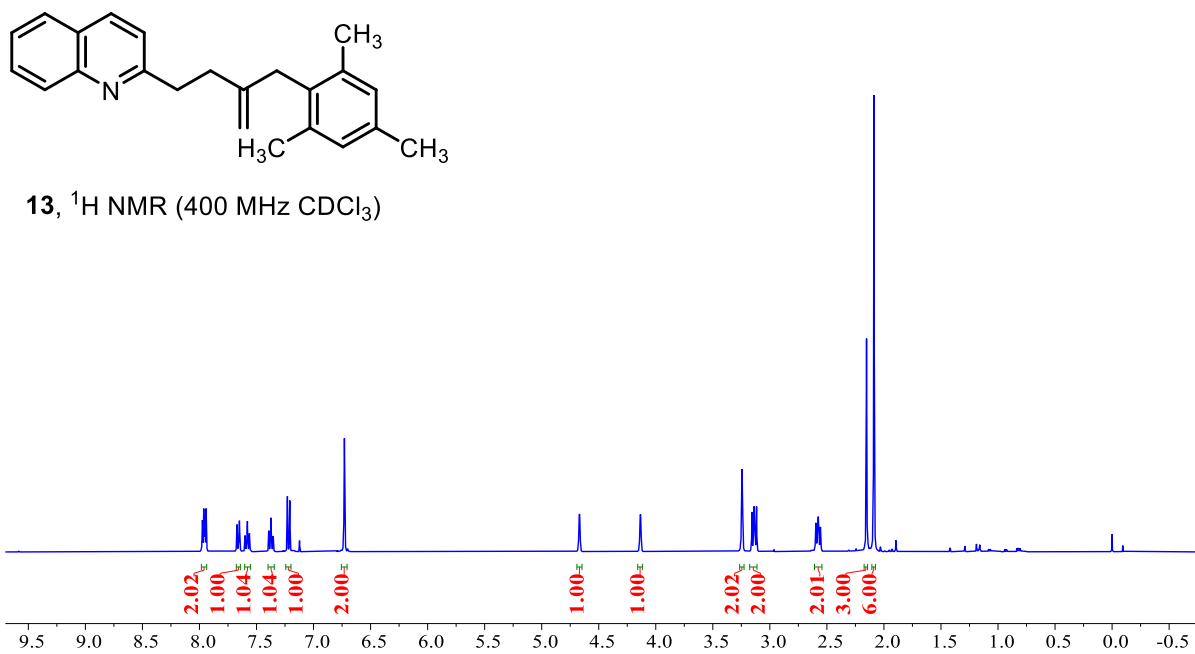

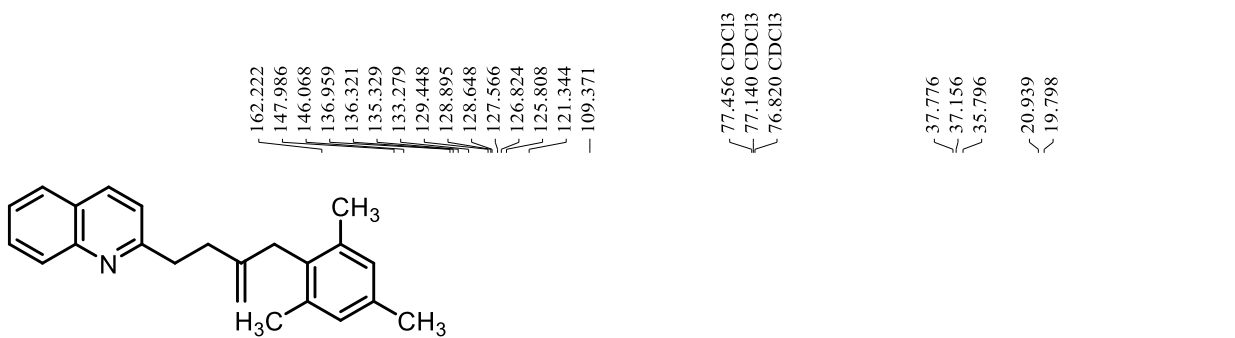

13, <sup>13</sup>C NMR (101 MHz CDCl<sub>3</sub>)

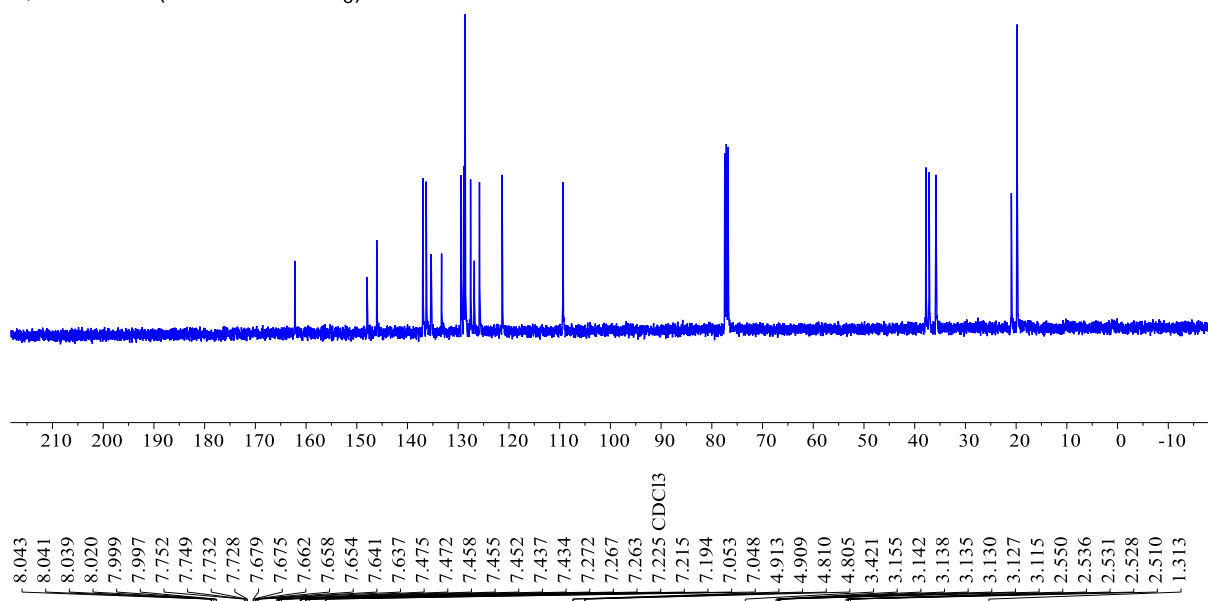

14, <sup>1</sup>H NMR (400 MHz CDCl<sub>3</sub>)

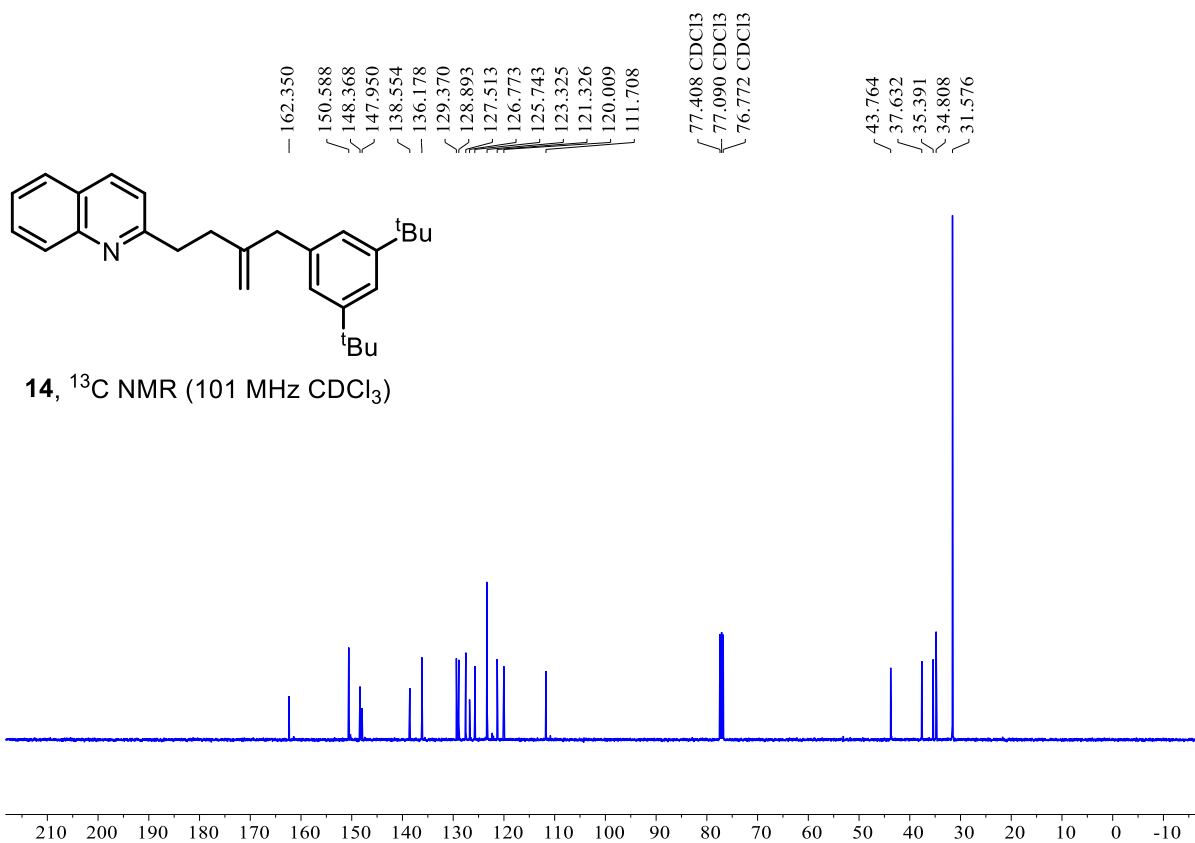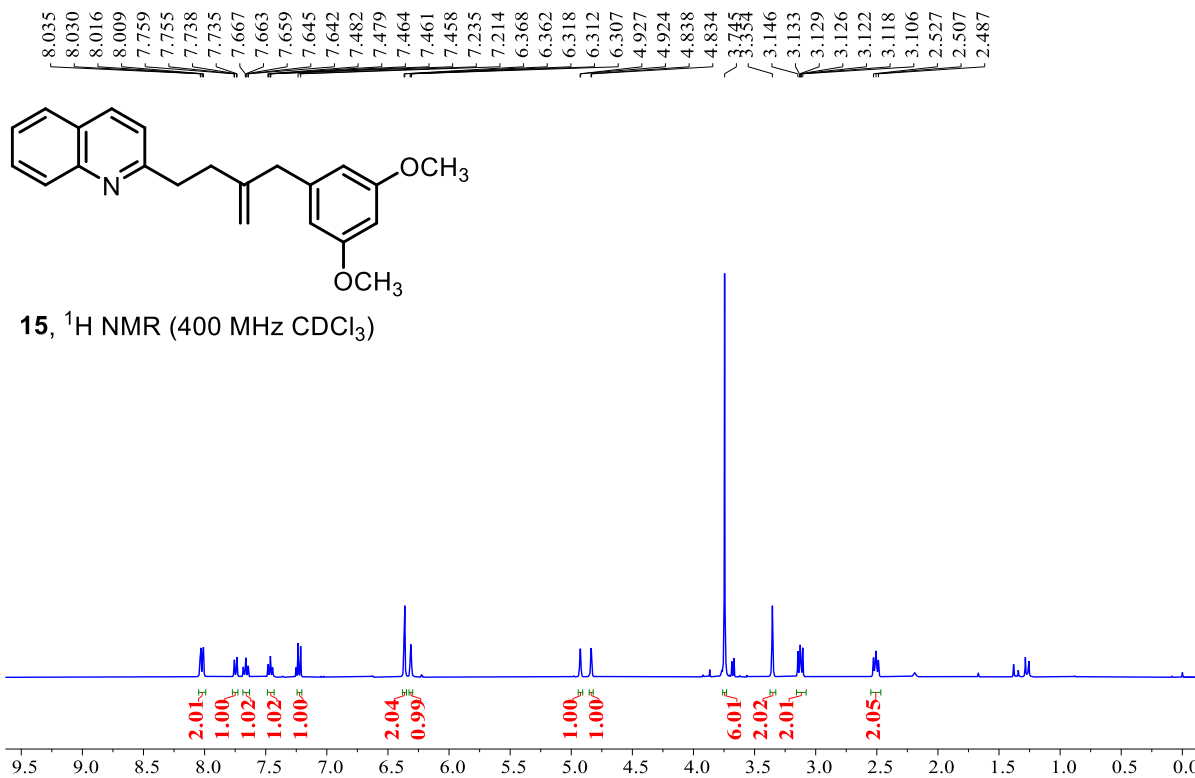

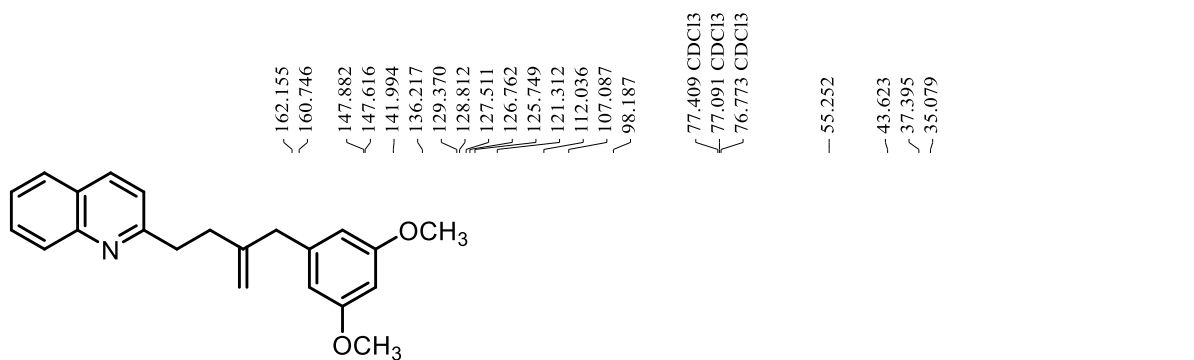

15, <sup>13</sup>C NMR (101 MHz CDCl<sub>3</sub>)

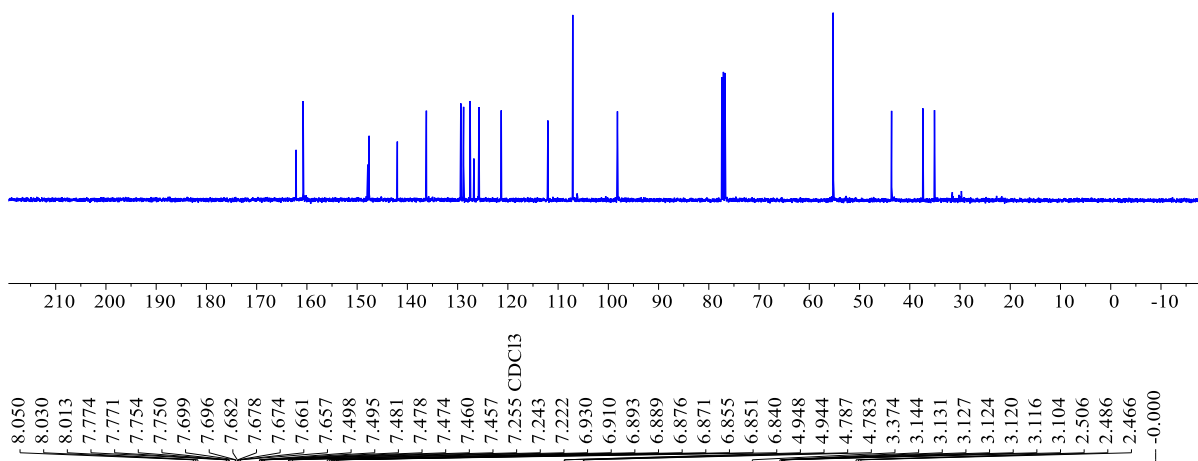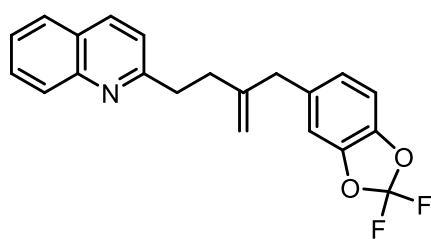

16, <sup>1</sup>H NMR (400 MHz CDCl<sub>3</sub>)

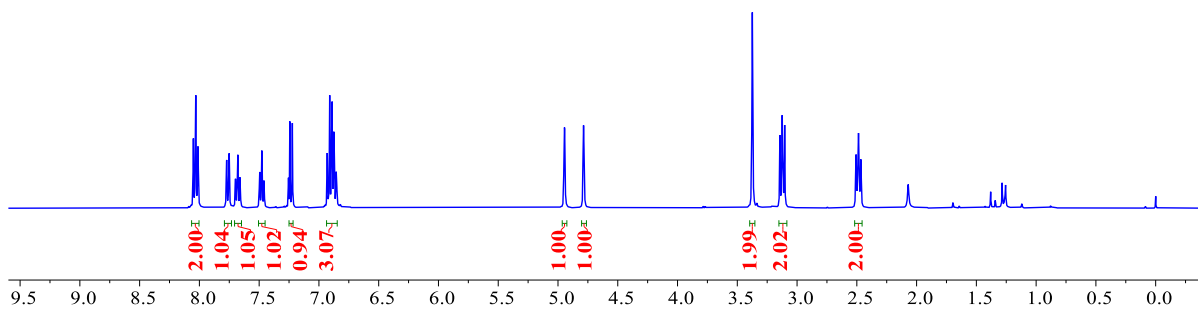

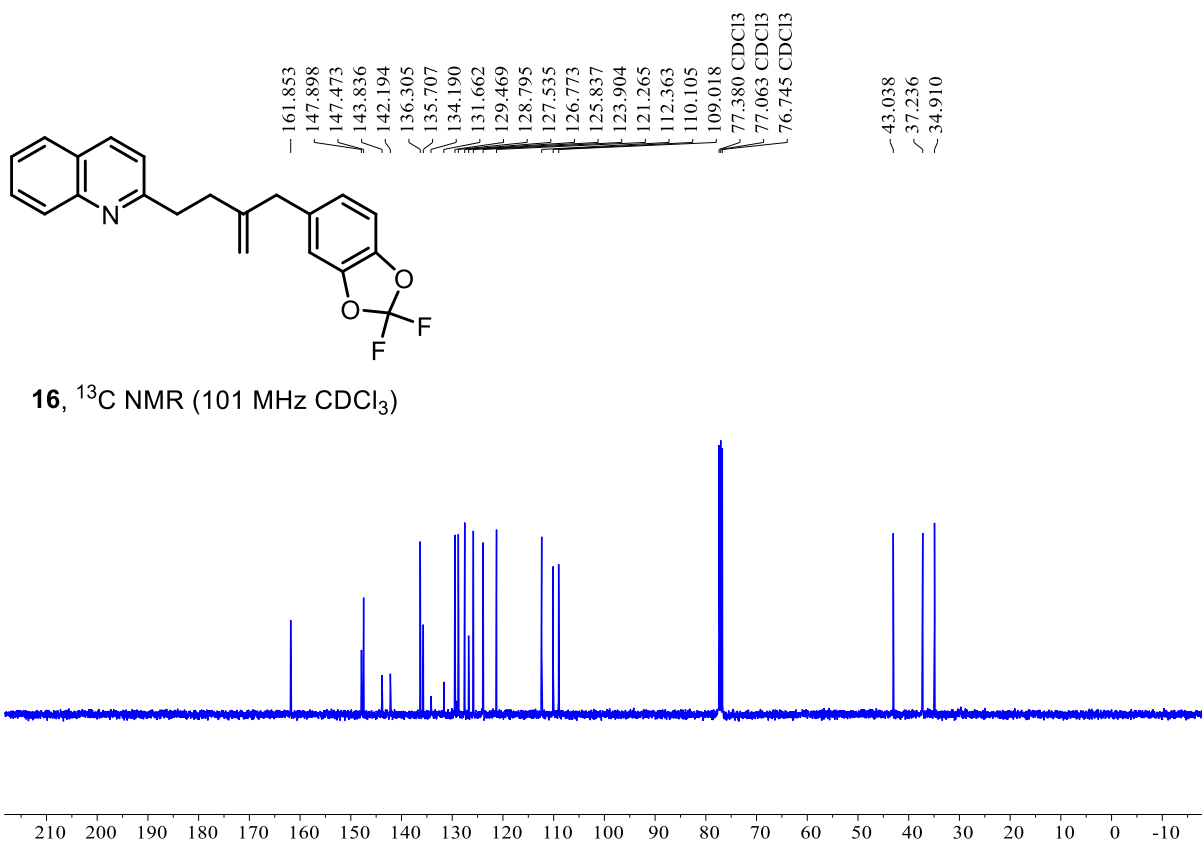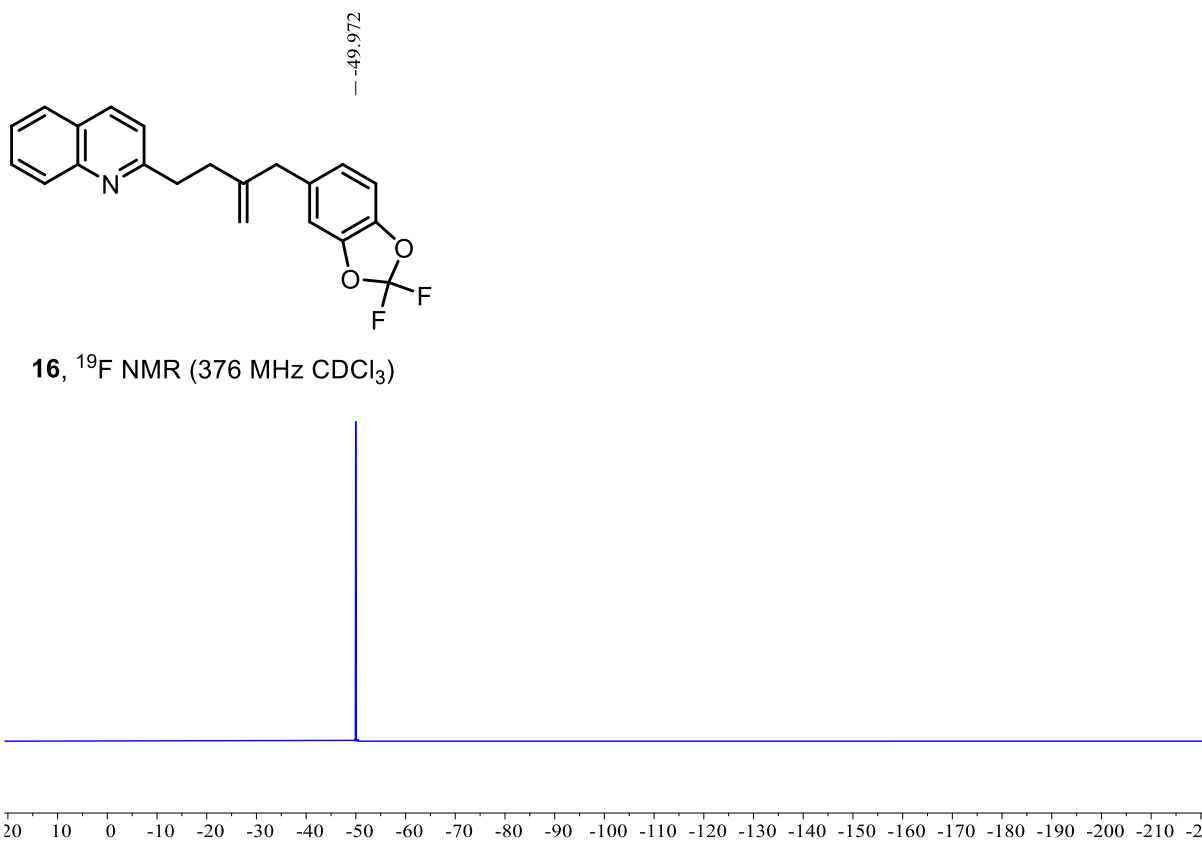

8.065  
8.044  
7.990  
7.969  
7.958  
7.940  
7.935  
7.819  
7.814  
7.799  
7.795  
7.733  
7.730  
7.718  
7.713  
7.709  
7.697  
7.680  
7.663  
7.659  
7.466  
7.463  
7.449  
7.446  
7.442  
7.429  
7.425  
7.419  
7.414  
7.407  
7.400  
7.394  
7.389  
7.382  
7.362  
7.340  
7.337  
7.323  
7.206  
7.185  
4.933  
4.599  
3.853  
3.216  
3.192  
3.176  
2.642  
2.622  
2.602

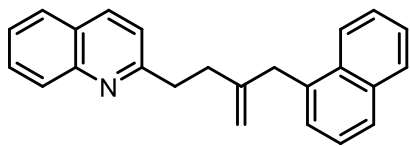

17, <sup>1</sup>H NMR (400 MHz CDCl<sub>3</sub>)

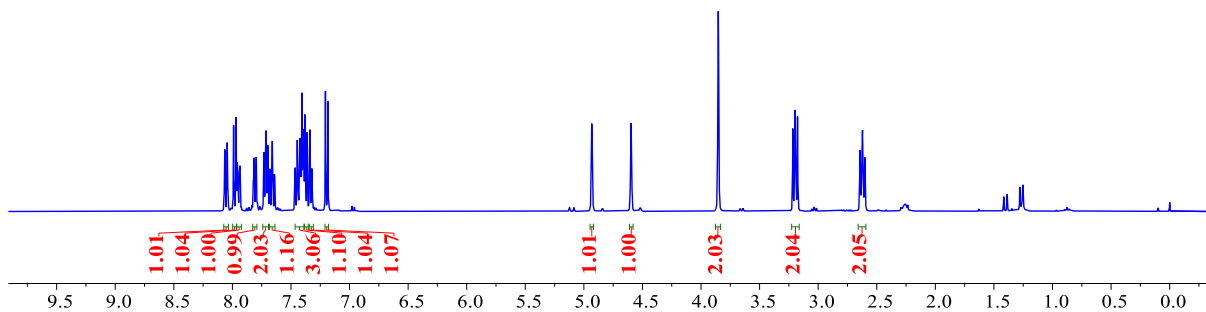

162.137  
147.957  
147.539  
136.304  
135.601  
133.897  
132.492  
129.458  
128.895  
128.630  
127.579  
127.478  
127.115  
126.823  
125.825  
125.789  
125.549  
125.532  
124.520  
121.360  
112.178  
77.467 CDCl<sub>3</sub>  
77.149 CDCl<sub>3</sub>  
76.832 CDCl<sub>3</sub>  
40.338  
37.581  
36.117

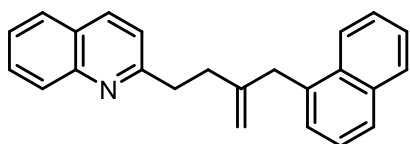

17, <sup>13</sup>C NMR (101 MHz CDCl<sub>3</sub>)

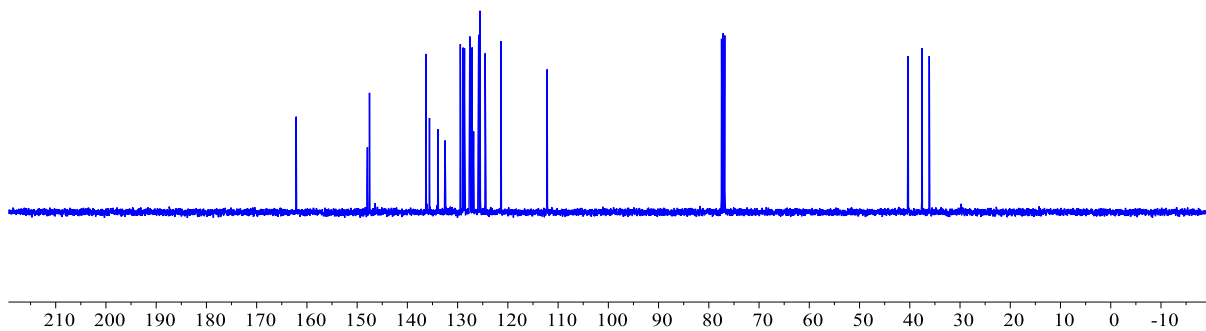

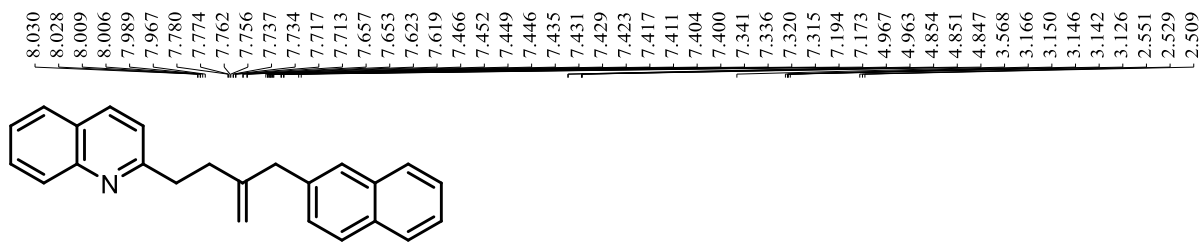

18,  $^1\text{H}$  NMR (400 MHz  $\text{CDCl}_3$ )

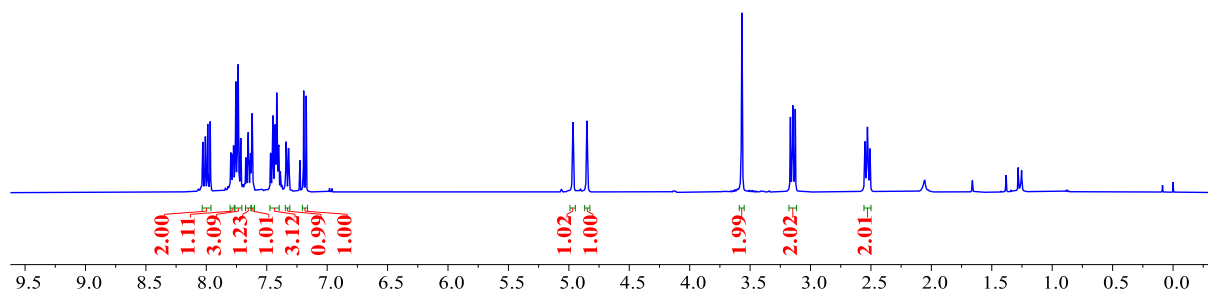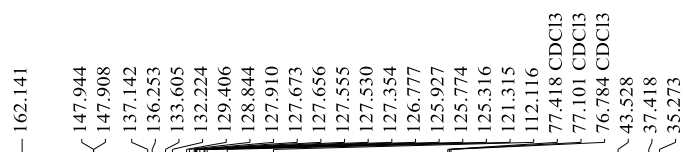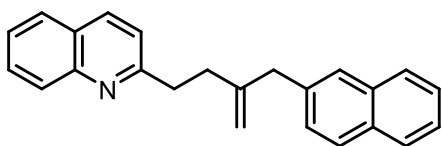

18,  $^{13}\text{C}$  NMR (101 MHz  $\text{CDCl}_3$ )

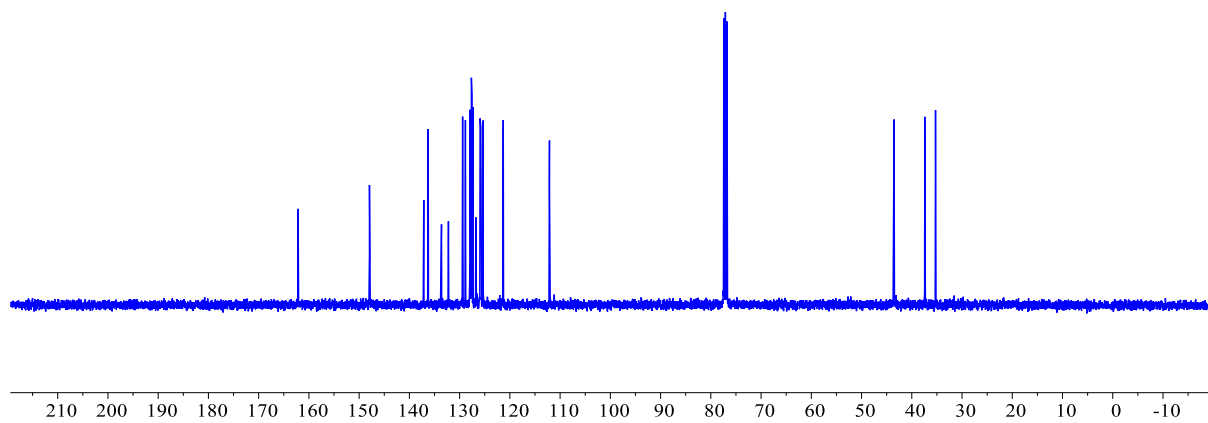

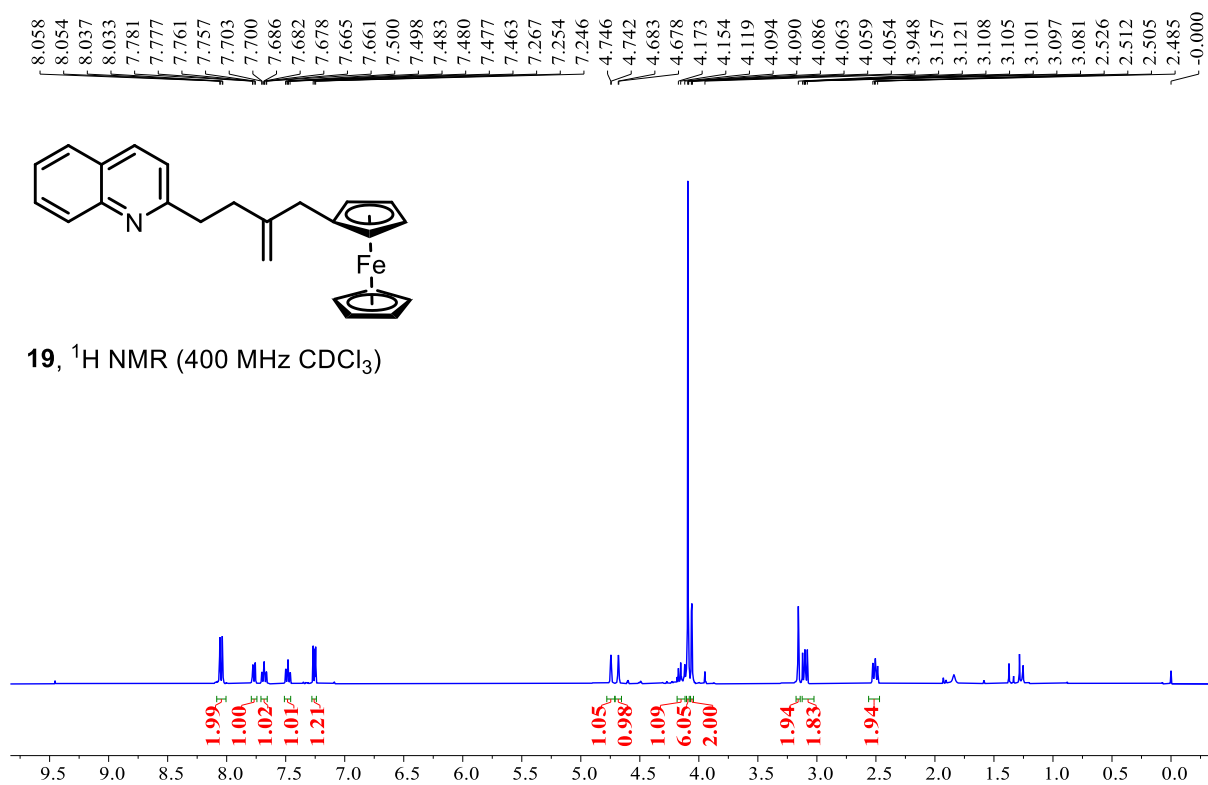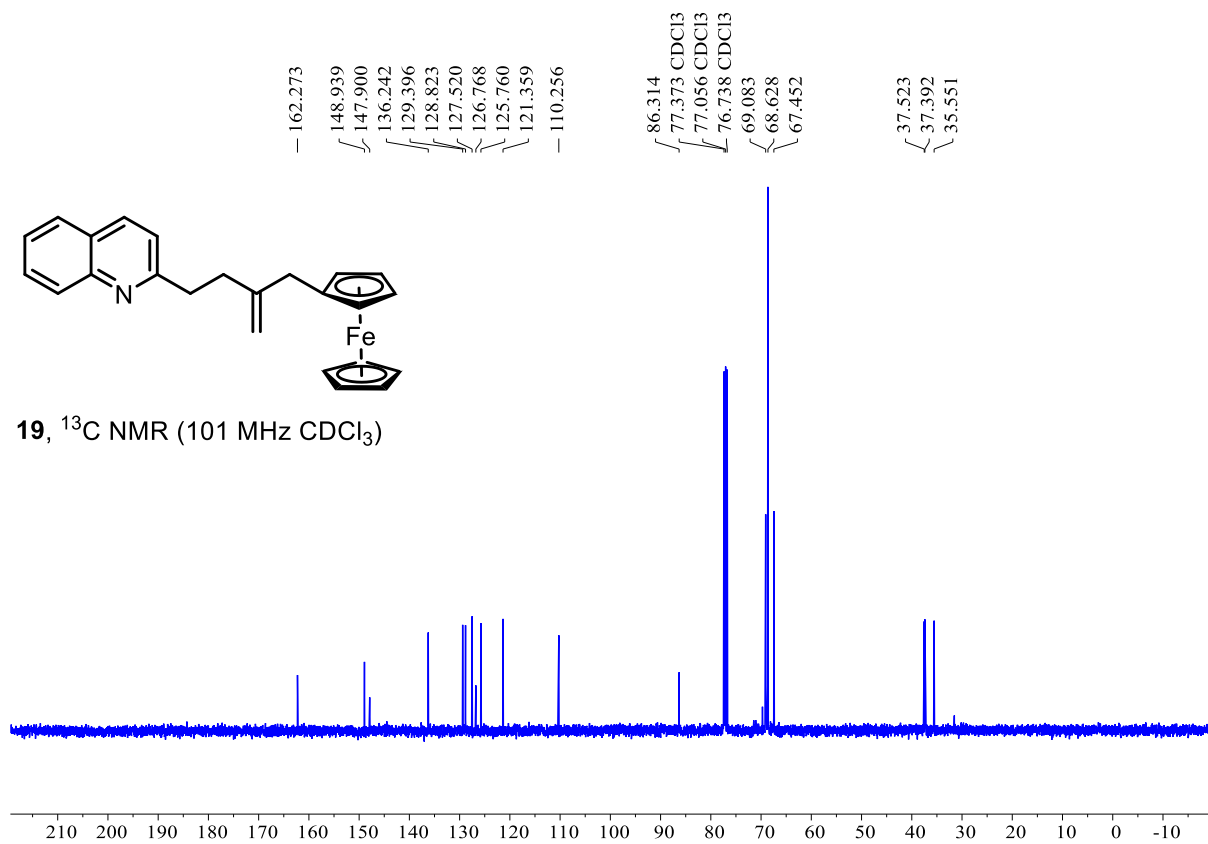

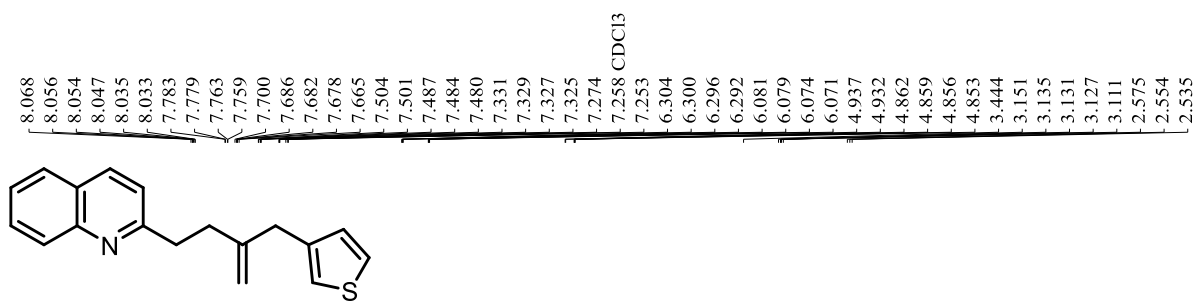

**20**, <sup>1</sup>H NMR (400 MHz CDCl<sub>3</sub>)

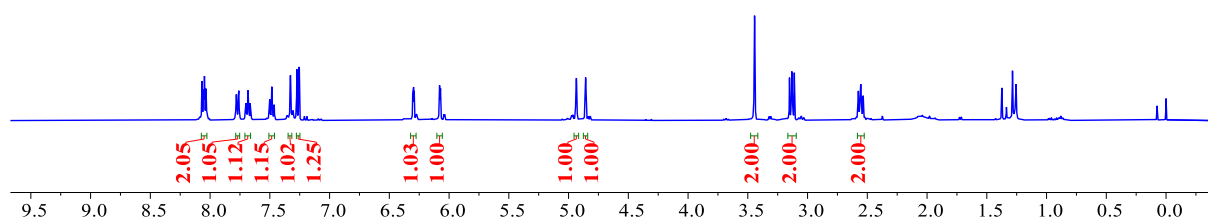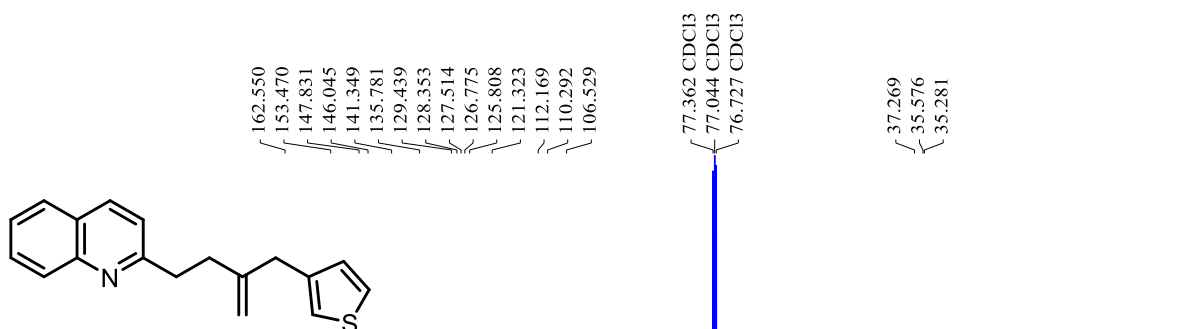

**20**, <sup>13</sup>C NMR (101 MHz CDCl<sub>3</sub>)

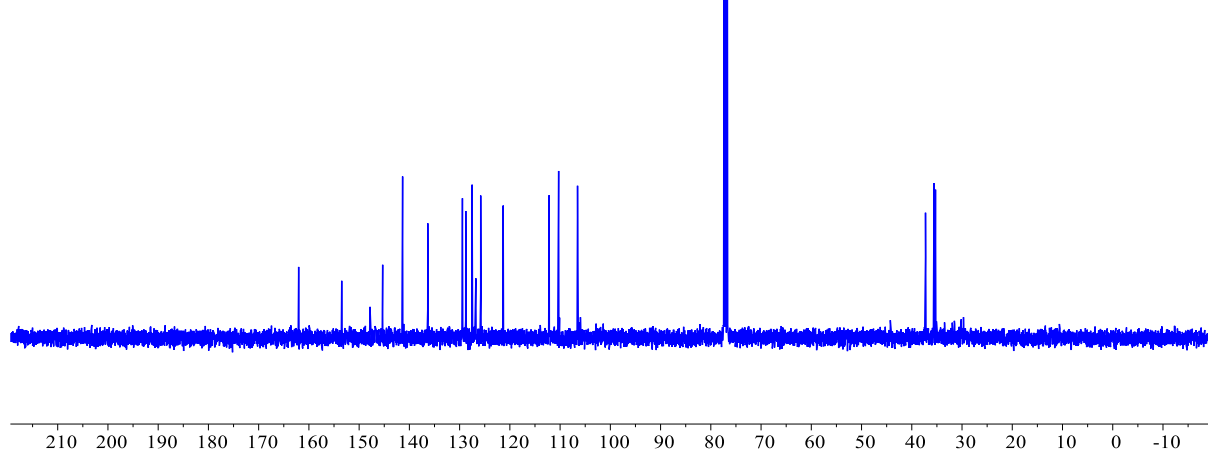

8.053  
8.043  
8.041  
8.032  
8.022  
8.019  
7.777  
7.773  
7.756  
7.753  
7.698  
7.694  
7.681  
7.677  
7.673  
7.660  
7.656  
7.498  
7.495  
7.481  
7.477  
7.474  
7.460  
7.254  
7.250  
7.242  
7.235  
7.229  
7.223  
6.983  
6.980  
6.976  
6.973  
6.930  
6.927  
6.918  
6.914  
4.911  
4.907  
4.821  
4.817  
3.427  
3.147  
3.131  
3.128  
3.123  
3.107  
2.548  
2.528  
2.508

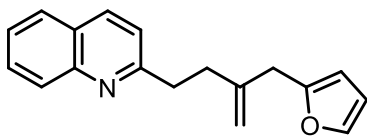

21,  $^1\text{H}$  NMR (400 MHz  $\text{CDCl}_3$ )

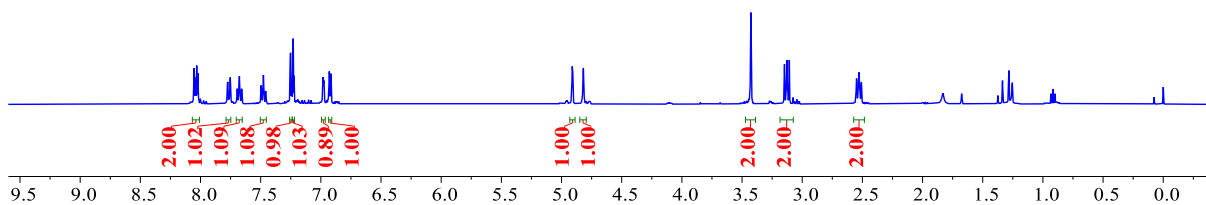

161.227  
147.897  
147.215  
140.025  
135.899  
129.402  
128.823  
128.680  
127.514  
126.765  
125.771  
125.312  
121.429  
121.297  
111.510  
77.365  $\text{CDCl}_3$   
77.047  $\text{CDCl}_3$   
76.729  $\text{CDCl}_3$   
37.717  
37.421  
35.248

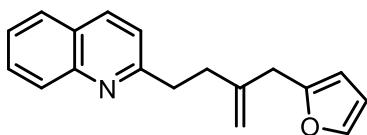

21,  $^{13}\text{C}$  NMR (101 MHz  $\text{CDCl}_3$ )

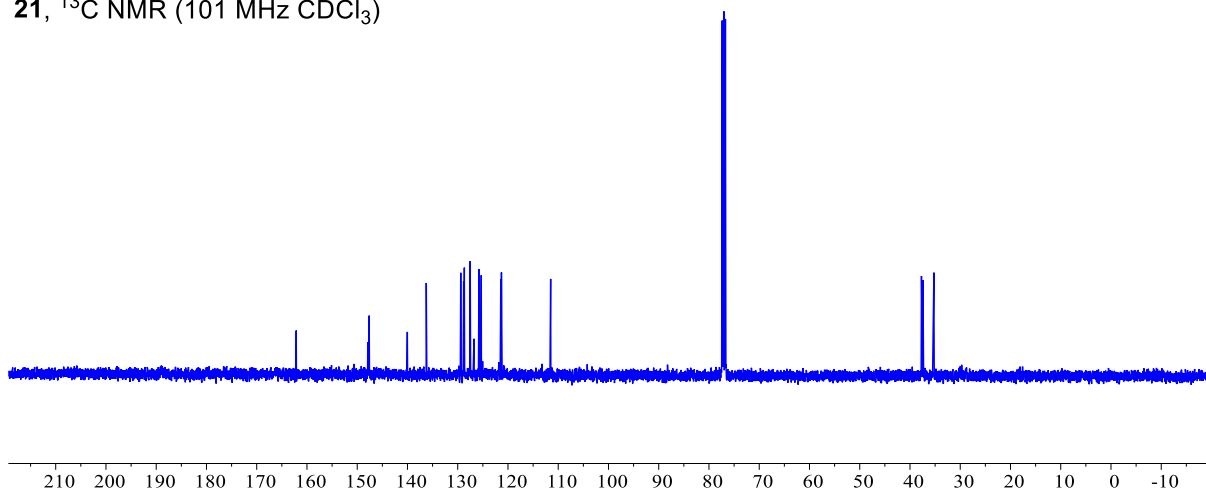



7.991  
7.982  
7.980  
7.970  
7.960  
7.704  
7.700  
7.683  
7.679  
7.605  
7.601  
7.420  
7.417  
7.400  
7.397  
7.236  
7.214  
4.726  
4.722  
4.690  
4.686  
3.065  
3.048  
3.044  
3.039  
3.024  
2.474  
2.456  
2.452  
2.434  
2.035  
2.032  
2.014  
1.996  
1.993  
1.378  
1.231  
1.226  
1.219  
1.214  
1.206  
1.201  
1.197  
1.191  
1.178  
0.818  
0.814  
0.808  
0.801  
0.784

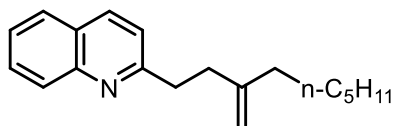

**23**,  $^1\text{H}$  NMR (400 MHz  $\text{CDCl}_3$ )

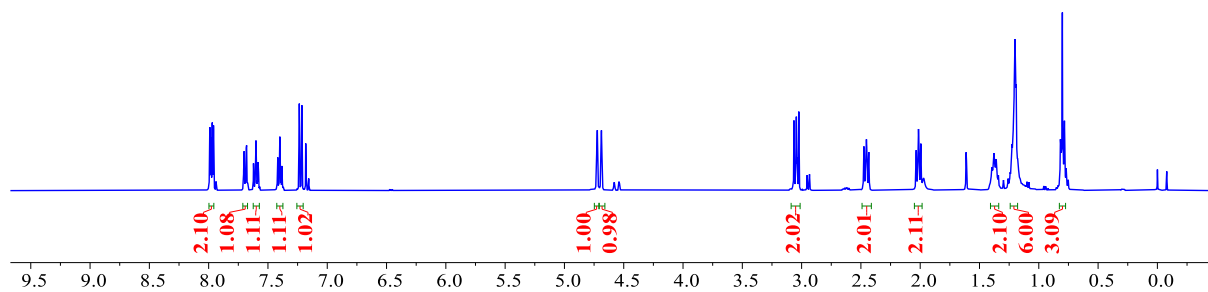

162.458  
149.690  
147.919  
136.220  
129.366  
128.827  
127.506  
126.759  
125.723  
121.369  
108.790  
77.369  $\text{CDCl}_3$   
77.051  $\text{CDCl}_3$   
76.733  $\text{CDCl}_3$   
37.629  
36.395  
35.912  
31.793  
29.102  
27.811  
22.660  
14.129

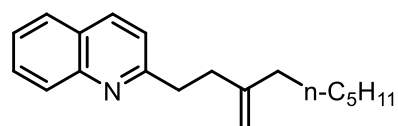

**23**,  $^{13}\text{C}$  NMR (101 MHz  $\text{CDCl}_3$ )

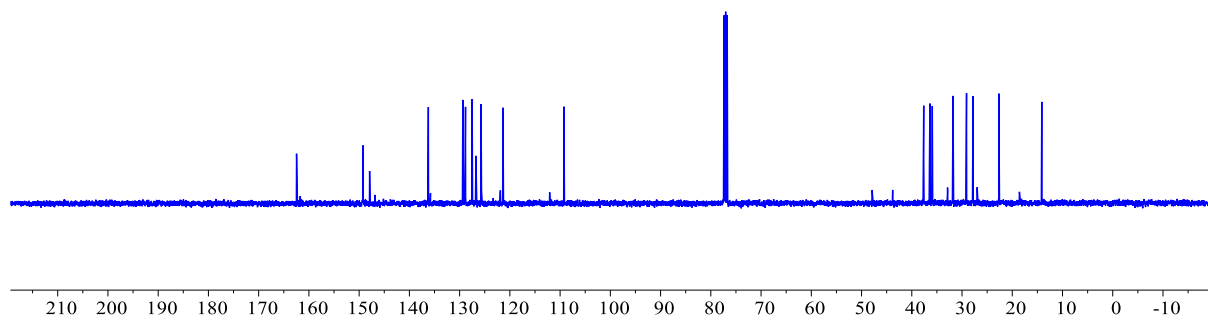

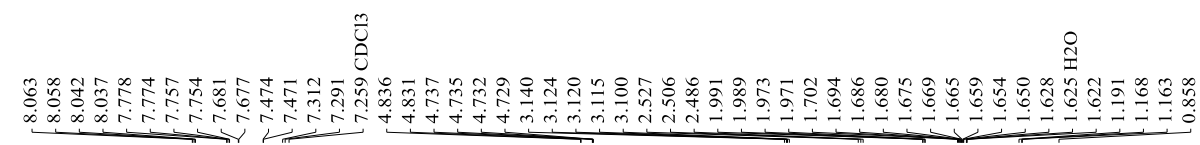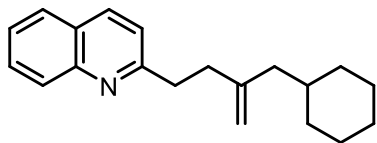

24, <sup>1</sup>H NMR (400 MHz CDCl<sub>3</sub>)

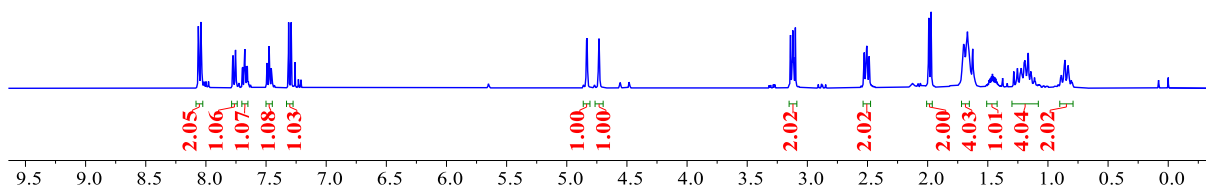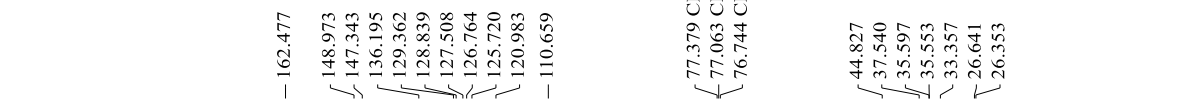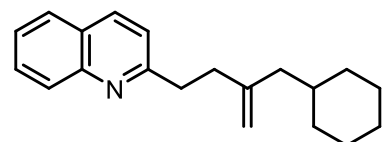

24, <sup>13</sup>C NMR (101 MHz CDCl<sub>3</sub>)

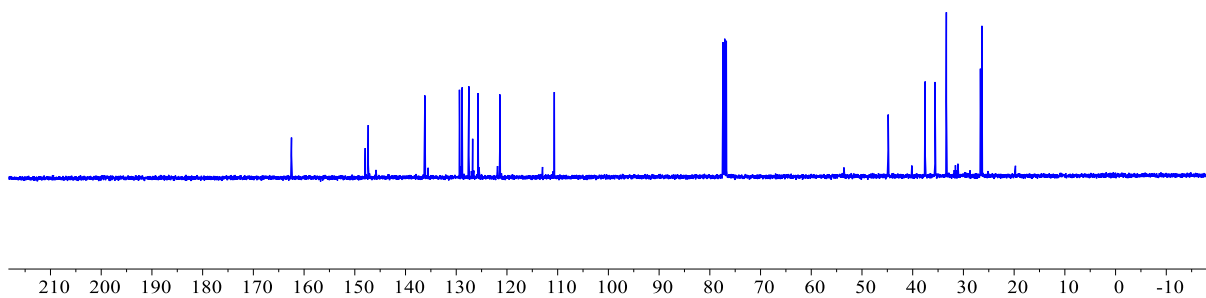

7.971  
7.966  
7.950  
7.945  
7.685  
7.681  
7.664  
7.661  
7.586  
7.383  
7.213  
7.192  
4.788  
4.784  
4.672  
4.668  
3.851  
3.845  
3.840  
3.827  
3.822  
3.816  
3.811  
3.275  
3.270  
3.246  
3.241  
3.216  
3.211  
3.055  
3.039  
3.036  
3.031  
3.015  
2.456  
2.435  
2.415  
1.949  
1.931  
1.489  
1.484  
1.461  
1.457  
1.451  
1.447  
1.191  
1.164  
1.156  
1.152  
1.145

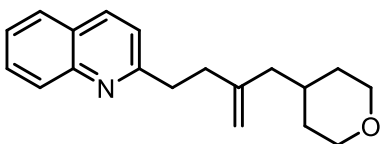

25,  $^1\text{H}$  NMR (400 MHz  $\text{CDCl}_3$ )

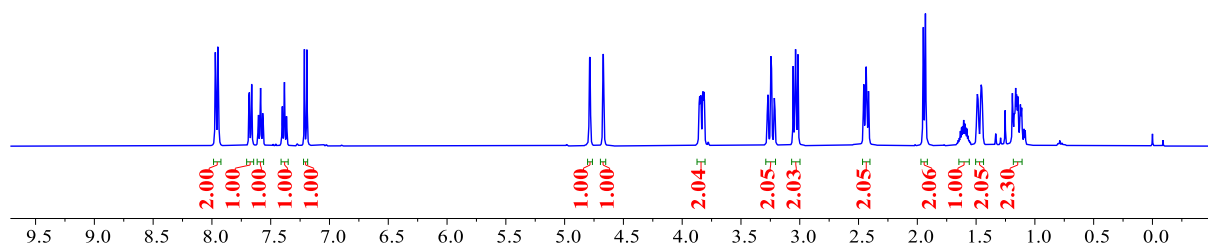

162.171  
147.898  
146.164  
136.245  
129.414  
128.771  
127.514  
126.751  
125.777  
121.385  
111.362  
77.437  $\text{CDCl}_3$   
77.119  $\text{CDCl}_3$   
76.802  $\text{CDCl}_3$   
68.035  
44.205  
37.407  
35.449  
33.124  
32.933

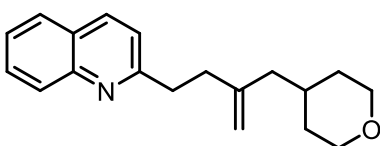

25,  $^{13}\text{C}$  NMR (101 MHz  $\text{CDCl}_3$ )

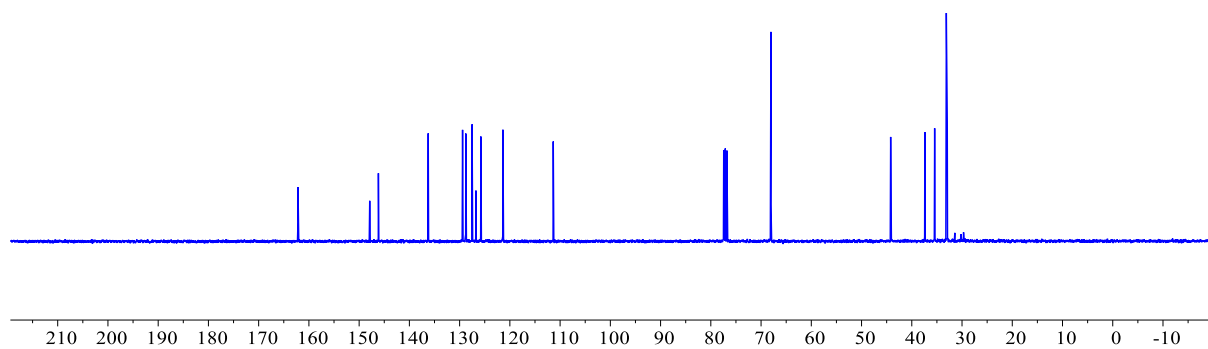

8.056  
8.035  
8.025  
8.004  
7.749  
7.746  
7.729  
7.726  
7.661  
7.657  
7.652  
7.639  
7.472  
7.468  
7.454  
7.451  
7.448  
7.277  
7.262  
7.256  
7.240  
7.176  
7.173  
7.158  
7.153  
7.144  
7.141  
4.841  
4.836  
4.792  
3.128  
3.115  
3.111  
3.108  
3.103  
3.087  
2.625  
2.606  
2.586  
2.560  
2.539  
2.519  
2.157  
2.138  
2.118  
1.818  
1.813  
1.795  
1.775  
1.745

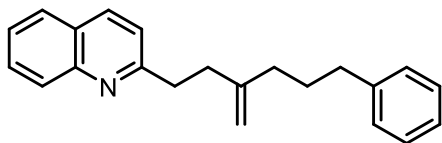

26,  $^1\text{H}$  NMR (400 MHz  $\text{CDCl}_3$ )

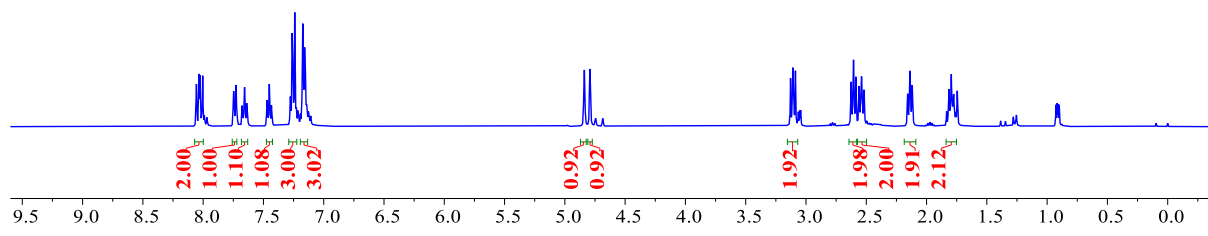

148.620  
147.588  
142.009  
136.256  
129.420  
128.897  
128.339  
127.560  
126.802  
125.780  
121.031  
- 109.742  
77.473  $\text{CDCl}_3$   
77.155  $\text{CDCl}_3$   
76.837  $\text{CDCl}_3$   
37.616  
35.944  
35.922  
35.619  
29.570

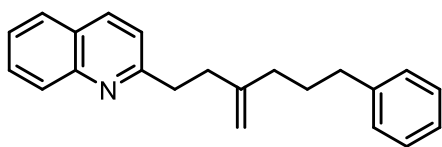

26,  $^{13}\text{C}$  NMR (101 MHz  $\text{CDCl}_3$ )

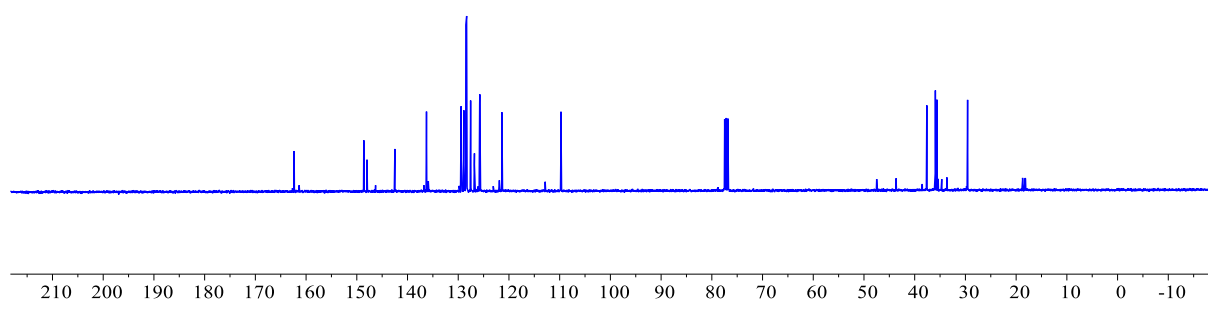

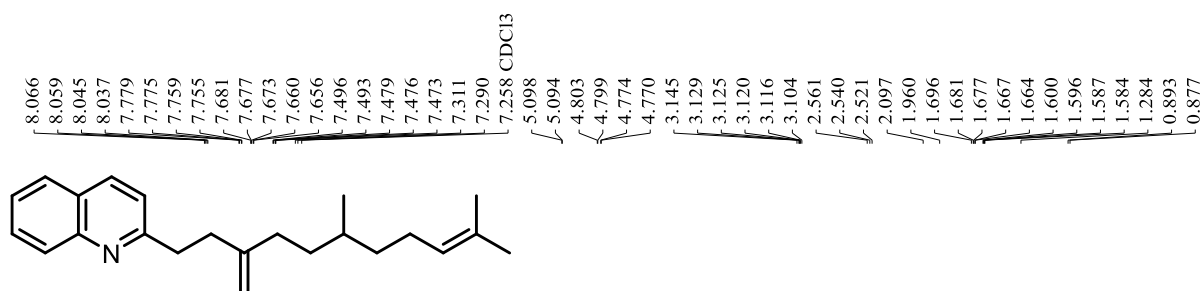

27,  $^1\text{H NMR}$  (400 MHz  $\text{CDCl}_3$ )

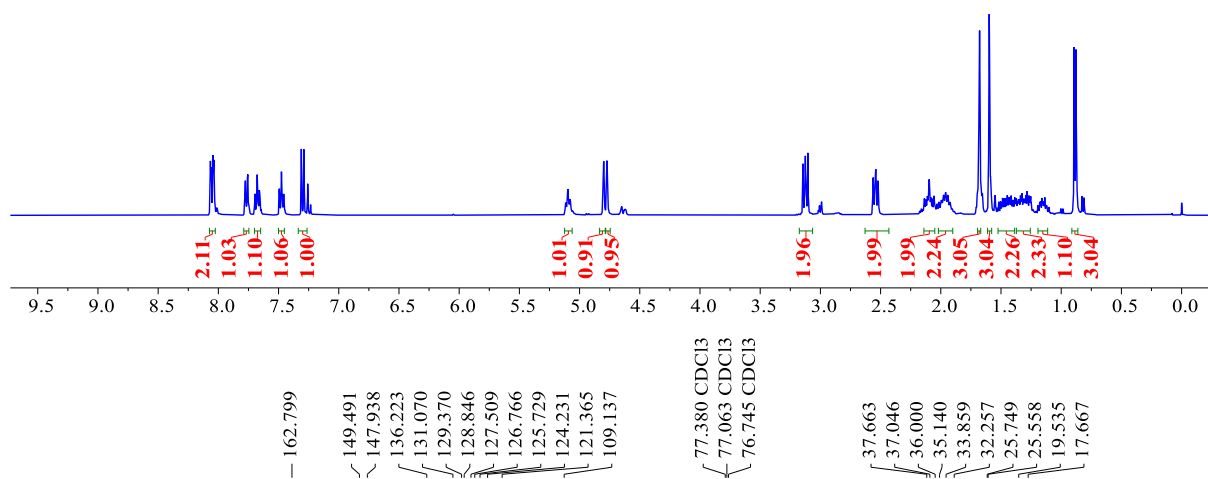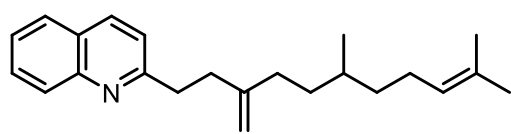

27,  $^{13}\text{C NMR}$  (101 MHz  $\text{CDCl}_3$ )

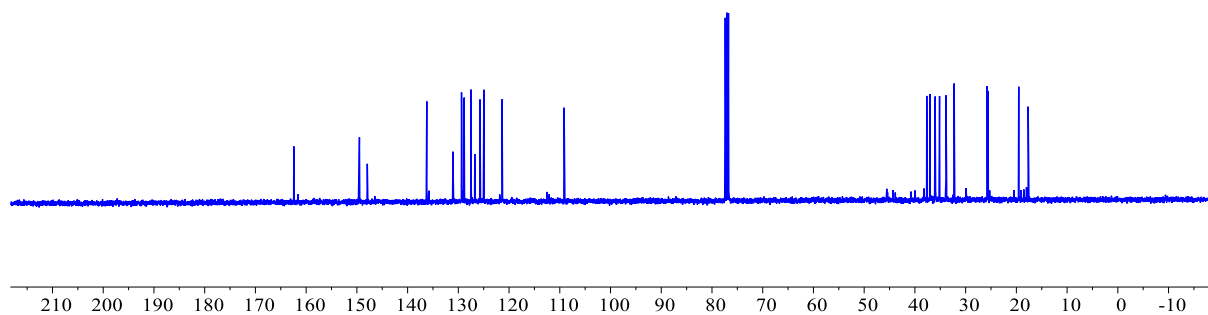

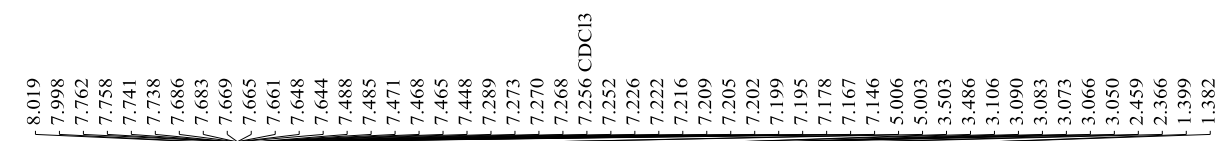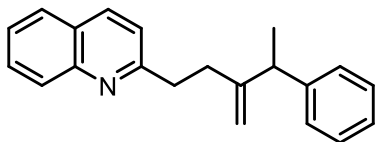

28, <sup>1</sup>H NMR (400 MHz CDCl<sub>3</sub>)

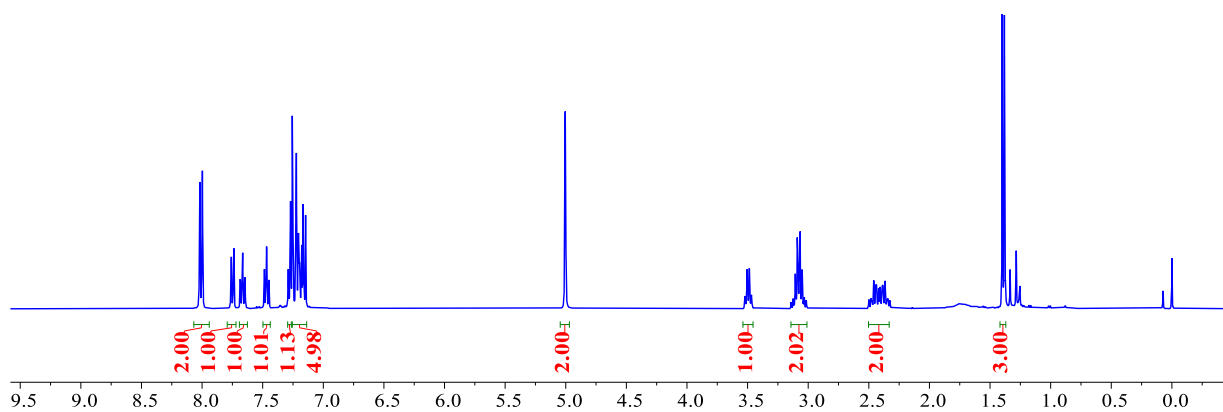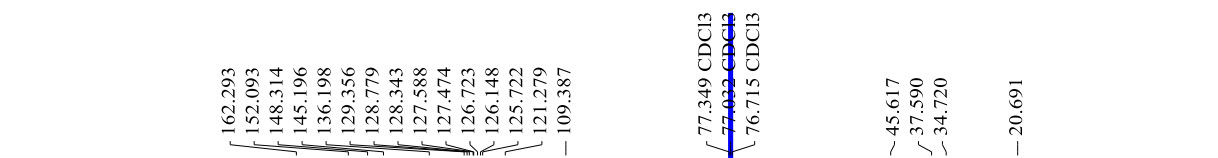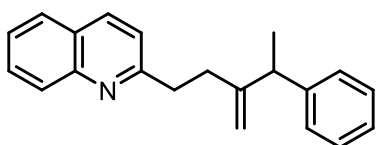

28, <sup>13</sup>C NMR (101 MHz CDCl<sub>3</sub>)

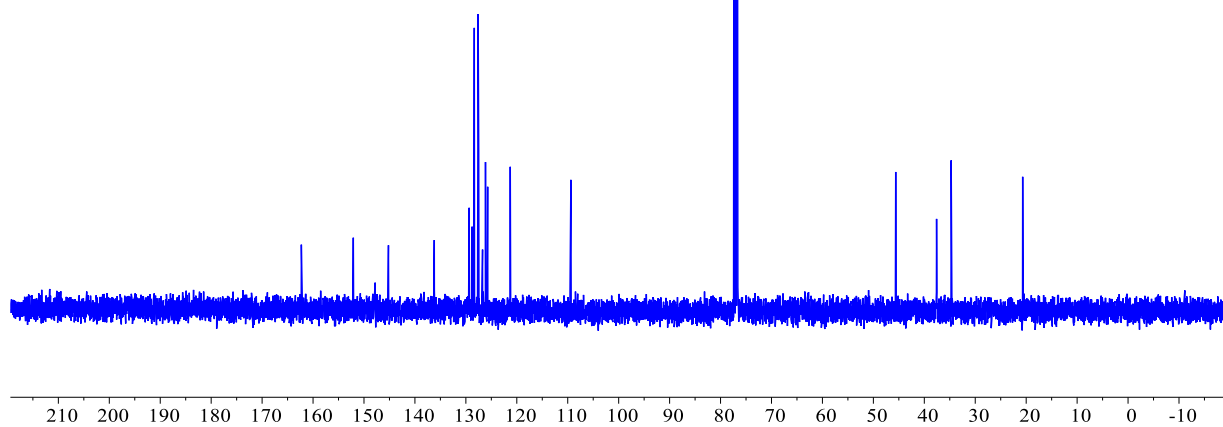

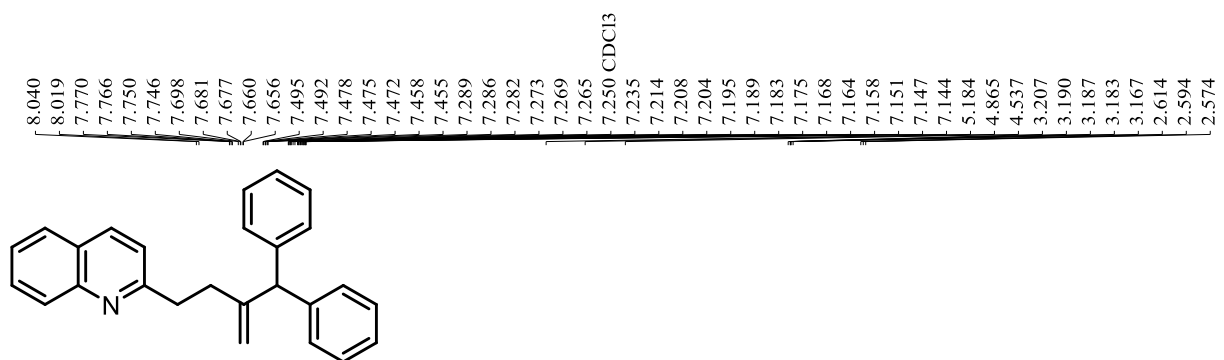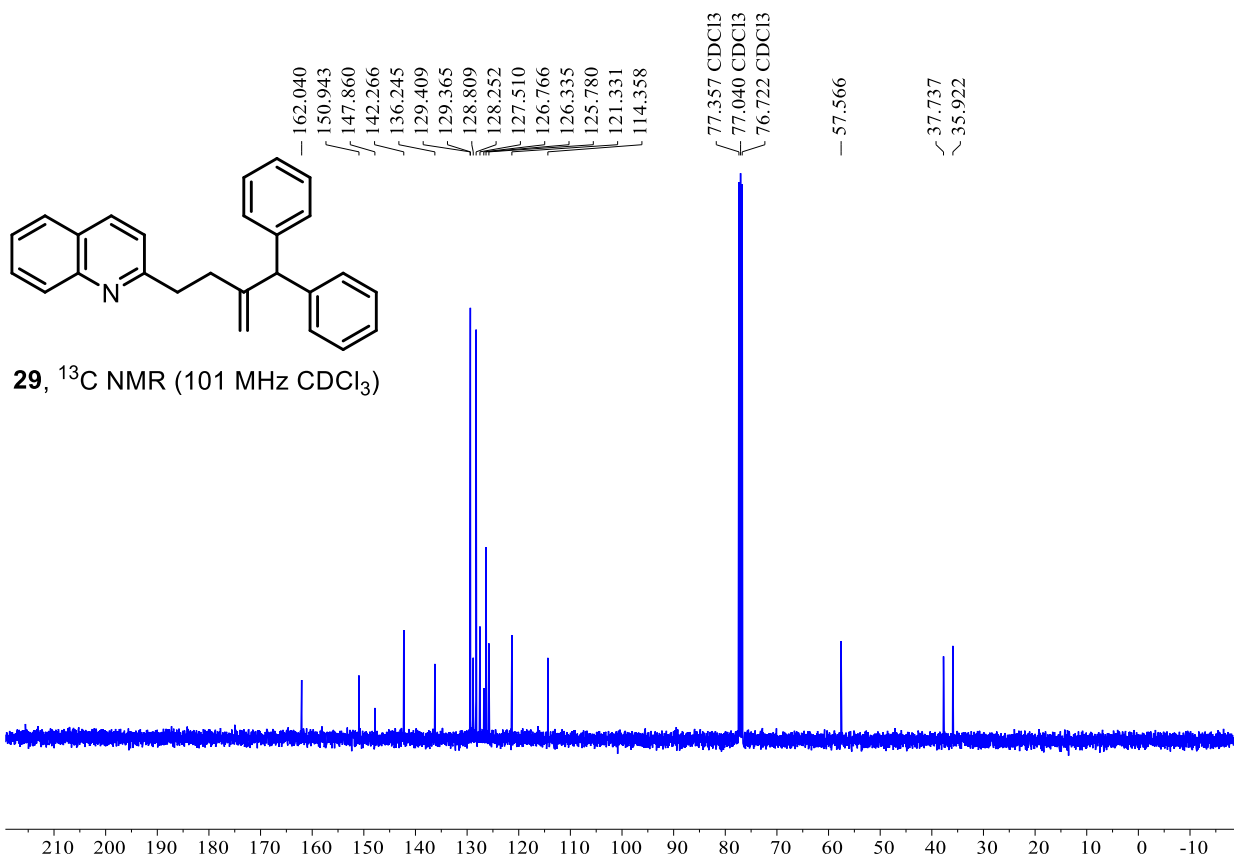

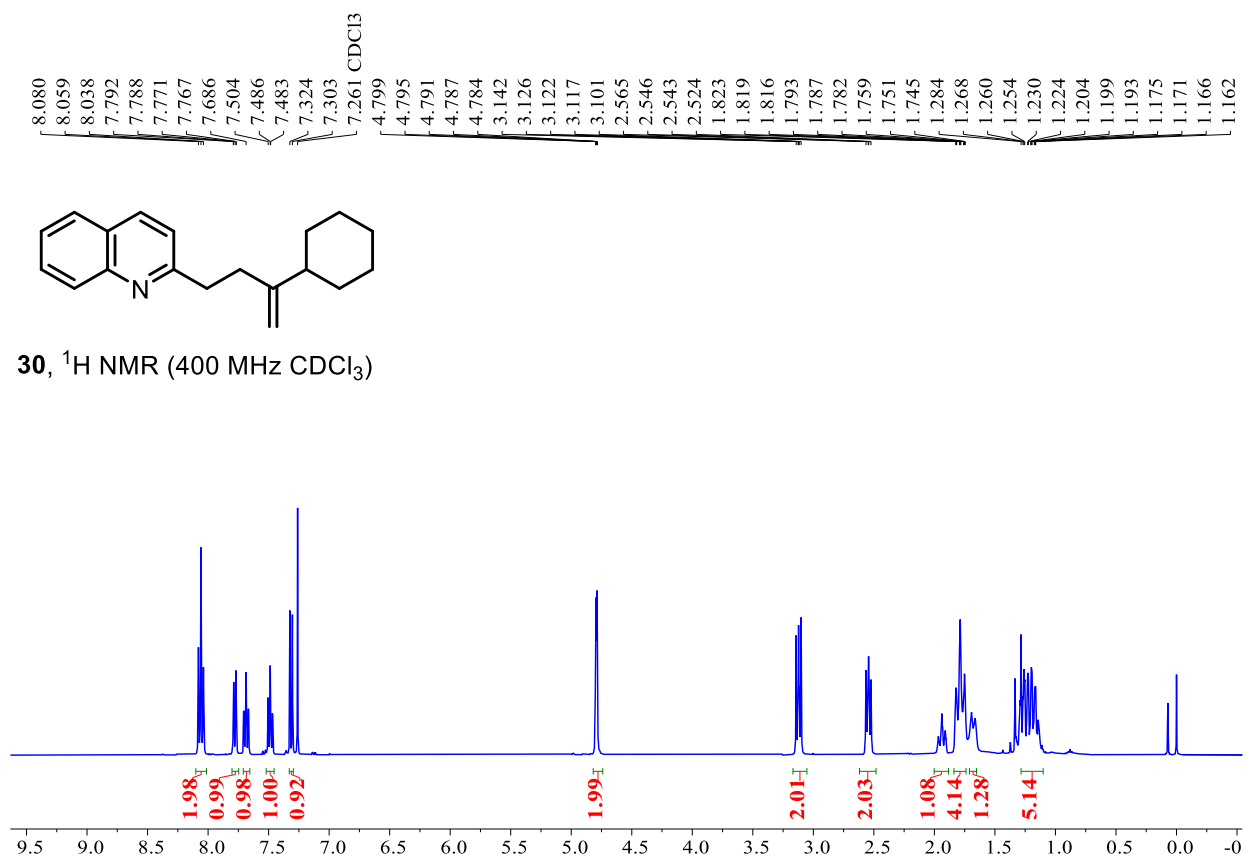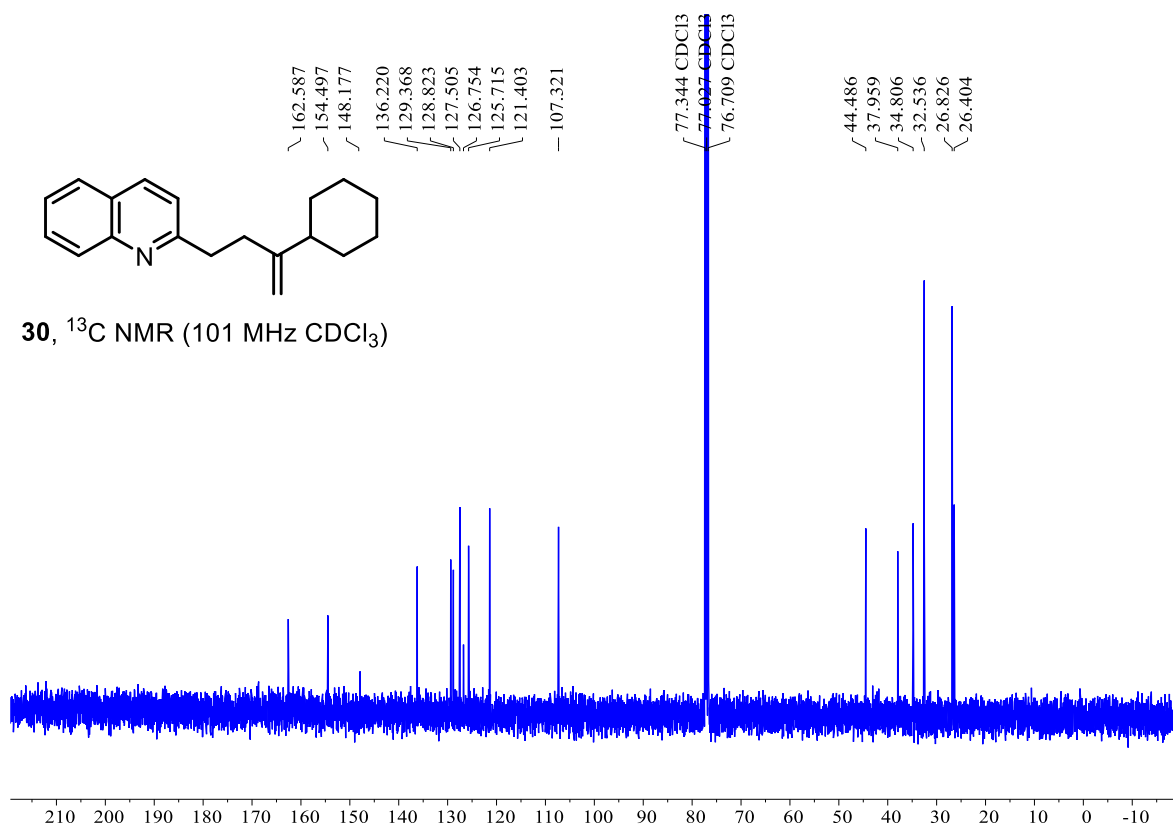

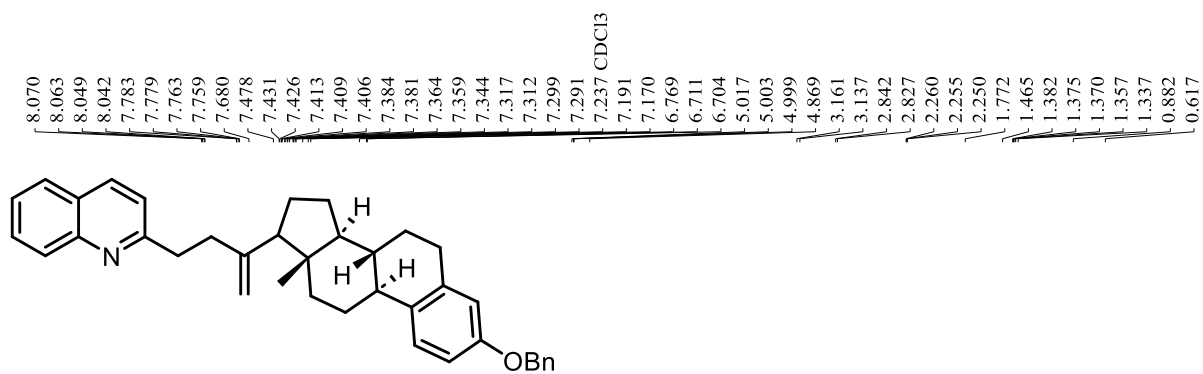

**31**, <sup>1</sup>H NMR (400 MHz CDCl<sub>3</sub>)

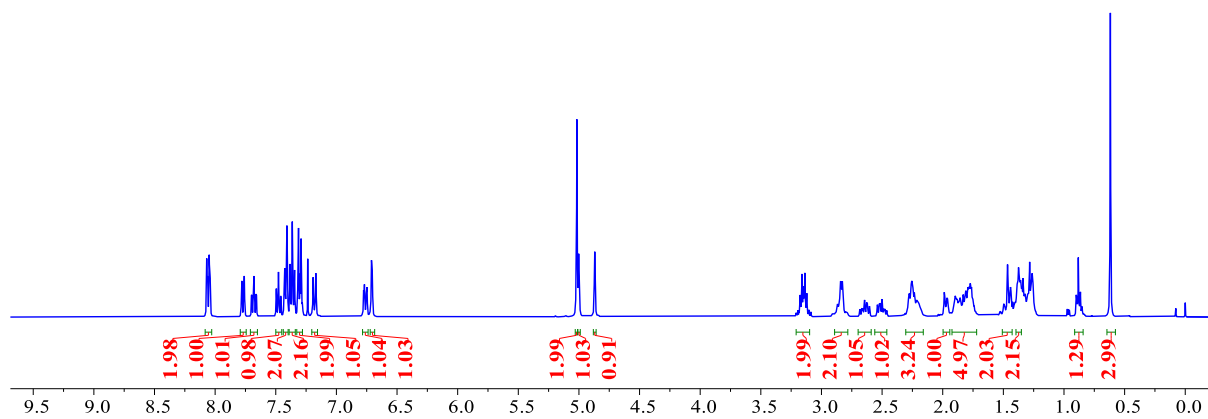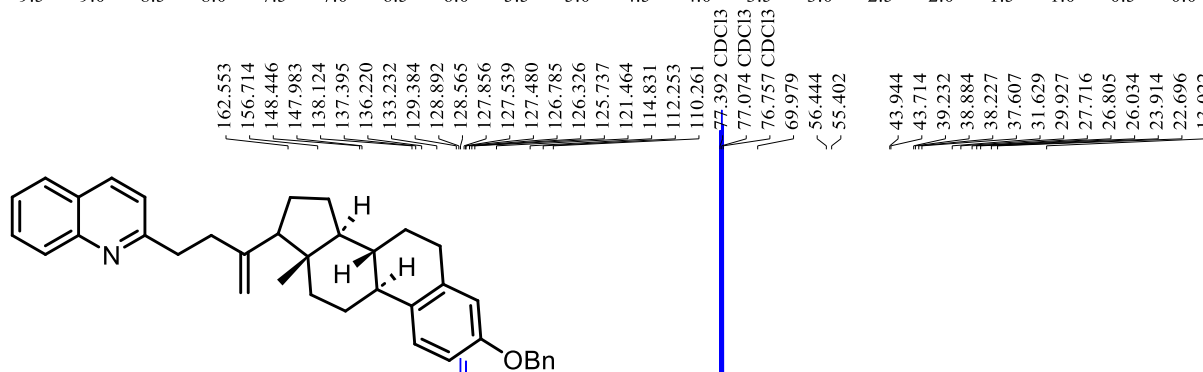

**31**, <sup>13</sup>C NMR (101 MHz CDCl<sub>3</sub>)

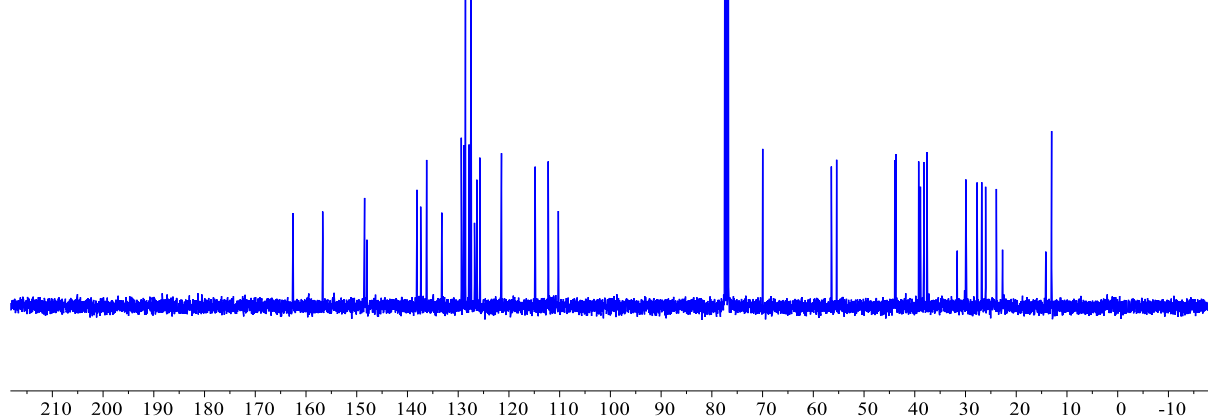

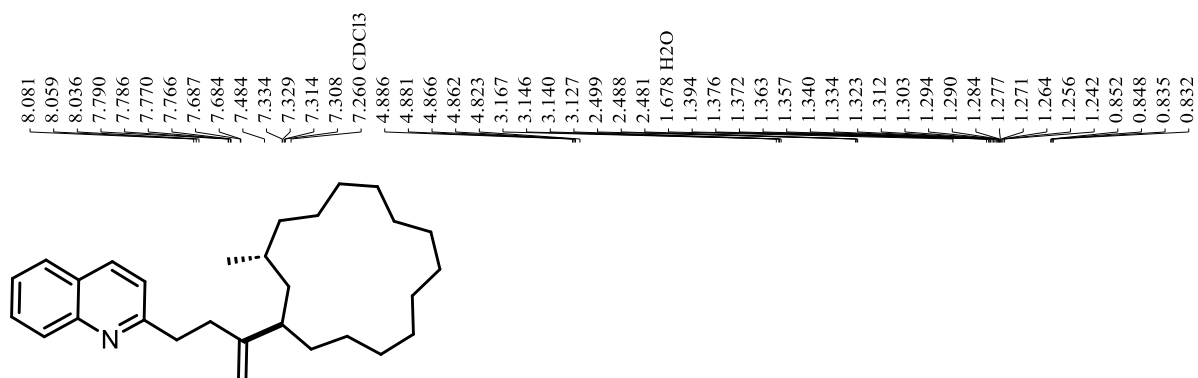

**32**, <sup>1</sup>H NMR (400 MHz CDCl<sub>3</sub>)

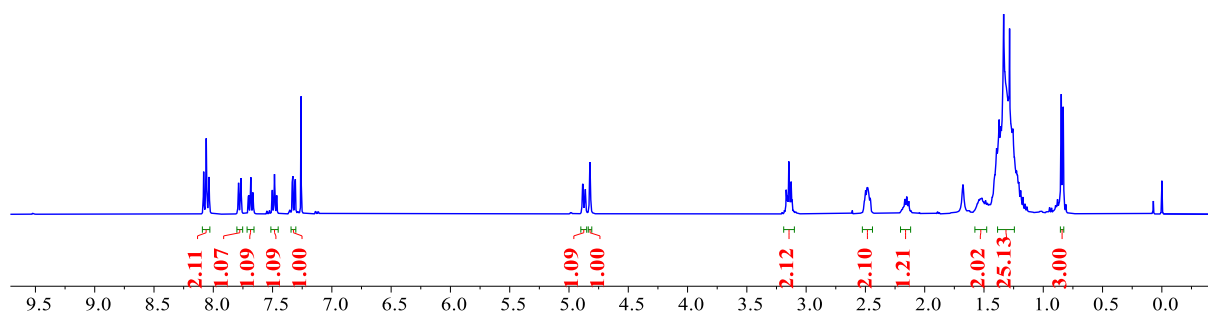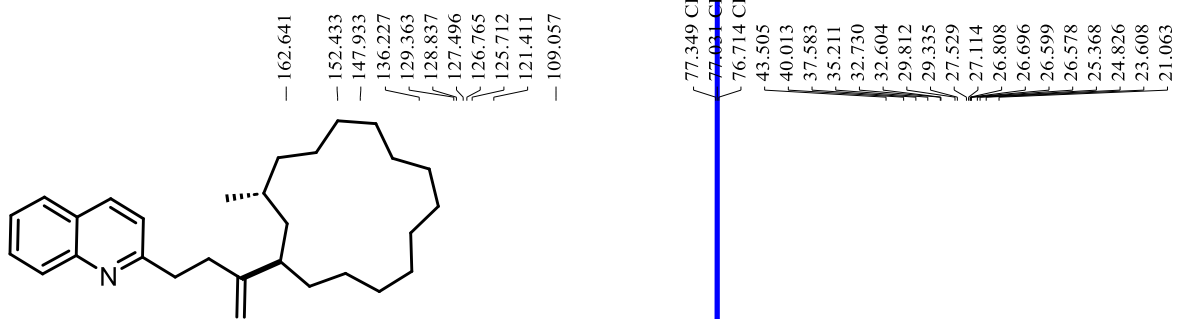

**32**, <sup>13</sup>C NMR (101 MHz CDCl<sub>3</sub>)

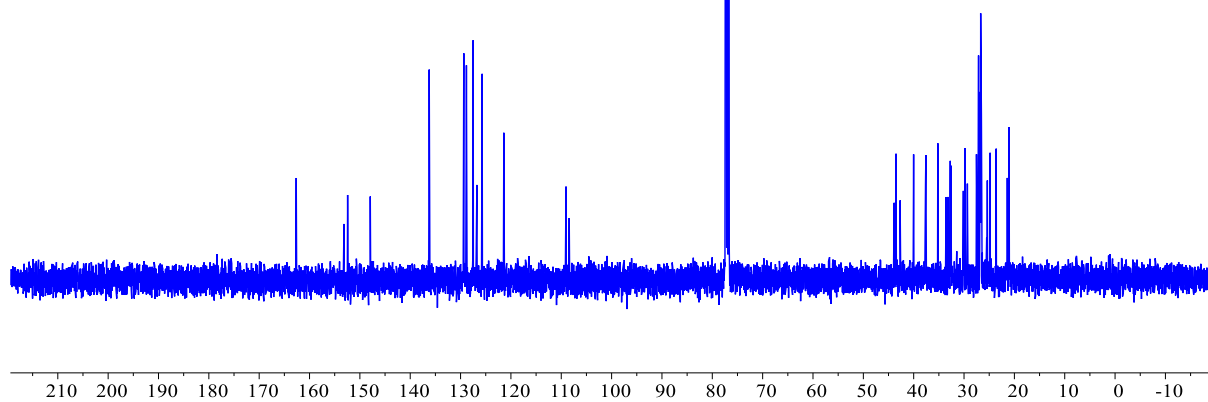

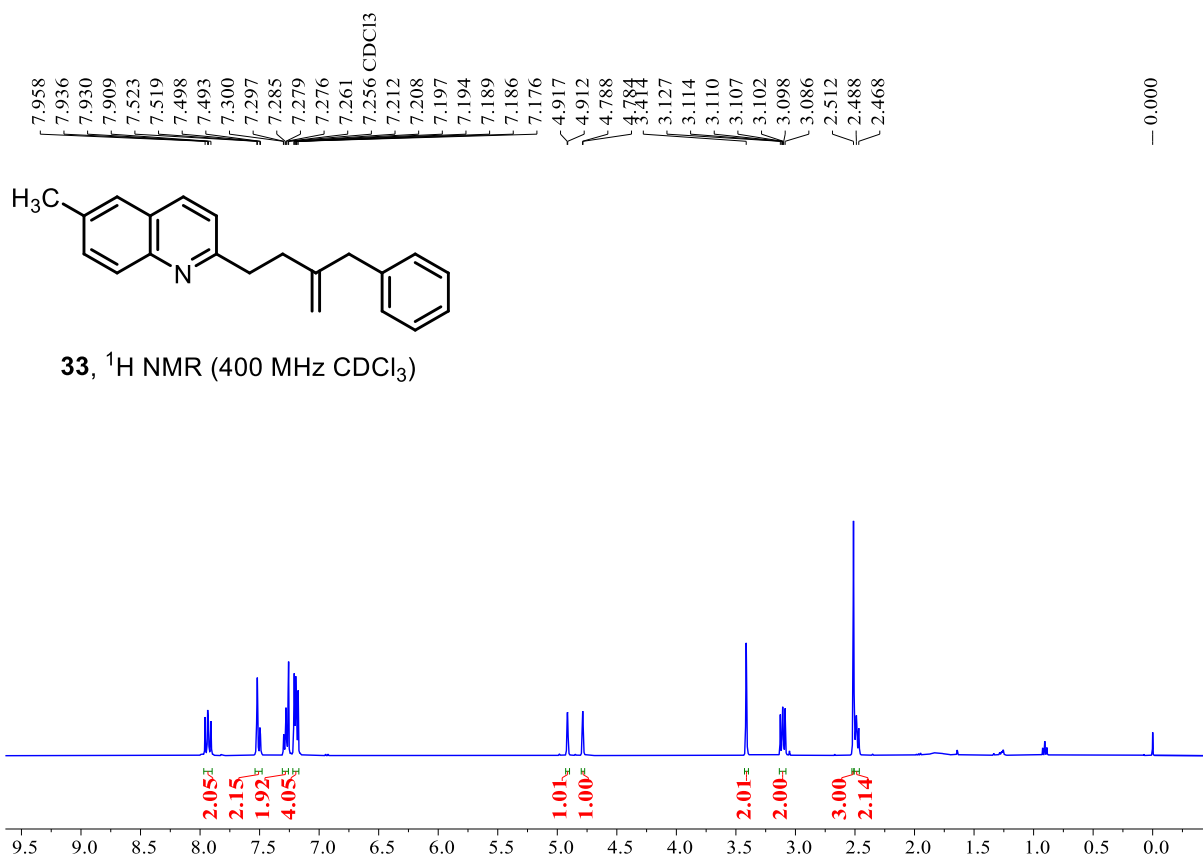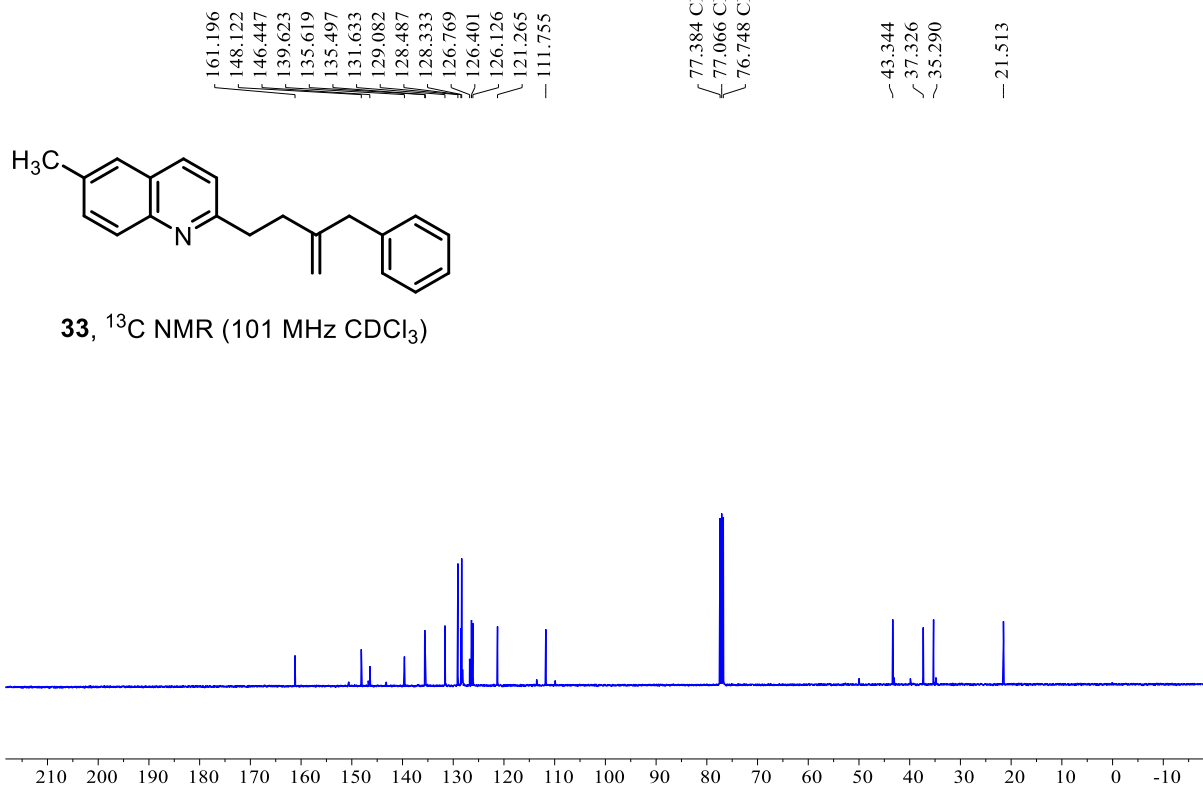

7.925  
7.904  
7.884  
7.291  
7.284  
7.268  
7.261  
7.225  
7.222  
7.218  
7.210  
7.204  
7.201  
7.186 CDCl<sub>3</sub>  
7.138  
7.134  
7.127  
7.119  
7.113  
7.105  
7.101  
6.977  
6.970  
4.843  
4.839  
4.720  
4.715  
3.855  
3.846  
3.831  
3.343  
3.070  
3.058  
3.054  
3.051  
3.046  
3.042  
3.030  
2.440  
2.419  
2.399

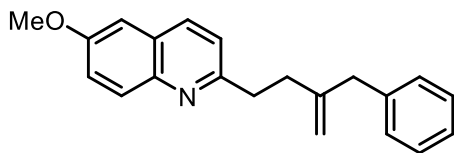

**34**, <sup>1</sup>H NMR (400 MHz CDCl<sub>3</sub>)

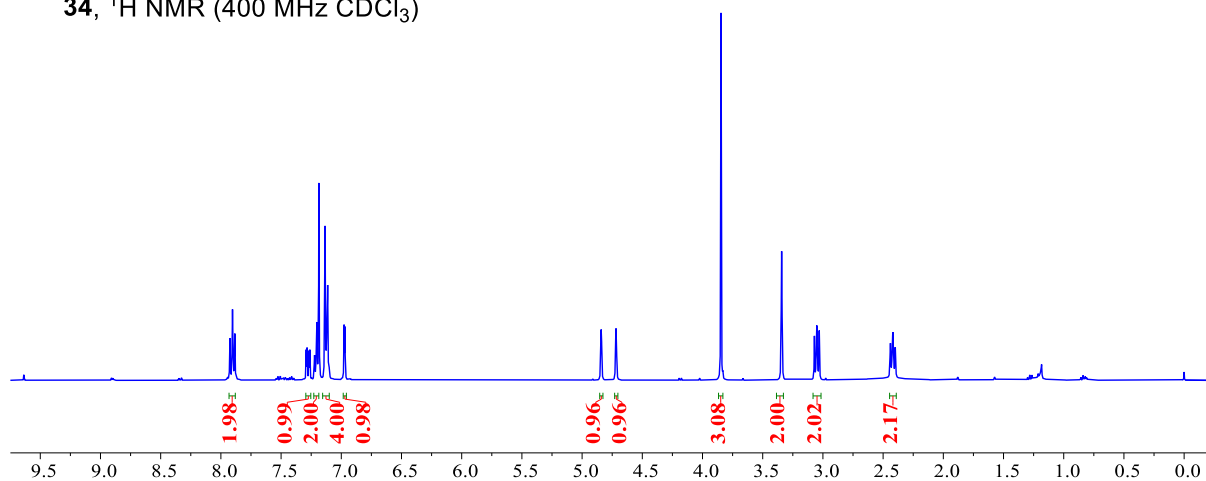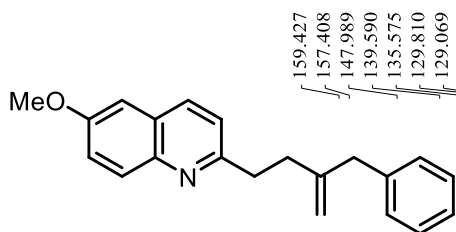

**34**, <sup>13</sup>C NMR (101 MHz CDCl<sub>3</sub>)

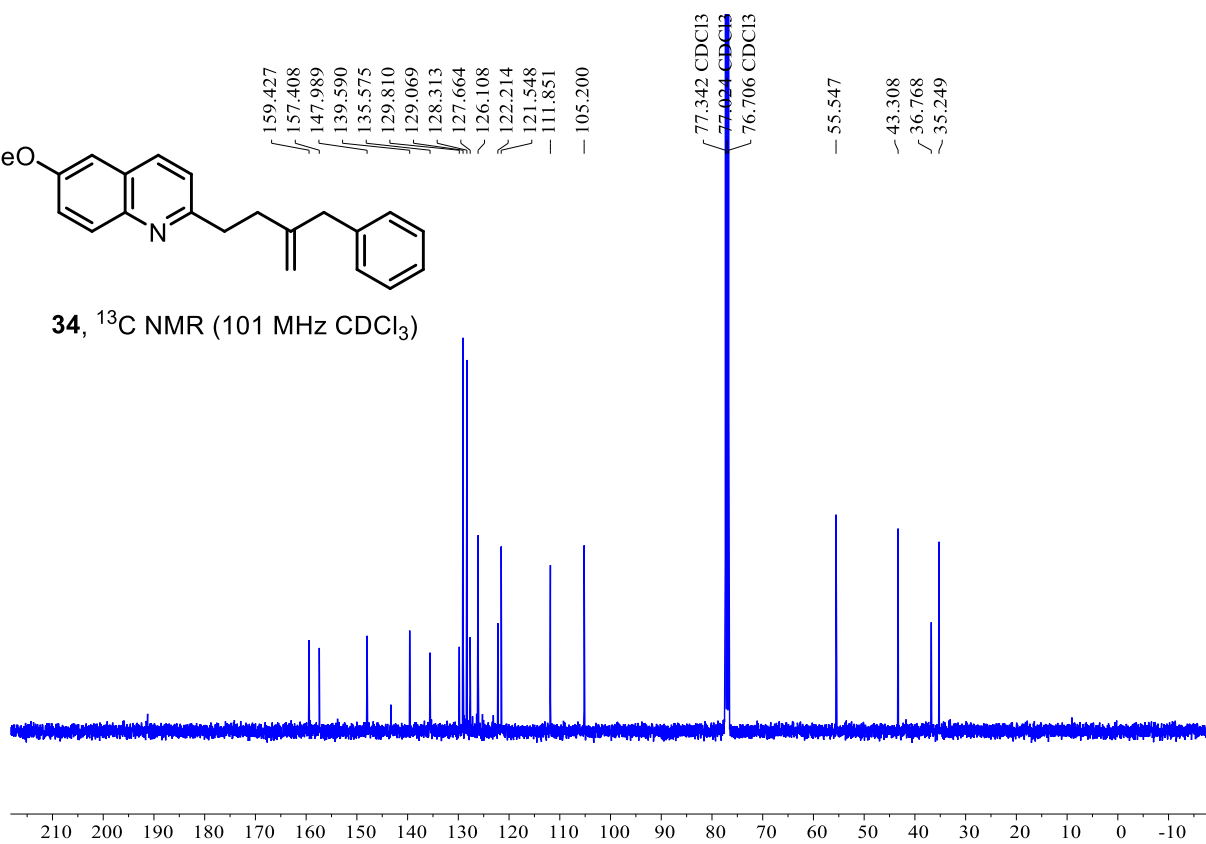

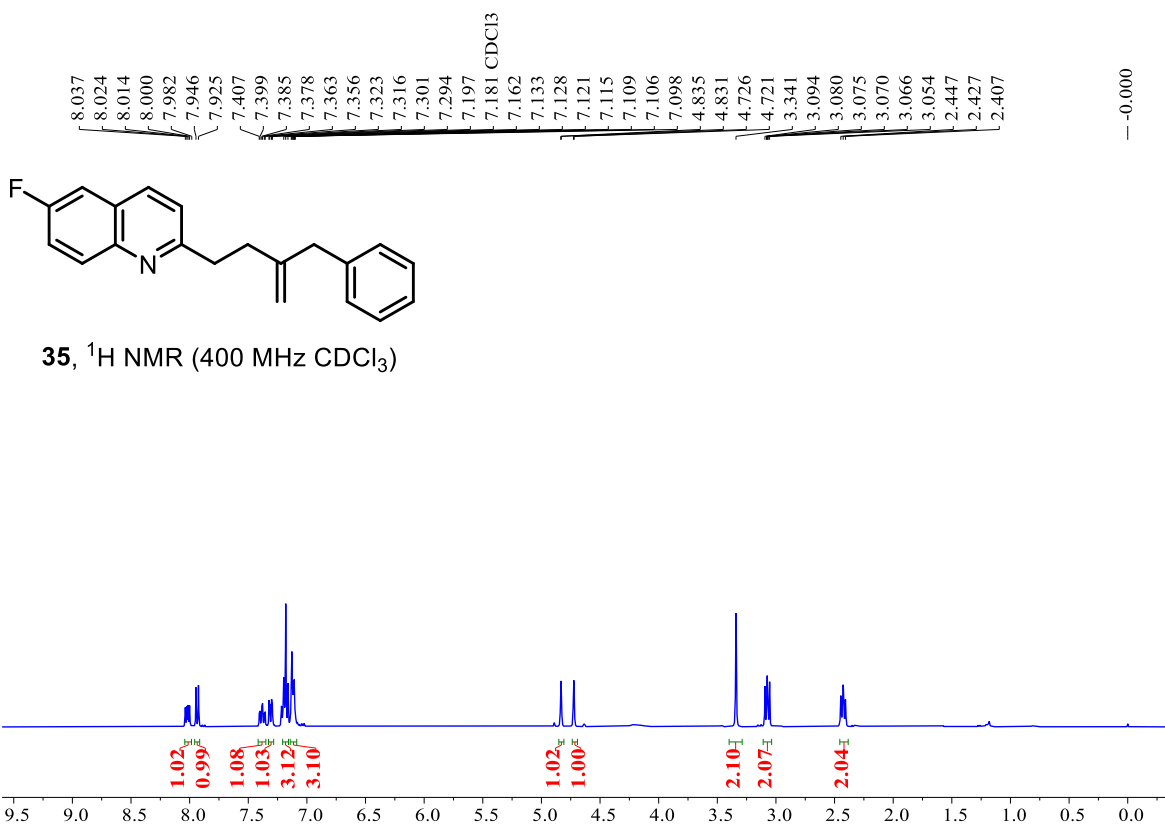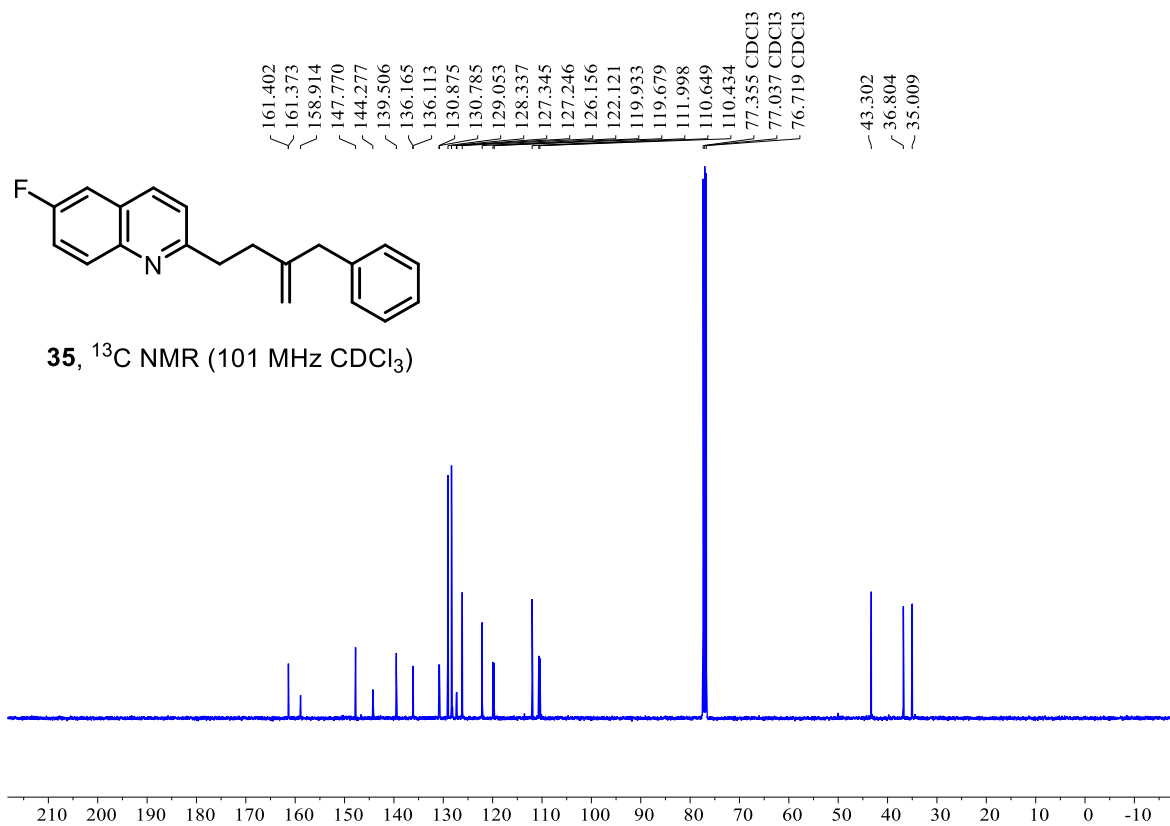

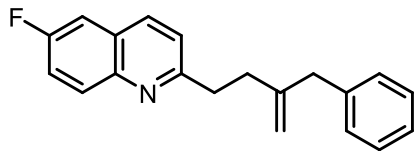

35, <sup>19</sup>F NMR (376 MHz CDCl<sub>3</sub>)

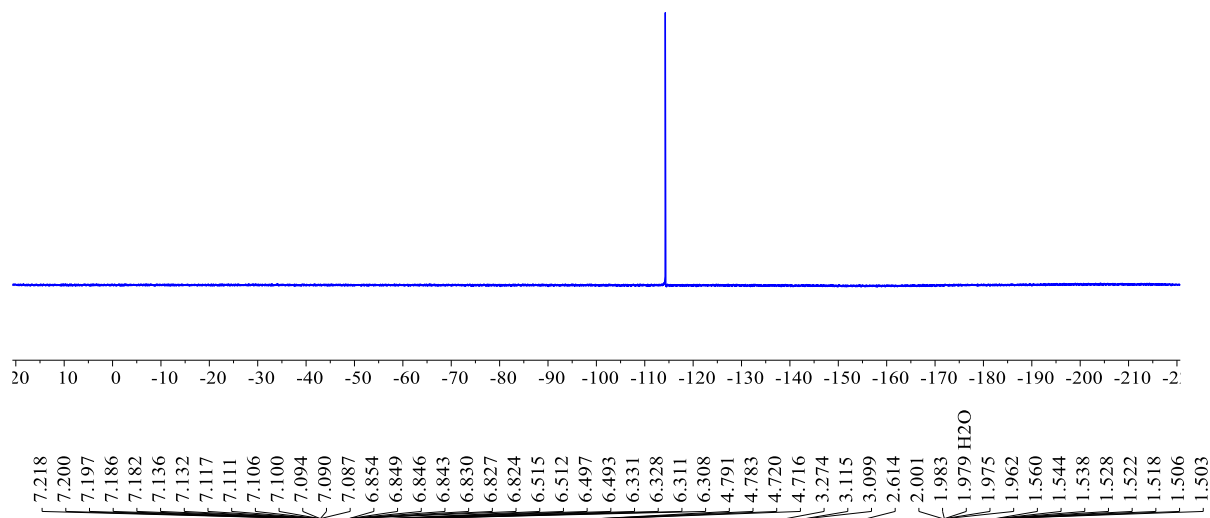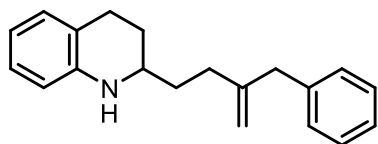

36, <sup>1</sup>H NMR (400 MHz CDCl<sub>3</sub>)

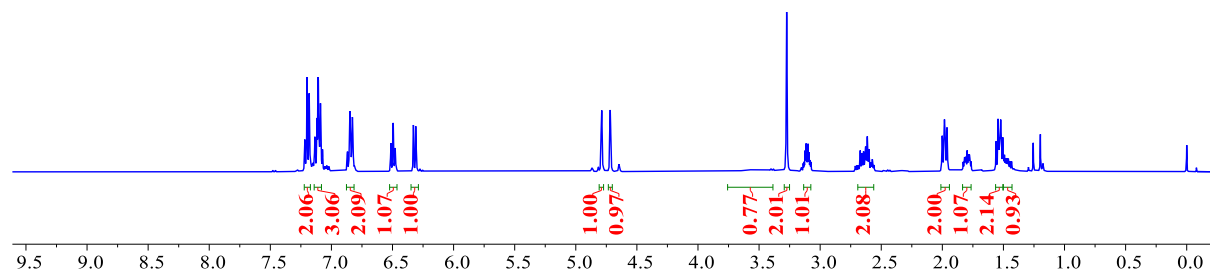

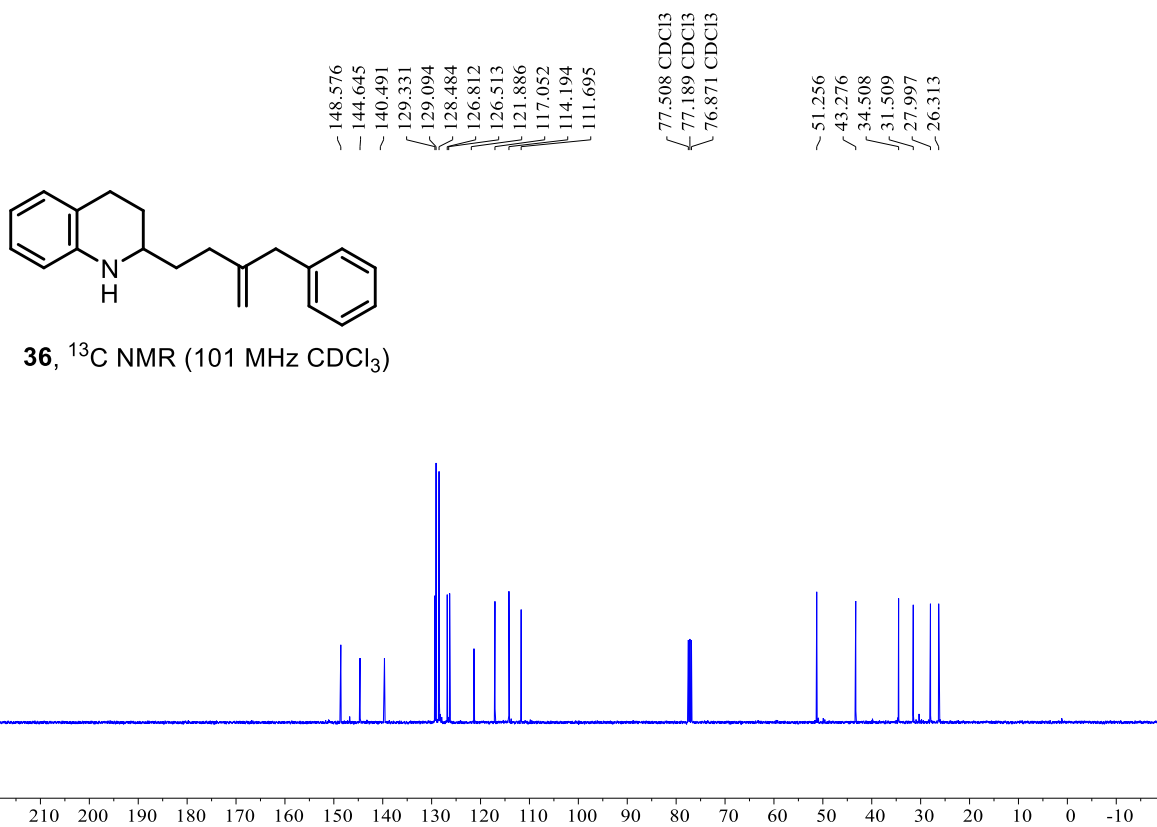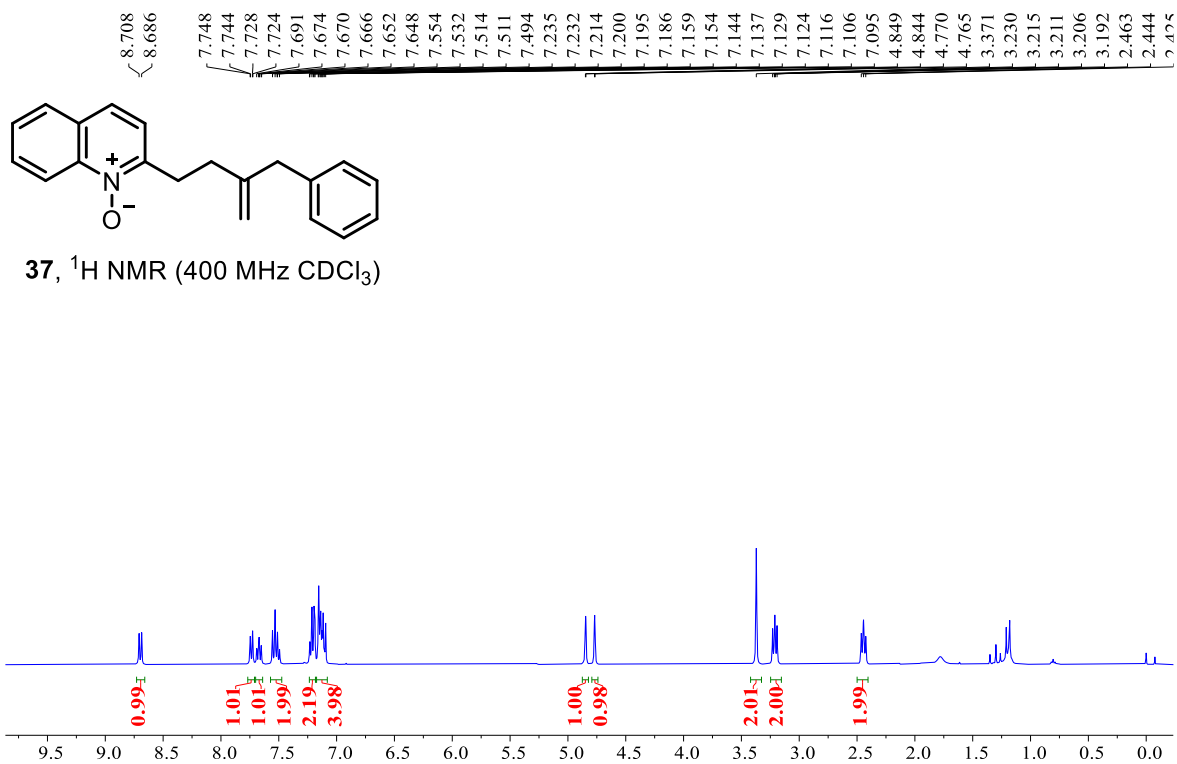

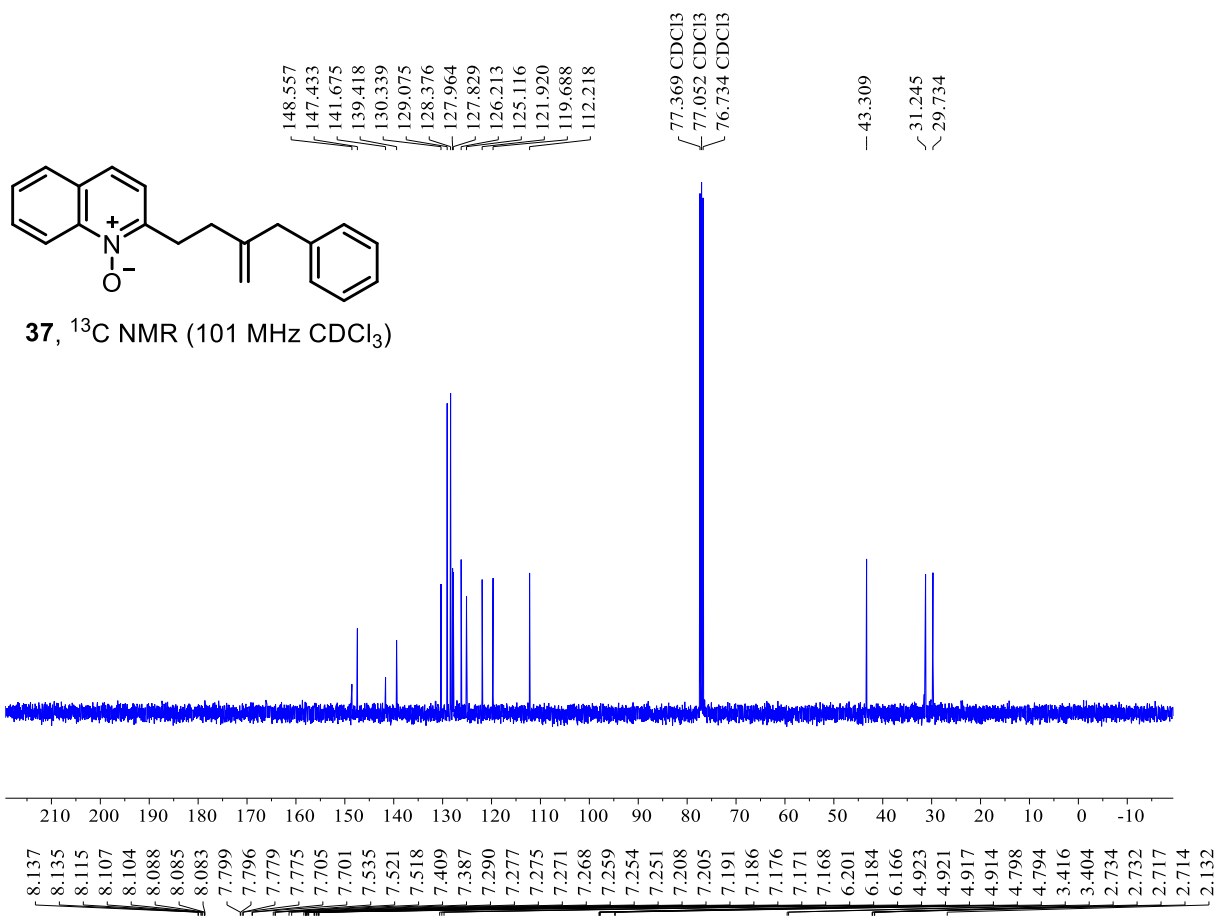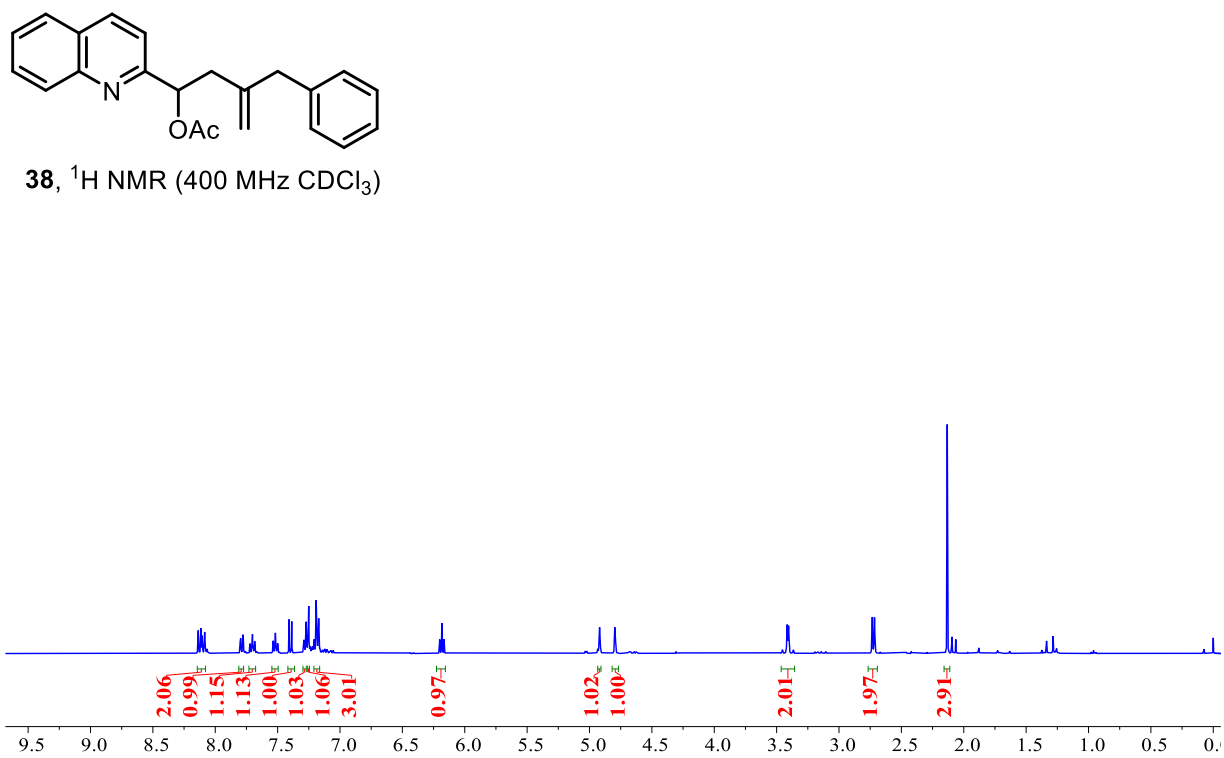

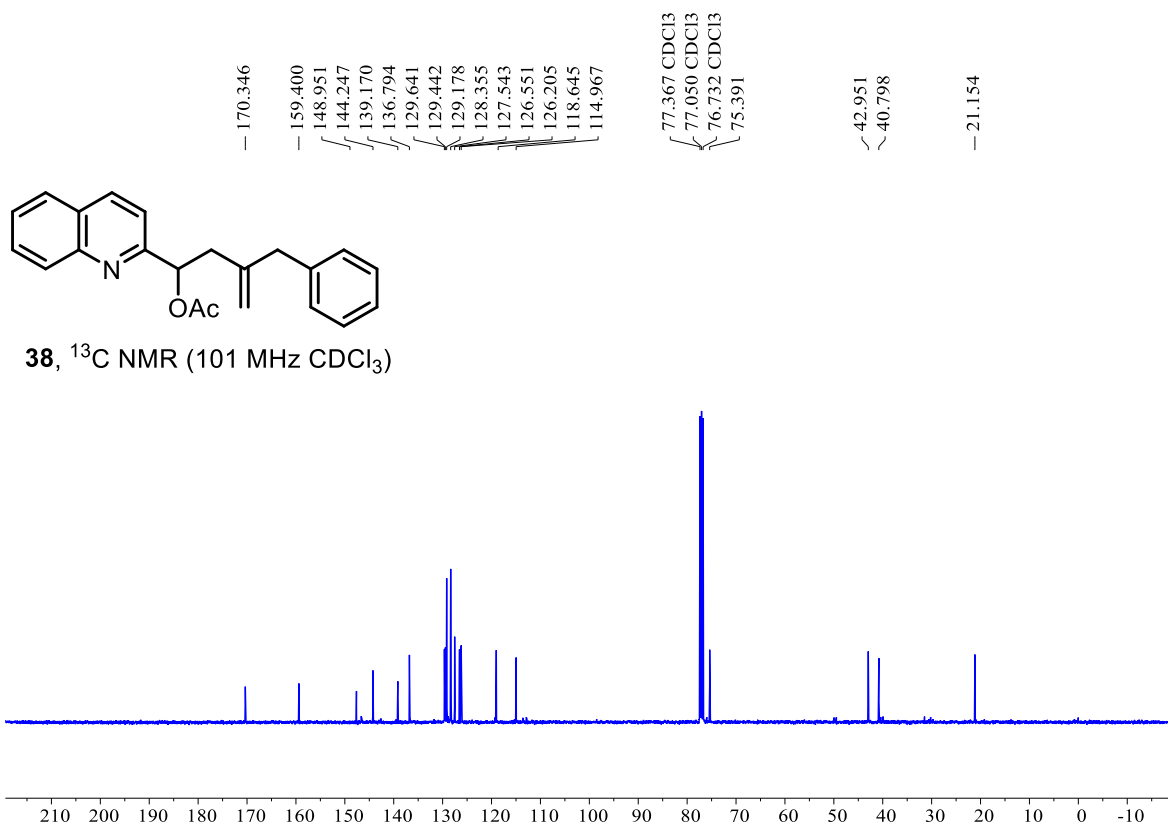

Supplement: d6cc02809h1.pdf [file d6cc02809h1.pdf]
